# Supplementary material for: D4Z4 Methylation Levels Combined with a Machine Learning Pipeline Highlight Single CpG Sites as Discriminating Biomarkers for FSHD Patients
Source: MDPI journal article supplement (doi:10.3390/cells11244114), 2022-12-18
Supplement: s1 [file s1]

## Supplementary Methods

The accuracy score was defined as follows:

$$Accuracy = \frac{\# \text{ of correct predictions}}{\# \text{ of total predictions}}$$

The F1-Score was defined as the harmonic mean of Precision and Recall:

$$Precision = \frac{\# \text{ of True Positives}}{\# \text{ of True Positives} + \# \text{ of False Positives}}$$

$$Recall = \frac{\# \text{ of True Positives}}{\# \text{ of True Positives} + \# \text{ of False Negatives}}$$

$$F1 = 2 \times \frac{Precision \times Recall}{Precision + Recall}$$
