# Supplementary material for: D4Z4 Methylation Levels Combined with a Machine Learning Pipeline Highlight Single CpG Sites as Discriminating Biomarkers for FSHD Patients
Source: Cells. 2022 Dec 18;11(24):4114. doi: 10.3390/cells11244114 (PMC9777431; doi:10.3390/cells11244114)
Supplement: Supplementary file 1 [file cells-11-04114-s001.zip › cells-1969223-supplementary-Tables S1-S7.xlsx]

## Sheet: Suppl.TableS1A
Subject	Year of birth	Gender	D4Z4 size	Subtelomeric 4q type	Pathogenic/likely-pathogenic variant
FSHD 1	1979	M	8	4qA/4qA	SMCHD1: c.5150_5151delAA (p.K1717Rfs*16), (P,C5)
FSHD 2	1957	F	27.1015	4qA/4qA	SMCHD1: c.5150_5151delAA (p.K1717Rfs*16), (P,C5)
FSHD 3	1955	M	26.4955	4qA/4qA	SMCHD1: c.5150_5151delAA (p.K1717Rfs*16), (P,C5)
FSHD 4	1980	M	4	4qA/4qB	/
FSHD 5	1963	F	5	4qA/4qA	/
FSHD 6	1986	M	5	4qA/4qB	/
FSHD 7		M	10	4qA/4qA	SMCHD1: c.2129dupC (p.A711C fs*11), (P,C5)
FSHD 8	1968	M	5	4qA/4qA	/
FSHD 9		M	4	4qA/4qB	/
FSHD 10	1982	M	4	4qA/4qB	/
FSHD 11	1975	M	10	4qA/4qA	SMCHD1: c.853G>C (p.G285R), (LP, C4)
FSHD 12	1965	M	6	4qA/4qB	/
FSHD 13	1957	M	6	4qA/4qA	/
FSHD 14	1963	F	5	4qA/4qB	/
FSHD 15	1958	M	4	4qA/4qB	/
FSHD 16	1999	F	5	4qA/4qB	/
FSHD 17	1961	F	7	4qA/4qA	/
FSHD 18	1980	M	4	4qA/4qB	/
FSHD 19	1940	M	8	4qA/4qB	/
FSHD 20	1950	F	6	4qA/4qB	/
FSHD 21	1968	F	6	4qA/4qB	/
FSHD 22	1964	F	3	4qA/4qB	/
FSHD 23	1985	M	4	4qA/4qA	/
FSHD 24	1948	F	4	4qA/4qA	LRIF1: c.748delT (p.Y250TfsTer8), (LP, C4)
FSHD 25	1983	M	4	4qA/4qA	SMCHD1: c. 5627T>C (p.L1876P), (VUS,C3); LRIF1: c.748delT (p.Y250TfsTer8), (LP, C4)
FSHD 26	1979	M	29.2227	4qA/4qA	/
FSHD 27	1952	F	4	4qA/4qB	/
FSHD 28		F	5	4qA/4qB	/
FSHD 29	1946	M	6	4qA/4qA	/
FSHD 30	1961	F	9	4qA/4qB	/
FSHD 31	1974	F	6	4qA/4qB	/
FSHD 32	1956	F	6+7	4qA/4qA	/
FSHD 33	1990	F	4	4qA/4qB	/
FSHD 34	1968	M	6	4qA/4qA	/
FSHD 35	1972	M	3	4qA/4qB	/
FSHD 36	1963	F	5	4qA/4qB	/
FSHD 37	2000	M	6	4qA/4qA	/
FSHD 38	1959	M	5+8	4qA/4qA	/
FSHD 39	1983	M	5	4qA/4qB	/
FSHD 40	1984	F	8	4qA/4qB	/
FSHD 41	1939	F	6	4qA/4qB	/
FSHD 42	1942	M	5	4qA/4qA	/
FSHD 43	1963	M	5	4qA/4qB	/
FSHD 44	1954	M	6	4qA/4qA	/
FSHD 45	1975	F	4	4qA/4qB	/
FSHD 46	1963	F	5	4qA/4qB	/
FSHD 47	1960	F	6	4qA/4qA	/
FSHD 48		M	>10	4qA/4qB	/
FSHD 49		F	6	4qA/4qA	/
FSHD 50	1944	M	4	4qA/4qB	/
FSHD 51	1978	F	4	4qA/4qB	/
FSHD 52		F	5	4qA/4qA	/
FSHD 53	1975	M	5	4qA/4qA	/
FSHD 54	1961	M	5	4qA/4qA	/
FSHD 55		M	6	4qA/4qA	/
FSHD 56	1961	F	6	4qA/4qB	/
FSHD 57	2004	M	3	4qA/4qB	/
FSHD 58	1978	M	6	4qA/4qA	/
FSHD 59	1961	M	4	4qA/4qA	/
FSHD 60	2002	M	6	4qA/4qA	/
FSHD 61	1952	F	4	4qA/4qB	/
FSHD 62	1980	F	4	4qA/4qA	/
FSHD 63	2000	M	4	4qA/4qB	/
FSHD 64	1996	F	6	4qA/4qB	/
FSHD 65	1994	F	3	4qA/4qA	/
FSHD 66	1990	M	3	4qA/4qA	/
FSHD 67	1953	M	7	4qA/4qA	/
FSHD 68	1936	M	3	4qA/4qB	/
FSHD 69	1946	M	6	4qA/4qB	/
FSHD 70	1951	M	6	4qA/4qA	/
FSHD 71	1962	M	5	4qA/4qB	/
FSHD 72	1963	M	4	4qA/4qB	/
FSHD 73	1966	M	7	4qA/4qB	/
FSHD 74	1965	F	3	4qA/4qA	/
FSHD 75	1946	M	6	4qA/4qB	/
FSHD 76	2003	M	5	4qA/4qA	SMCHD1: c.3514G>T (p.V1172F), (LP, C4)
FSHD 77	1974	F	10	4qA/4qB	SMCHD1: c.3514G>T (p.V1172F), (LP, C4)
FSHD 78	1953	M	4	4qA/4qA	/
FSHD 79	1956	M	4	4qA/4qA	/
FSHD 80	1956	M	7	4qA/4qB	/
FSHD 81	1966	F	6	4qA/4qB	/
FSHD 82		F	6	4qA/4qA	/
FSHD 83	1950	M	42.8591	4qA/4qA	/
FSHD 84	1951	M	5	4qA/4qA	/
FSHD 85	1984	M	5	4qA/4qA	/
FSHD 86	1952	F	5	4qA/4qB	/
FSHD 87	1977	F	>10	4qA/4qB	/
FSHD 88	2000	M	11	4qA/4qB	/
FSHD 89	1996	F	6	4qA/4qB	/
FSHD 90	1953	F	>10	4qA/4qB	/
FSHD 91		M	6	4qA/4qA	/
FSHD 92	1986	F	6	4qA/4qB	/
FSHD 93	1987	M	6	4qA/4qA	SMCHD1: c.1561 G>T (p.V521F), (LP,C4)
FSHD 94	1951	M	6	4qA/4qB	/
FSHD 95	1943	F	12.5561	4qA/4qB	/
FSHD 96	1964	M	8	4qA/4qB	/
FSHD 97		F	7	4qA/4qA	SMCHD1: c.3469G>T (p.G1157*), (P,C5)
FSHD 98		M	7	4qA/4qA	/
FSHD 99	1983	F	3	4qA/4qA	/
FSHD 100	1988	M	3	4qA/4qA	/
FSHD 101		M	5	4qA/4qA	/
FSHD 102	1992	M	5	4qA/4qB	/
FSHD 103	1951	F	5	4qA/4qA	/
FSHD 104	1977	M	5	4qA/4qA	/
FSHD 105	1962	M	4	4qA/4qA	/
FSHD 106	1998	F	4	4qA/4qA	/
FSHD 107	1969	M	4	4qA/4qA	/
FSHD 108	1948	F	4	4qA/4qB	/
FSHD 109	1983	M	>10	4qA/4qA	/
FSHD 110		F	4	4qA/4qA	/
FSHD 111	1987	M	4	4qA/4qB	/
FSHD 112	1985	F	4	4qA/4qB	/
FSHD 113	1973	F	3	4qA/4qB	/
FSHD 114		M	3	4qA/4qB	/
FSHD 115	1978	M	3	4qA/4qA	/
FSHD 116	1961	M	1	4qA/4qA	/
FSHD 117	2003	F	3	4qA/4qB	/
FSHD 118	1963	M	5	4qA/4qB	/
FSHD 119	1964	F	5	4qA/4qA	/
FSHD 120	1999	F	5	4qA/4qA	/
FSHD 121	1951	F	4	4qA/4qB	/
FSHD 122	1937	M	12.5561	4qA/4qA	SMCHD1: c.3010A>T (p.K1004*), (P,C5)
FSHD 123	1987	M	10	4qA/4qA	SMCHD1: c.182_183dupGT (p.Q62Vfs*48), (P, C5)
FSHD 124	1990	F	3	4qA/4qB	/
FSHD 125	1984	F	6	4qA/4qB	/
FSHD 126		F	4	4qA/4qA	/
FSHD 127		F	4	4qA/4qA	/
FSHD 128	1957	F	4	4qA/4qA	/
FSHD 129		F	>10	4qA/4qA	SMCHD1: c.1131+2_1131+5delTAAG, (P, C5)
FSHD 130	1970	F	5	4qA/4qB	/
FSHD 131	1999	M	3	4qA/4qA	/
FSHD 132	1947	F	8	4qA/4qA	/
FSHD 133	1976	F	8	4qA/4qA	SMCHD1: c.1529 C>T (p.S510F), (P,C5)

## Sheet: Suppl.TableS1B
Subject	Year of birth	Gender	Subtelomeric 4q type
CTRL 1	1944	M	4qA/4qA
CTRL 2	1954	M	4qA/4qA
CTRL 3	1939	M	4qA/4qA
CTRL 4	1980	M	4qA/4qA
CTRL 5	1943	M	4qA/4qA
CTRL 6	1946	F	4qA/4qA
CTRL 7	1974	M	4qA/4qB
CTRL 8	1978	F	4qA/4qA
CTRL 9	1959	M	4qA/4qB
CTRL 10	1989	F	4qA/4qA
CTRL 11	1974	F	4qA/4qB
CTRL 12		F	4qA/4qB
CTRL 13	1955	M	4qA/4qB
CTRL 14	1982	M	4qA/4qB
CTRL 15		M	4qA/4qB
CTRL 16	1950	M	4qA/4qA
CTRL 17	1955	F	4qA/4qA
CTRL 18	1959	F	4qA/4qB
CTRL 19	1952	M	4qA/4qB
CTRL 20	1961	F	4qA/4qB
CTRL 21		M	4qA/4qA
CTRL 22	1961	F	4qA/4qA
CTRL 23	1934	M	4qA/4qB
CTRL 24	1974	M	4qA/4qB
CTRL 25	1984	M	4qA/4qB
CTRL 26	1992	M	4qA/4qB
CTRL 27	1983	M	4qA/4qB
CTRL 28	1943	F	4qA/4qB
CTRL 29	1947	F	4qA/4qB
CTRL 30		M	4qA/4qB
CTRL 31	1981	M	4qA/4qB
CTRL 32	1997	M	4qA/4qA
CTRL 33		M	4qA/4qB
CTRL 34	1937	M	4qA/4qB
CTRL 35	1966	F	4qA/4qB
CTRL 36	1978	M	4qA/4qA
CTRL 37	1993	M	4qA/4qB
CTRL 38	1957	M	4qA/4qB
CTRL 39		M	4qA/4qB
CTRL 40	1965	M	4qA/4qB
CTRL 41	1985	M	4qA/4qB
CTRL 42	1952	F	4qA/4qB
CTRL 43		F	4qA/4qB
CTRL 44	1964	M	4qA/4qB
CTRL 45	1987	F	4qA/4qB
CTRL 46		F	4qA/4qA
CTRL 47	1952	M	4qA/4qA
CTRL 48	1981	F	4qA/4qB
CTRL 49	1949	M	4qA/4qB
CTRL 50		M	4qA/4qB
CTRL 51	1964	M	4qA/4qA
CTRL 52	1977	M	4qA/4qA
CTRL 53	1969	M	4qA/4qB
CTRL 54	1970	F	4qA/4qB
CTRL 55	1964	F	4qA/4qB
CTRL 56	1981	M	4qA/4qB
CTRL 57		M	4qA/4qB
CTRL 58	1958	M	4qA/4qB
CTRL 59	1963	M	4qA/4qB
CTRL 60		M	4qA/4qB
CTRL 61	1971	M	4qA/4qB
CTRL 62		M	4qA/4qA
CTRL 63	1991	F	4qA/4qA
CTRL 64	1966	F	4qA/4qA
CTRL 65	1975	M	4qA/4qA
CTRL 66		F	4qA/4qA
CTRL 67	1964	M	4qA/4qB
CTRL 68	1959	F	4qA/4qA
CTRL 69	1993	M	4qA/4qB
CTRL 70	1962	F	4qA/4qA
CTRL 71		M	4qA/4qB
CTRL 72	2001	M	4qA/4qB
CTRL 73	1969	M	4qA/4qB
CTRL 74	1984	M	4qA/4qB
CTRL 75		M	4qA/4qB
CTRL 76	1969	M	4qA/4qA
CTRL 77		M	4qA/4qA
CTRL 78	1981	F	4qA/4qB
CTRL 79	1953	F	4qA/4qB
CTRL 80	1943	M	4qA/4qB
CTRL 81	1981	M	4qA/4qA
CTRL 82	1940	M	4qA/4qA
CTRL 83	1962	F	4qA/4qB
CTRL 84	1980	M	4qA/4qB
CTRL 85	1953	F	4qA/4qB
CTRL 86	1981	M	4qA/4qB
CTRL 87	1986	M	4qA/4qB
CTRL 88	1997	F	4qA/4qA
CTRL 89	1942	M	4qA/4qA
CTRL 90		F	4qA/4qB
CTRL 91	1967	M	4qA/4qB
CTRL 92	1952	F	4qA/4qB
CTRL 93	1967	M	4qA/4qB
CTRL 94		M	4qA/4qB
CTRL 95	1955	M	4qA/4qB
CTRL 96	1945	F	4qA/4qB
CTRL 97	1948	F	4qA/4qB
CTRL 98	1952	F	4qA/4qB
CTRL 99	1968	F	4qA/4qA
CTRL 100		M	4qA/4qA
CTRL 101	1976	M	4qA/4qA
CTRL 102	1966	M	4qA/4qA
CTRL 103	1949	M	4qA/4qA
CTRL 104	1980	M	4qA/4qB
CTRL 105		F	4qA/4qA
CTRL 106	1941	F	4qA/4qB
CTRL 107		M	4qA/4qA
CTRL 108	1951	M	4qA/4qB
CTRL 109	1952	M	4qA/4qB
CTRL 110	1954	M	4qA/4qB
CTRL 111	1965	M	4qA/4qA
CTRL 112		F	4qA/4qB
CTRL 113	1957	M	4qA/4qB
CTRL 114	1954	F	4qA/4qB
CTRL 115	2001	M	4qA/4qB
CTRL 116	1997	M	4qA/4qB
CTRL 117	1944	M	4qA/4qB
CTRL 118	1951	F	4qA/4qB
CTRL 119		F	4qA/4qB
CTRL 120	1947	M	4qA/4qB
CTRL 121	1954	F	4qA/4qA
CTRL 122	1978	M	4qA/4qA
CTRL 123		M	4qA/4qA
CTRL 124	1952	M	4qA/4qA
CTRL 125	1948	M	4qA/4qA
CTRL 126	1977	M	4qA/4qB
CTRL 127	1985	F	4qA/4qA
CTRL 128		M	4qA/4qB
CTRL 129	1956	F	4qA/4qA
CTRL 130	1979	F	4qA/4qB
CTRL 131	1961	M	4qA/4qB
CTRL 132	1969	M	4qA/4qB
CTRL 133	1964	M	4qA/4qA
CTRL 134		F	4qA/4qB
CTRL 135	1958	M	4qA/4qB
CTRL 136	1964	F	4qA/4qB
CTRL 137		M	4qA/4qB
CTRL 138	1976	F	4qA/4qB
CTRL 139	1953	F	4qA/4qA
CTRL 140	1968	M	4qA/4qA
CTRL 141	1979	M	4qA/4qB
CTRL 142	1963	F	4qA/4qB
CTRL 143		M	4qA/4qB
CTRL 144	1952	F	4qA/4qA
CTRL 145	1990	F	4qA/4qB
CTRL 146	1947	M	4qA/4qA
CTRL 147		M	4qA/4qB
CTRL 148	1964	M	4qA/4qB
CTRL 149	1962	F	4qA/4qB
CTRL 150	1958	F	4qA/4qB

## Sheet: Suppl.TableS1C
Subject	Year of birth	Gender	D4Z4 size	Subtelomeric 4q type	Pathogenic/likely-pathogenic variant
ID 1	1941	F	4	4qA/4qA	/
ID 2	1942	F	3	4qA/4qB	/
ID 3	1944	M	4	4qA/4qB	/
ID 4	1951	F	>10	4qA/4qB	/
ID 5	1951	F	>10	4qA/4qB	/
ID 6	1952	M	8	4qA/4qB	/
ID 7	1952	M	4	4qA/4qB	/
ID 8	1953	F	6	4qA/4qB	/
ID 9	1953	M	3	4qA/4qA	/
ID 10	1955	F	10	4qA/4qA	/
ID 11	1955	M	>10	4qA/4qA	/
ID 12	1955	F	>10	4qA/4qB	/
ID 13	1955	F	6	4qA/4qB	/
ID 14	1956	F	10	4qA/4qB	/
ID 15	1956	M	4	4qA/4qA	/
ID 16	1957	F	3	4qA/4qA	/
ID 17	1958	M	6	4qA/4qB	/
ID 18	1947	F	>10	4qA/4qA	SMCHD1: c.3799dup (p.E1267GfsTer7), (P,C5)
ID 19	1960	F	>10	4qA/4qB	/
ID 20	1960	F	5	4qA/4qB	/
ID 21	1962	F	5	4qA/4qA	/
ID 22	1963	M	>10	4qA/4qA	/
ID 23	1964	M	13	4qA/4qB	SMCHD1: c.3010A>T (p.K1004*), (P,C5)
ID 24	1966	M	3	4qA/4qB	/
ID 25	1967	M	5	4qA/4qB	/
ID 26	1968	F	>10	4qA/4qA	/
ID 27	1968	F	6	4qA/4qA	/
ID 28	1969	M	5	4qA/4qB	/
ID 29	1971	M	>10	4qA/4qB	/
ID 30	1972	F	>10	4qA/4qB	/
ID 31	1967	M	5	4qA/4qB	/
ID 32	1975	M	4	4qA/4qA	/
ID 33	1976	M	>10	4qA/4qB	/
ID 34	1976	F	>10	4qA/4qB	/
ID 35	1977	M	>10	4qA/4qB	/
ID 36	1979	M	>10	4qA/4qB	/
ID 37	1983	M	>10	4qA/4qB	/
ID 38	1986	M	4	4qA/4qA	/
ID 39	1988	M	1	4qA/4qA	/
ID 40	1990	M	>10	4qA/4qB	/
ID 41	1990	F	3	4qA/4qB	/
ID 42	1991	F	>10	4qA/4qA	/
ID 43	1991	F	>10	4qA/4qB	/
ID 44	1993	M	>10	4qA/4qB	/
ID 45	1993	M	8	4qA/4qB	/
ID 46	1993	M	4	4qA/4qB	/
ID 47	2004	M	3	4qA/4qA	/
ID 48		F	>10	4qA/4qA	/
ID 49		F	6	4qA/4qB	/
ID 50		F	4	4qA/4qB	/
ID 51		F	5	4qA/4qA	/
ID 52		M	4	4qA/4qA	/

## Sheet: Suppl.TableS2
y	df	sumsq	meansq	statistic	p.value	sig.p	fdr	sig.fdr
DUX4PAS_cpg.6	1	3.51038	3.51038	194.203	6.47192e-34	yes	2.58877e-32	yes
DUX4PAS_cpg.5	1	2.20609	2.20609	128.698	8.26805e-25	yes	1.65361e-23	yes
DUX4PAS_cpg.10	1	2.30053	2.30053	120.526	1.43385e-23	yes	1.9118e-22	yes
DUX4PAS_cpg.3	1	1.4795	1.4795	110.122	5.91402e-22	yes	5.91402e-21	yes
DUX4PAS_cpg.7	1	1.71031	1.71031	104.686	4.30285e-21	yes	3.44228e-20	yes
DUX4PAS_cpg.1	1	1.27074	1.27074	89.7778	1.15678e-18	yes	7.19536e-18	yes
DUX4PAS_cpg.4	1	2.018	2.018	89.5564	1.25919e-18	yes	7.19536e-18	yes
DUX4PAS_cpg.2	1	1.59465	1.59465	83.6037	1.25707e-17	yes	6.28536e-17	yes
DUX4PAS_cpg.9	1	1.41216	1.41216	78.8283	8.19288e-17	yes	3.64128e-16	yes
DR1_cpg.1	1	0.800384	0.800384	57.3356	5.31291e-13	yes	2.12517e-12	yes
DR1_cpg.29	1	0.626765	0.626765	47.2589	4.01975e-11	yes	1.46173e-10	yes
DR1_cpg.6	1	1.03555	1.03555	39.4964	1.24912e-09	yes	4.16372e-09	yes
DR1_cpg.9	1	0.56393	0.56393	39.0912	1.49855e-09	yes	4.61093e-09	yes
DR1_cpg.8	1	0.546571	0.546571	38.4937	1.9609e-09	yes	5.60258e-09	yes
DR1_cpg.2	1	0.157026	0.157026	38.3256	2.11526e-09	yes	5.64068e-09	yes
DR1_cpg.15	1	0.759059	0.759059	36.7121	4.38801e-09	yes	1.097e-08	yes
DR1_cpg.14	1	0.554681	0.554681	36.2503	5.41155e-09	yes	1.14302e-08	yes
DR1_cpg.26	1	0.768352	0.768352	36.2464	5.42103e-09	yes	1.14302e-08	yes
DR1_cpg.7	1	0.709077	0.709077	36.243	5.42936e-09	yes	1.14302e-08	yes
DR1_cpg.13	1	0.680736	0.680736	35.2353	8.59064e-09	yes	1.71813e-08	yes
DR1_cpg.10	1	0.427302	0.427302	34.157	1.4064e-08	yes	2.67886e-08	yes
DR1_cpg.16	1	0.579392	0.579392	33.6125	1.80527e-08	yes	3.28231e-08	yes
DR1_cpg.18	1	0.654739	0.654739	32.6311	2.83531e-08	yes	4.93098e-08	yes
DR1_cpg.12	1	0.539879	0.539879	31.5809	4.60533e-08	yes	7.67555e-08	yes
DR1_cpg.27	1	0.455767	0.455767	29.6423	1.13371e-07	yes	1.81394e-07	yes
DR1_cpg.17	1	0.355039	0.355039	26.4252	5.13903e-07	yes	7.9062e-07	yes
DR1_cpg.20	1	0.464233	0.464233	23.2574	2.3254e-06	yes	3.44503e-06	yes
DR1_cpg.19	1	0.497383	0.497383	22.5768	3.22582e-06	yes	4.60831e-06	yes
DR1_cpg.23	1	0.352525	0.352525	22.0361	4.18699e-06	yes	5.77516e-06	yes
DR1_cpg.5	1	0.227789	0.227789	21.7391	4.83342e-06	yes	6.23943e-06	yes
DR1_cpg.11	1	0.329843	0.329843	21.6772	4.98039e-06	yes	6.23943e-06	yes
DUX4PAS_cpg.8	1	0.675621	0.675621	21.6725	4.99155e-06	yes	6.23943e-06	yes
DR1_cpg.28	1	0.280193	0.280193	21.1707	6.3654e-06	yes	7.71564e-06	yes
DR1_cpg.21	1	0.251072	0.251072	20.8614	7.39673e-06	yes	8.70204e-06	yes
DR1_cpg.3	1	0.0677102	0.0677102	20.5043	8.79962e-06	yes	1.00567e-05	yes
DR1_cpg.24	1	0.375985	0.375985	20.0651	1.09001e-05	yes	1.21112e-05	yes
DR1_cpg.4	1	0.19583	0.19583	18.007	2.99236e-05	yes	3.23498e-05	yes
DR1_cpg.25	1	0.277117	0.277117	12.9807	0.000372099	yes	0.000391683	yes
DR1_cpg.22	1	0.100461	0.100461	10.3302	0.00146121	yes	0.00149868	yes
Year of birth	1	1314.87	1314.87	5.50021	0.0197099	yes	0.0197099	yes

## Sheet: Suppl.TableS3
y	df	sumsq	meansq	statistic	p.value	sig.p	fdr	sig.fdr
DUX4PAS_cpg.9	1	0.372838	0.372838	24.5291	3.80734e-05	yes	0.0012843	yes
DUX4PAS_cpg.6	1	0.662419	0.662419	21.3026	9.27558e-05	yes	0.0012843	yes
DUX4PAS_cpg.1	1	0.238266	0.238266	21.1708	9.63225e-05	yes	0.0012843	yes
DUX4PAS_cpg.3	1	0.285001	0.285001	19.5867	0.000153029	yes	0.00153029	yes
DUX4PAS_cpg.5	1	0.366302	0.366302	14.6649	0.000728199	yes	0.00582559	yes
DUX4PAS_cpg.2	1	0.332265	0.332265	13.7293	0.00100337	yes	0.00646043	yes
DUX4PAS_cpg.7	1	0.269432	0.269432	13.3872	0.00113057	yes	0.00646043	yes
DUX4PAS_cpg.10	1	0.357776	0.357776	12.825	0.00137928	yes	0.00689639	yes
DUX4PAS_cpg.4	1	0.339635	0.339635	9.4431	0.0049265	yes	0.0218956	yes
DUX4PAS_cpg.8	1	0.175824	0.175824	6.47955	0.0171862	yes	0.0687448	no
DR1_cpg.22	1	0.0304803	0.0304803	1.62892	0.213136	no	0.775042	no
Year of birth	1	155.571	155.571	0.541677	0.468327	no	0.985233	no
DR1_cpg.2	1	0.00233595	0.00233595	0.337071	0.566523	no	0.985233	no
DR1_cpg.25	1	0.0132269	0.0132269	0.298479	0.589496	no	0.985233	no
DR1_cpg.3	1	0.00167654	0.00167654	0.277306	0.602936	no	0.985233	no
DR1_cpg.19	1	0.00697177	0.00697177	0.143214	0.708179	no	0.985233	no
DR1_cpg.23	1	0.00377682	0.00377682	0.105419	0.748019	no	0.985233	no
DR1_cpg.20	1	0.00448862	0.00448862	0.0968674	0.758104	no	0.985233	no
DR1_cpg.27	1	0.0033732	0.0033732	0.096623	0.758399	no	0.985233	no
DR1_cpg.16	1	0.00351928	0.00351928	0.0893023	0.767442	no	0.985233	no
DR1_cpg.18	1	0.00371035	0.00371035	0.0855218	0.77227	no	0.985233	no
DR1_cpg.11	1	0.00236749	0.00236749	0.0775609	0.782833	no	0.985233	no
DR1_cpg.15	1	0.00336903	0.00336903	0.0676671	0.796813	no	0.985233	no
DR1_cpg.24	1	0.00281794	0.00281794	0.0670329	0.797746	no	0.985233	no
DR1_cpg.17	1	0.00182957	0.00182957	0.0647325	0.801168	no	0.985233	no
DR1_cpg.1	1	0.00197365	0.00197365	0.0642493	0.801895	no	0.985233	no
DR1_cpg.10	1	0.00172052	0.00172052	0.0634605	0.803088	no	0.985233	no
DR1_cpg.8	1	0.0017644	0.0017644	0.0603926	0.807806	no	0.985233	no
DR1_cpg.13	1	0.00258346	0.00258346	0.0580765	0.811453	no	0.985233	no
DR1_cpg.12	1	0.00195199	0.00195199	0.0498477	0.825073	no	0.985233	no
DR1_cpg.14	1	0.00155317	0.00155317	0.0467891	0.830436	no	0.985233	no
DR1_cpg.26	1	0.00105768	0.00105768	0.0215479	0.884428	no	0.985233	no
DR1_cpg.6	1	0.000955386	0.000955386	0.0201299	0.888269	no	0.985233	no
DR1_cpg.21	1	0.000313918	0.000313918	0.0132348	0.909295	no	0.985233	no
DR1_cpg.29	1	0.000248369	0.000248369	0.00879529	0.926	no	0.985233	no
DR1_cpg.9	1	0.000244027	0.000244027	0.00691899	0.934345	no	0.985233	no
DR1_cpg.4	1	9.54846e-05	9.54846e-05	0.00495564	0.944417	no	0.985233	no
DR1_cpg.7	1	0.000127003	0.000127003	0.00302744	0.956541	no	0.985233	no
DR1_cpg.28	1	6.51761e-05	6.51761e-05	0.00248767	0.960602	no	0.985233	no
DR1_cpg.5	1	6.5333e-06	6.5333e-06	0.000340678	0.985415	no	0.985415	no

## Sheet: Suppl.TableS4
y	df	sumsq	meansq	statistic	p.value	sig.p	fdr	sig.fdr
DR1_cpg.9	1	0.816186	0.816186	43.5163	3.73263e-07	yes	5.29157e-06	yes
DR1_cpg.7	1	0.889187	0.889187	43.3923	3.82632e-07	yes	5.29157e-06	yes
DR1_cpg.20	1	0.989664	0.989664	42.4306	4.64485e-07	yes	5.29157e-06	yes
DR1_cpg.13	1	0.877523	0.877523	40.6115	6.75337e-07	yes	5.29157e-06	yes
DR1_cpg.19	1	0.98019	0.98019	40.1053	7.50835e-07	yes	5.29157e-06	yes
DR1_cpg.3	1	0.16241	0.16241	39.185	9.12291e-07	yes	5.29157e-06	yes
DR1_cpg.15	1	0.96011	0.96011	38.3519	1.09081e-06	yes	5.29157e-06	yes
DR1_cpg.16	1	0.748453	0.748453	37.8082	1.22731e-06	yes	5.29157e-06	yes
DR1_cpg.25	1	0.991215	0.991215	37.8026	1.22882e-06	yes	5.29157e-06	yes
DR1_cpg.18	1	0.863782	0.863782	37.4648	1.32289e-06	yes	5.29157e-06	yes
DR1_cpg.12	1	0.685602	0.685602	35.7738	1.92545e-06	yes	7.00164e-06	yes
DR1_cpg.2	1	0.142499	0.142499	34.8444	2.37711e-06	yes	7.92369e-06	yes
DR1_cpg.23	1	0.711584	0.711584	34.3563	2.65872e-06	yes	8.18068e-06	yes
DR1_cpg.8	1	0.537622	0.537622	33.8713	2.97435e-06	yes	8.49813e-06	yes
DR1_cpg.24	1	0.764904	0.764904	33.2545	3.43502e-06	yes	8.97428e-06	yes
DR1_cpg.6	1	0.833863	0.833863	32.8486	3.77956e-06	yes	8.97428e-06	yes
DR1_cpg.14	1	0.554241	0.554241	32.767	3.85319e-06	yes	8.97428e-06	yes
DR1_cpg.17	1	0.458365	0.458365	32.428	4.17608e-06	yes	8.97428e-06	yes
DR1_cpg.11	1	0.532083	0.532083	32.3381	4.2664e-06	yes	8.97428e-06	yes
DR1_cpg.10	1	0.452024	0.452024	32.1269	4.48714e-06	yes	8.97428e-06	yes
DR1_cpg.29	1	0.494645	0.494645	30.0957	7.36022e-06	yes	1.36618e-05	yes
DR1_cpg.28	1	0.458331	0.458331	30.0124	7.51401e-06	yes	1.36618e-05	yes
DR1_cpg.26	1	0.823703	0.823703	29.8278	7.86717e-06	yes	1.3682e-05	yes
DR1_cpg.5	1	0.257995	0.257995	29.5445	8.44458e-06	yes	1.40743e-05	yes
DR1_cpg.21	1	0.413876	0.413876	28.6284	1.06444e-05	yes	1.70311e-05	yes
DR1_cpg.4	1	0.259128	0.259128	27.0975	1.58139e-05	yes	2.43291e-05	yes
DR1_cpg.27	1	0.61781	0.61781	26.3727	1.91518e-05	yes	2.83731e-05	yes
DR1_cpg.1	1	0.407619	0.407619	21.7177	7.01946e-05	yes	0.000100278	yes
DR1_cpg.22	1	0.443258	0.443258	17.9022	0.000225481	yes	0.000311008	yes
DUX4PAS_cpg.4	1	0.110032	0.110032	8.73347	0.00627318	yes	0.00836424	yes
DUX4PAS_cpg.2	1	0.0549997	0.0549997	2.6058	0.117688	no	0.151856	no
DUX4PAS_cpg.6	1	0.0308022	0.0308022	1.24768	0.273489	no	0.340899	no
DUX4PAS_cpg.10	1	0.0239581	0.0239581	1.20722	0.281241	no	0.340899	no
DUX4PAS_cpg.7	1	0.0140454	0.0140454	1.07465	0.308768	no	0.363257	no
DUX4PAS_cpg.5	1	0.0130581	0.0130581	1.01358	0.322667	no	0.368763	no
DUX4PAS_cpg.9	1	0.0073501	0.0073501	0.384589	0.540172	no	0.600192	no
DUX4PAS_cpg.3	1	0.00236365	0.00236365	0.184886	0.670499	no	0.708594	no
Year of birth	1	58.8	58.8	0.181714	0.673164	no	0.708594	no
DUX4PAS_cpg.1	1	0.00200665	0.00200665	0.124573	0.72677	no	0.745405	no
DUX4PAS_cpg.8	1	2.32275e-09	2.32275e-09	1.37752e-07	0.999706	no	0.999706	no

## Sheet: Suppl.TableS5
term	class	estimate	conf.low	conf.high	p.value	prep	model
accuracy		0.942308	0.840527	0.987941	2.95987e-11	NTH	ctree2
kappa		0.884615				NTH	ctree2
mcnemar					1	NTH	ctree2
sensitivity	FSHD	0.925926				NTH	ctree2
specificity	FSHD	0.96				NTH	ctree2
pos_pred_value	FSHD	0.961538				NTH	ctree2
neg_pred_value	FSHD	0.923077				NTH	ctree2
precision	FSHD	0.961538				NTH	ctree2
recall	FSHD	0.925926				NTH	ctree2
f1	FSHD	0.943396				NTH	ctree2
prevalence	FSHD	0.519231				NTH	ctree2
detection_rate	FSHD	0.480769				NTH	ctree2
detection_prevalence	FSHD	0.5				NTH	ctree2
balanced_accuracy	FSHD	0.942963				NTH	ctree2
accuracy		0.865385	0.742121	0.944121	1.46776e-07	NTH	glmnet
kappa		0.731563				NTH	glmnet
mcnemar					0.449692	NTH	glmnet
sensitivity	FSHD	0.814815				NTH	glmnet
specificity	FSHD	0.92				NTH	glmnet
pos_pred_value	FSHD	0.916667				NTH	glmnet
neg_pred_value	FSHD	0.821429				NTH	glmnet
precision	FSHD	0.916667				NTH	glmnet
recall	FSHD	0.814815				NTH	glmnet
f1	FSHD	0.862745				NTH	glmnet
prevalence	FSHD	0.519231				NTH	glmnet
detection_rate	FSHD	0.423077				NTH	glmnet
detection_prevalence	FSHD	0.461538				NTH	glmnet
balanced_accuracy	FSHD	0.867407				NTH	glmnet
accuracy		0.846154	0.719189	0.931161	7.89286e-07	NTH	svmLinear
kappa		0.694567				NTH	svmLinear
mcnemar					0.0770999	NTH	svmLinear
sensitivity	FSHD	0.740741				NTH	svmLinear
specificity	FSHD	0.96				NTH	svmLinear
pos_pred_value	FSHD	0.952381				NTH	svmLinear
neg_pred_value	FSHD	0.774194				NTH	svmLinear
precision	FSHD	0.952381				NTH	svmLinear
recall	FSHD	0.740741				NTH	svmLinear
f1	FSHD	0.833333				NTH	svmLinear
prevalence	FSHD	0.519231				NTH	svmLinear
detection_rate	FSHD	0.384615				NTH	svmLinear
detection_prevalence	FSHD	0.403846				NTH	svmLinear
balanced_accuracy	FSHD	0.85037				NTH	svmLinear
accuracy		0.846154	0.719189	0.931161	7.89286e-07	NTH	svmRadial
kappa		0.690936				NTH	svmRadial
mcnemar					0.723674	NTH	svmRadial
sensitivity	FSHD	0.888889				NTH	svmRadial
specificity	FSHD	0.8				NTH	svmRadial
pos_pred_value	FSHD	0.827586				NTH	svmRadial
neg_pred_value	FSHD	0.869565				NTH	svmRadial
precision	FSHD	0.827586				NTH	svmRadial
recall	FSHD	0.888889				NTH	svmRadial
f1	FSHD	0.857143				NTH	svmRadial
prevalence	FSHD	0.519231				NTH	svmRadial
detection_rate	FSHD	0.461538				NTH	svmRadial
detection_prevalence	FSHD	0.557692				NTH	svmRadial
balanced_accuracy	FSHD	0.844444				NTH	svmRadial
accuracy		0.480769	0.340119	0.623687	0.756228	NTH	svmLinearWeights2
kappa		0				NTH	svmLinearWeights2
mcnemar					5.62396e-07	NTH	svmLinearWeights2
sensitivity	FSHD	0				NTH	svmLinearWeights2
specificity	FSHD	1				NTH	svmLinearWeights2
pos_pred_value	FSHD	#NUM!				NTH	svmLinearWeights2
neg_pred_value	FSHD	0.480769				NTH	svmLinearWeights2
precision	FSHD					NTH	svmLinearWeights2
recall	FSHD	0				NTH	svmLinearWeights2
f1	FSHD					NTH	svmLinearWeights2
prevalence	FSHD	0.519231				NTH	svmLinearWeights2
detection_rate	FSHD	0				NTH	svmLinearWeights2
detection_prevalence	FSHD	0				NTH	svmLinearWeights2
balanced_accuracy	FSHD	0.5				NTH	svmLinearWeights2
accuracy		0.846154	0.719189	0.931161	7.89286e-07	NTH	nb
kappa		0.693667				NTH	nb
mcnemar					0.288844	NTH	nb
sensitivity	FSHD	0.777778				NTH	nb
specificity	FSHD	0.92				NTH	nb
pos_pred_value	FSHD	0.913043				NTH	nb
neg_pred_value	FSHD	0.793103				NTH	nb
precision	FSHD	0.913043				NTH	nb
recall	FSHD	0.777778				NTH	nb
f1	FSHD	0.84				NTH	nb
prevalence	FSHD	0.519231				NTH	nb
detection_rate	FSHD	0.403846				NTH	nb
detection_prevalence	FSHD	0.442308				NTH	nb
balanced_accuracy	FSHD	0.848889				NTH	nb
accuracy		0.903846	0.789703	0.968036	3.13933e-09	NTH	rf
kappa		0.807122				NTH	rf
mcnemar					1	NTH	rf
sensitivity	FSHD	0.925926				NTH	rf
specificity	FSHD	0.88				NTH	rf
pos_pred_value	FSHD	0.892857				NTH	rf
neg_pred_value	FSHD	0.916667				NTH	rf
precision	FSHD	0.892857				NTH	rf
recall	FSHD	0.925926				NTH	rf
f1	FSHD	0.909091				NTH	rf
prevalence	FSHD	0.519231				NTH	rf
detection_rate	FSHD	0.480769				NTH	rf
detection_prevalence	FSHD	0.538462				NTH	rf
balanced_accuracy	FSHD	0.902963				NTH	rf
accuracy		0.865385	0.742121	0.944121	1.46776e-07	NTH	rpart
kappa		0.72997				NTH	rpart
mcnemar					1	NTH	rpart
sensitivity	FSHD	0.888889				NTH	rpart
specificity	FSHD	0.84				NTH	rpart
pos_pred_value	FSHD	0.857143				NTH	rpart
neg_pred_value	FSHD	0.875				NTH	rpart
precision	FSHD	0.857143				NTH	rpart
recall	FSHD	0.888889				NTH	rpart
f1	FSHD	0.872727				NTH	rpart
prevalence	FSHD	0.519231				NTH	rpart
detection_rate	FSHD	0.461538				NTH	rpart
detection_prevalence	FSHD	0.538462				NTH	rpart
balanced_accuracy	FSHD	0.864444				NTH	rpart
accuracy		0.923077	0.814603	0.978643	3.44066e-10	NTH	C5.0
kappa		0.846381				NTH	C5.0
mcnemar					0.617075	NTH	C5.0
sensitivity	FSHD	0.888889				NTH	C5.0
specificity	FSHD	0.96				NTH	C5.0
pos_pred_value	FSHD	0.96				NTH	C5.0
neg_pred_value	FSHD	0.888889				NTH	C5.0
precision	FSHD	0.96				NTH	C5.0
recall	FSHD	0.888889				NTH	C5.0
f1	FSHD	0.923077				NTH	C5.0
prevalence	FSHD	0.519231				NTH	C5.0
detection_rate	FSHD	0.461538				NTH	C5.0
detection_prevalence	FSHD	0.480769				NTH	C5.0
balanced_accuracy	FSHD	0.924444				NTH	C5.0
accuracy		0.5	0.35812	0.64188	0.661752	NTH	knn
kappa		0.0131387				NTH	knn
mcnemar					0.0775562	NTH	knn
sensitivity	FSHD	0.333333				NTH	knn
specificity	FSHD	0.68				NTH	knn
pos_pred_value	FSHD	0.529412				NTH	knn
neg_pred_value	FSHD	0.485714				NTH	knn
precision	FSHD	0.529412				NTH	knn
recall	FSHD	0.333333				NTH	knn
f1	FSHD	0.409091				NTH	knn
prevalence	FSHD	0.519231				NTH	knn
detection_rate	FSHD	0.173077				NTH	knn
detection_prevalence	FSHD	0.326923				NTH	knn
balanced_accuracy	FSHD	0.506667				NTH	knn
accuracy		0.788462	0.652962	0.889388	5.62175e-05	NTH	earth
kappa		0.581871				NTH	earth
mcnemar					0.0158613	NTH	earth
sensitivity	FSHD	0.62963				NTH	earth
specificity	FSHD	0.96				NTH	earth
pos_pred_value	FSHD	0.944444				NTH	earth
neg_pred_value	FSHD	0.705882				NTH	earth
precision	FSHD	0.944444				NTH	earth
recall	FSHD	0.62963				NTH	earth
f1	FSHD	0.755556				NTH	earth
prevalence	FSHD	0.519231				NTH	earth
detection_rate	FSHD	0.326923				NTH	earth
detection_prevalence	FSHD	0.346154				NTH	earth
balanced_accuracy	FSHD	0.794815				NTH	earth
accuracy		0.846154	0.719189	0.931161	7.89286e-07	BOX	glmnet
kappa		0.693667				BOX	glmnet
mcnemar					0.288844	BOX	glmnet
sensitivity	FSHD	0.777778				BOX	glmnet
specificity	FSHD	0.92				BOX	glmnet
pos_pred_value	FSHD	0.913043				BOX	glmnet
neg_pred_value	FSHD	0.793103				BOX	glmnet
precision	FSHD	0.913043				BOX	glmnet
recall	FSHD	0.777778				BOX	glmnet
f1	FSHD	0.84				BOX	glmnet
prevalence	FSHD	0.519231				BOX	glmnet
detection_rate	FSHD	0.403846				BOX	glmnet
detection_prevalence	FSHD	0.442308				BOX	glmnet
balanced_accuracy	FSHD	0.848889				BOX	glmnet
accuracy		0.826923	0.69672	0.917674	3.69777e-06	BOX	svmLinear
kappa		0.655882				BOX	svmLinear
mcnemar					0.182422	BOX	svmLinear
sensitivity	FSHD	0.740741				BOX	svmLinear
specificity	FSHD	0.92				BOX	svmLinear
pos_pred_value	FSHD	0.909091				BOX	svmLinear
neg_pred_value	FSHD	0.766667				BOX	svmLinear
precision	FSHD	0.909091				BOX	svmLinear
recall	FSHD	0.740741				BOX	svmLinear
f1	FSHD	0.816327				BOX	svmLinear
prevalence	FSHD	0.519231				BOX	svmLinear
detection_rate	FSHD	0.384615				BOX	svmLinear
detection_prevalence	FSHD	0.423077				BOX	svmLinear
balanced_accuracy	FSHD	0.83037				BOX	svmLinear
accuracy		0.865385	0.742121	0.944121	1.46776e-07	BOX	svmRadial
kappa		0.72997				BOX	svmRadial
mcnemar					1	BOX	svmRadial
sensitivity	FSHD	0.888889				BOX	svmRadial
specificity	FSHD	0.84				BOX	svmRadial
pos_pred_value	FSHD	0.857143				BOX	svmRadial
neg_pred_value	FSHD	0.875				BOX	svmRadial
precision	FSHD	0.857143				BOX	svmRadial
recall	FSHD	0.888889				BOX	svmRadial
f1	FSHD	0.872727				BOX	svmRadial
prevalence	FSHD	0.519231				BOX	svmRadial
detection_rate	FSHD	0.461538				BOX	svmRadial
detection_prevalence	FSHD	0.538462				BOX	svmRadial
balanced_accuracy	FSHD	0.864444				BOX	svmRadial
accuracy		0.865385	0.742121	0.944121	1.46776e-07	BOX	svmLinearWeights2
kappa		0.730769				BOX	svmLinearWeights2
mcnemar					1	BOX	svmLinearWeights2
sensitivity	FSHD	0.851852				BOX	svmLinearWeights2
specificity	FSHD	0.88				BOX	svmLinearWeights2
pos_pred_value	FSHD	0.884615				BOX	svmLinearWeights2
neg_pred_value	FSHD	0.846154				BOX	svmLinearWeights2
precision	FSHD	0.884615				BOX	svmLinearWeights2
recall	FSHD	0.851852				BOX	svmLinearWeights2
f1	FSHD	0.867925				BOX	svmLinearWeights2
prevalence	FSHD	0.519231				BOX	svmLinearWeights2
detection_rate	FSHD	0.442308				BOX	svmLinearWeights2
detection_prevalence	FSHD	0.5				BOX	svmLinearWeights2
balanced_accuracy	FSHD	0.865926				BOX	svmLinearWeights2
accuracy		0.846154	0.719189	0.931161	7.89286e-07	BOX	nb
kappa		0.693667				BOX	nb
mcnemar					0.288844	BOX	nb
sensitivity	FSHD	0.777778				BOX	nb
specificity	FSHD	0.92				BOX	nb
pos_pred_value	FSHD	0.913043				BOX	nb
neg_pred_value	FSHD	0.793103				BOX	nb
precision	FSHD	0.913043				BOX	nb
recall	FSHD	0.777778				BOX	nb
f1	FSHD	0.84				BOX	nb
prevalence	FSHD	0.519231				BOX	nb
detection_rate	FSHD	0.403846				BOX	nb
detection_prevalence	FSHD	0.442308				BOX	nb
balanced_accuracy	FSHD	0.848889				BOX	nb
accuracy		0.903846	0.789703	0.968036	3.13933e-09	BOX	rf
kappa		0.807122				BOX	rf
mcnemar					1	BOX	rf
sensitivity	FSHD	0.925926				BOX	rf
specificity	FSHD	0.88				BOX	rf
pos_pred_value	FSHD	0.892857				BOX	rf
neg_pred_value	FSHD	0.916667				BOX	rf
precision	FSHD	0.892857				BOX	rf
recall	FSHD	0.925926				BOX	rf
f1	FSHD	0.909091				BOX	rf
prevalence	FSHD	0.519231				BOX	rf
detection_rate	FSHD	0.480769				BOX	rf
detection_prevalence	FSHD	0.538462				BOX	rf
balanced_accuracy	FSHD	0.902963				BOX	rf
accuracy		0.923077	0.814603	0.978643	3.44066e-10	BOX	ctree2
kappa		0.846381				BOX	ctree2
mcnemar					0.617075	BOX	ctree2
sensitivity	FSHD	0.888889				BOX	ctree2
specificity	FSHD	0.96				BOX	ctree2
pos_pred_value	FSHD	0.96				BOX	ctree2
neg_pred_value	FSHD	0.888889				BOX	ctree2
precision	FSHD	0.96				BOX	ctree2
recall	FSHD	0.888889				BOX	ctree2
f1	FSHD	0.923077				BOX	ctree2
prevalence	FSHD	0.519231				BOX	ctree2
detection_rate	FSHD	0.461538				BOX	ctree2
detection_prevalence	FSHD	0.480769				BOX	ctree2
balanced_accuracy	FSHD	0.924444				BOX	ctree2
accuracy		0.865385	0.742121	0.944121	1.46776e-07	BOX	rpart
kappa		0.72997				BOX	rpart
mcnemar					1	BOX	rpart
sensitivity	FSHD	0.888889				BOX	rpart
specificity	FSHD	0.84				BOX	rpart
pos_pred_value	FSHD	0.857143				BOX	rpart
neg_pred_value	FSHD	0.875				BOX	rpart
precision	FSHD	0.857143				BOX	rpart
recall	FSHD	0.888889				BOX	rpart
f1	FSHD	0.872727				BOX	rpart
prevalence	FSHD	0.519231				BOX	rpart
detection_rate	FSHD	0.461538				BOX	rpart
detection_prevalence	FSHD	0.538462				BOX	rpart
balanced_accuracy	FSHD	0.864444				BOX	rpart
accuracy		0.923077	0.814603	0.978643	3.44066e-10	BOX	C5.0
kappa		0.846381				BOX	C5.0
mcnemar					0.617075	BOX	C5.0
sensitivity	FSHD	0.888889				BOX	C5.0
specificity	FSHD	0.96				BOX	C5.0
pos_pred_value	FSHD	0.96				BOX	C5.0
neg_pred_value	FSHD	0.888889				BOX	C5.0
precision	FSHD	0.96				BOX	C5.0
recall	FSHD	0.888889				BOX	C5.0
f1	FSHD	0.923077				BOX	C5.0
prevalence	FSHD	0.519231				BOX	C5.0
detection_rate	FSHD	0.461538				BOX	C5.0
detection_prevalence	FSHD	0.480769				BOX	C5.0
balanced_accuracy	FSHD	0.924444				BOX	C5.0
accuracy		0.826923	0.69672	0.917674	3.69777e-06	BOX	knn
kappa		0.651786				BOX	knn
mcnemar					0.504985	BOX	knn
sensitivity	FSHD	0.888889				BOX	knn
specificity	FSHD	0.76				BOX	knn
pos_pred_value	FSHD	0.8				BOX	knn
neg_pred_value	FSHD	0.863636				BOX	knn
precision	FSHD	0.8				BOX	knn
recall	FSHD	0.888889				BOX	knn
f1	FSHD	0.842105				BOX	knn
prevalence	FSHD	0.519231				BOX	knn
detection_rate	FSHD	0.461538				BOX	knn
detection_prevalence	FSHD	0.576923				BOX	knn
balanced_accuracy	FSHD	0.824444				BOX	knn
accuracy		0.846154	0.719189	0.931161	7.89286e-07	BOX	earth
kappa		0.692762				BOX	earth
mcnemar					0.723674	BOX	earth
sensitivity	FSHD	0.814815				BOX	earth
specificity	FSHD	0.88				BOX	earth
pos_pred_value	FSHD	0.88				BOX	earth
neg_pred_value	FSHD	0.814815				BOX	earth
precision	FSHD	0.88				BOX	earth
recall	FSHD	0.814815				BOX	earth
f1	FSHD	0.846154				BOX	earth
prevalence	FSHD	0.519231				BOX	earth
detection_rate	FSHD	0.423077				BOX	earth
detection_prevalence	FSHD	0.480769				BOX	earth
balanced_accuracy	FSHD	0.847407				BOX	earth
accuracy		0.865385	0.742121	0.944121	1.46776e-07	YEO	glmnet
kappa		0.731563				YEO	glmnet
mcnemar					0.449692	YEO	glmnet
sensitivity	FSHD	0.814815				YEO	glmnet
specificity	FSHD	0.92				YEO	glmnet
pos_pred_value	FSHD	0.916667				YEO	glmnet
neg_pred_value	FSHD	0.821429				YEO	glmnet
precision	FSHD	0.916667				YEO	glmnet
recall	FSHD	0.814815				YEO	glmnet
f1	FSHD	0.862745				YEO	glmnet
prevalence	FSHD	0.519231				YEO	glmnet
detection_rate	FSHD	0.423077				YEO	glmnet
detection_prevalence	FSHD	0.461538				YEO	glmnet
balanced_accuracy	FSHD	0.867407				YEO	glmnet
accuracy		0.846154	0.719189	0.931161	7.89286e-07	YEO	svmLinear
kappa		0.694567				YEO	svmLinear
mcnemar					0.0770999	YEO	svmLinear
sensitivity	FSHD	0.740741				YEO	svmLinear
specificity	FSHD	0.96				YEO	svmLinear
pos_pred_value	FSHD	0.952381				YEO	svmLinear
neg_pred_value	FSHD	0.774194				YEO	svmLinear
precision	FSHD	0.952381				YEO	svmLinear
recall	FSHD	0.740741				YEO	svmLinear
f1	FSHD	0.833333				YEO	svmLinear
prevalence	FSHD	0.519231				YEO	svmLinear
detection_rate	FSHD	0.384615				YEO	svmLinear
detection_prevalence	FSHD	0.403846				YEO	svmLinear
balanced_accuracy	FSHD	0.85037				YEO	svmLinear
accuracy		0.846154	0.719189	0.931161	7.89286e-07	YEO	svmRadial
kappa		0.690936				YEO	svmRadial
mcnemar					0.723674	YEO	svmRadial
sensitivity	FSHD	0.888889				YEO	svmRadial
specificity	FSHD	0.8				YEO	svmRadial
pos_pred_value	FSHD	0.827586				YEO	svmRadial
neg_pred_value	FSHD	0.869565				YEO	svmRadial
precision	FSHD	0.827586				YEO	svmRadial
recall	FSHD	0.888889				YEO	svmRadial
f1	FSHD	0.857143				YEO	svmRadial
prevalence	FSHD	0.519231				YEO	svmRadial
detection_rate	FSHD	0.461538				YEO	svmRadial
detection_prevalence	FSHD	0.557692				YEO	svmRadial
balanced_accuracy	FSHD	0.844444				YEO	svmRadial
accuracy		0.480769	0.340119	0.623687	0.756228	YEO	svmLinearWeights2
kappa		0				YEO	svmLinearWeights2
mcnemar					5.62396e-07	YEO	svmLinearWeights2
sensitivity	FSHD	0				YEO	svmLinearWeights2
specificity	FSHD	1				YEO	svmLinearWeights2
pos_pred_value	FSHD	#NUM!				YEO	svmLinearWeights2
neg_pred_value	FSHD	0.480769				YEO	svmLinearWeights2
precision	FSHD					YEO	svmLinearWeights2
recall	FSHD	0				YEO	svmLinearWeights2
f1	FSHD					YEO	svmLinearWeights2
prevalence	FSHD	0.519231				YEO	svmLinearWeights2
detection_rate	FSHD	0				YEO	svmLinearWeights2
detection_prevalence	FSHD	0				YEO	svmLinearWeights2
balanced_accuracy	FSHD	0.5				YEO	svmLinearWeights2
accuracy		0.846154	0.719189	0.931161	7.89286e-07	YEO	nb
kappa		0.693667				YEO	nb
mcnemar					0.288844	YEO	nb
sensitivity	FSHD	0.777778				YEO	nb
specificity	FSHD	0.92				YEO	nb
pos_pred_value	FSHD	0.913043				YEO	nb
neg_pred_value	FSHD	0.793103				YEO	nb
precision	FSHD	0.913043				YEO	nb
recall	FSHD	0.777778				YEO	nb
f1	FSHD	0.84				YEO	nb
prevalence	FSHD	0.519231				YEO	nb
detection_rate	FSHD	0.403846				YEO	nb
detection_prevalence	FSHD	0.442308				YEO	nb
balanced_accuracy	FSHD	0.848889				YEO	nb
accuracy		0.903846	0.789703	0.968036	3.13933e-09	YEO	rf
kappa		0.807122				YEO	rf
mcnemar					1	YEO	rf
sensitivity	FSHD	0.925926				YEO	rf
specificity	FSHD	0.88				YEO	rf
pos_pred_value	FSHD	0.892857				YEO	rf
neg_pred_value	FSHD	0.916667				YEO	rf
precision	FSHD	0.892857				YEO	rf
recall	FSHD	0.925926				YEO	rf
f1	FSHD	0.909091				YEO	rf
prevalence	FSHD	0.519231				YEO	rf
detection_rate	FSHD	0.480769				YEO	rf
detection_prevalence	FSHD	0.538462				YEO	rf
balanced_accuracy	FSHD	0.902963				YEO	rf
accuracy		0.942308	0.840527	0.987941	2.95987e-11	YEO	ctree2
kappa		0.884615				YEO	ctree2
mcnemar					1	YEO	ctree2
sensitivity	FSHD	0.925926				YEO	ctree2
specificity	FSHD	0.96				YEO	ctree2
pos_pred_value	FSHD	0.961538				YEO	ctree2
neg_pred_value	FSHD	0.923077				YEO	ctree2
precision	FSHD	0.961538				YEO	ctree2
recall	FSHD	0.925926				YEO	ctree2
f1	FSHD	0.943396				YEO	ctree2
prevalence	FSHD	0.519231				YEO	ctree2
detection_rate	FSHD	0.480769				YEO	ctree2
detection_prevalence	FSHD	0.5				YEO	ctree2
balanced_accuracy	FSHD	0.942963				YEO	ctree2
accuracy		0.865385	0.742121	0.944121	1.46776e-07	YEO	rpart
kappa		0.72997				YEO	rpart
mcnemar					1	YEO	rpart
sensitivity	FSHD	0.888889				YEO	rpart
specificity	FSHD	0.84				YEO	rpart
pos_pred_value	FSHD	0.857143				YEO	rpart
neg_pred_value	FSHD	0.875				YEO	rpart
precision	FSHD	0.857143				YEO	rpart
recall	FSHD	0.888889				YEO	rpart
f1	FSHD	0.872727				YEO	rpart
prevalence	FSHD	0.519231				YEO	rpart
detection_rate	FSHD	0.461538				YEO	rpart
detection_prevalence	FSHD	0.538462				YEO	rpart
balanced_accuracy	FSHD	0.864444				YEO	rpart
accuracy		0.923077	0.814603	0.978643	3.44066e-10	YEO	C5.0
kappa		0.846381				YEO	C5.0
mcnemar					0.617075	YEO	C5.0
sensitivity	FSHD	0.888889				YEO	C5.0
specificity	FSHD	0.96				YEO	C5.0
pos_pred_value	FSHD	0.96				YEO	C5.0
neg_pred_value	FSHD	0.888889				YEO	C5.0
precision	FSHD	0.96				YEO	C5.0
recall	FSHD	0.888889				YEO	C5.0
f1	FSHD	0.923077				YEO	C5.0
prevalence	FSHD	0.519231				YEO	C5.0
detection_rate	FSHD	0.461538				YEO	C5.0
detection_prevalence	FSHD	0.480769				YEO	C5.0
balanced_accuracy	FSHD	0.924444				YEO	C5.0
accuracy		0.5	0.35812	0.64188	0.661752	YEO	knn
kappa		0.0131387				YEO	knn
mcnemar					0.0775562	YEO	knn
sensitivity	FSHD	0.333333				YEO	knn
specificity	FSHD	0.68				YEO	knn
pos_pred_value	FSHD	0.529412				YEO	knn
neg_pred_value	FSHD	0.485714				YEO	knn
precision	FSHD	0.529412				YEO	knn
recall	FSHD	0.333333				YEO	knn
f1	FSHD	0.409091				YEO	knn
prevalence	FSHD	0.519231				YEO	knn
detection_rate	FSHD	0.173077				YEO	knn
detection_prevalence	FSHD	0.326923				YEO	knn
balanced_accuracy	FSHD	0.506667				YEO	knn
accuracy		0.788462	0.652962	0.889388	5.62175e-05	YEO	earth
kappa		0.581871				YEO	earth
mcnemar					0.0158613	YEO	earth
sensitivity	FSHD	0.62963				YEO	earth
specificity	FSHD	0.96				YEO	earth
pos_pred_value	FSHD	0.944444				YEO	earth
neg_pred_value	FSHD	0.705882				YEO	earth
precision	FSHD	0.944444				YEO	earth
recall	FSHD	0.62963				YEO	earth
f1	FSHD	0.755556				YEO	earth
prevalence	FSHD	0.519231				YEO	earth
detection_rate	FSHD	0.326923				YEO	earth
detection_prevalence	FSHD	0.346154				YEO	earth
balanced_accuracy	FSHD	0.794815				YEO	earth
accuracy		0.788462	0.652962	0.889388	5.62175e-05	PWR	glmnet
kappa		0.578171				PWR	glmnet
mcnemar					0.546494	PWR	glmnet
sensitivity	FSHD	0.740741				PWR	glmnet
specificity	FSHD	0.84				PWR	glmnet
pos_pred_value	FSHD	0.833333				PWR	glmnet
neg_pred_value	FSHD	0.75				PWR	glmnet
precision	FSHD	0.833333				PWR	glmnet
recall	FSHD	0.740741				PWR	glmnet
f1	FSHD	0.784314				PWR	glmnet
prevalence	FSHD	0.519231				PWR	glmnet
detection_rate	FSHD	0.384615				PWR	glmnet
detection_prevalence	FSHD	0.461538				PWR	glmnet
balanced_accuracy	FSHD	0.79037				PWR	glmnet
accuracy		0.807692	0.674659	0.903732	1.52778e-05	PWR	svmLinear
kappa		0.617084				PWR	svmLinear
mcnemar					0.342782	PWR	svmLinear
sensitivity	FSHD	0.740741				PWR	svmLinear
specificity	FSHD	0.88				PWR	svmLinear
pos_pred_value	FSHD	0.869565				PWR	svmLinear
neg_pred_value	FSHD	0.758621				PWR	svmLinear
precision	FSHD	0.869565				PWR	svmLinear
recall	FSHD	0.740741				PWR	svmLinear
f1	FSHD	0.8				PWR	svmLinear
prevalence	FSHD	0.519231				PWR	svmLinear
detection_rate	FSHD	0.384615				PWR	svmLinear
detection_prevalence	FSHD	0.442308				PWR	svmLinear
balanced_accuracy	FSHD	0.81037				PWR	svmLinear
accuracy		0.865385	0.742121	0.944121	1.46776e-07	PWR	svmRadial
kappa		0.72997				PWR	svmRadial
mcnemar					1	PWR	svmRadial
sensitivity	FSHD	0.888889				PWR	svmRadial
specificity	FSHD	0.84				PWR	svmRadial
pos_pred_value	FSHD	0.857143				PWR	svmRadial
neg_pred_value	FSHD	0.875				PWR	svmRadial
precision	FSHD	0.857143				PWR	svmRadial
recall	FSHD	0.888889				PWR	svmRadial
f1	FSHD	0.872727				PWR	svmRadial
prevalence	FSHD	0.519231				PWR	svmRadial
detection_rate	FSHD	0.461538				PWR	svmRadial
detection_prevalence	FSHD	0.538462				PWR	svmRadial
balanced_accuracy	FSHD	0.864444				PWR	svmRadial
accuracy		0.884615	0.765592	0.956459	2.34136e-08	PWR	svmLinearWeights2
kappa		0.768202				PWR	svmLinearWeights2
mcnemar					0.683091	PWR	svmLinearWeights2
sensitivity	FSHD	0.925926				PWR	svmLinearWeights2
specificity	FSHD	0.84				PWR	svmLinearWeights2
pos_pred_value	FSHD	0.862069				PWR	svmLinearWeights2
neg_pred_value	FSHD	0.913043				PWR	svmLinearWeights2
precision	FSHD	0.862069				PWR	svmLinearWeights2
recall	FSHD	0.925926				PWR	svmLinearWeights2
f1	FSHD	0.892857				PWR	svmLinearWeights2
prevalence	FSHD	0.519231				PWR	svmLinearWeights2
detection_rate	FSHD	0.480769				PWR	svmLinearWeights2
detection_prevalence	FSHD	0.557692				PWR	svmLinearWeights2
balanced_accuracy	FSHD	0.882963				PWR	svmLinearWeights2
accuracy		0.826923	0.69672	0.917674	3.69777e-06	PWR	nb
kappa		0.654867				PWR	nb
mcnemar					0.504985	PWR	nb
sensitivity	FSHD	0.777778				PWR	nb
specificity	FSHD	0.88				PWR	nb
pos_pred_value	FSHD	0.875				PWR	nb
neg_pred_value	FSHD	0.785714				PWR	nb
precision	FSHD	0.875				PWR	nb
recall	FSHD	0.777778				PWR	nb
f1	FSHD	0.823529				PWR	nb
prevalence	FSHD	0.519231				PWR	nb
detection_rate	FSHD	0.403846				PWR	nb
detection_prevalence	FSHD	0.461538				PWR	nb
balanced_accuracy	FSHD	0.828889				PWR	nb
accuracy		0.923077	0.814603	0.978643	3.44066e-10	PWR	rf
kappa		0.845926				PWR	rf
mcnemar					1	PWR	rf
sensitivity	FSHD	0.925926				PWR	rf
specificity	FSHD	0.92				PWR	rf
pos_pred_value	FSHD	0.925926				PWR	rf
neg_pred_value	FSHD	0.92				PWR	rf
precision	FSHD	0.925926				PWR	rf
recall	FSHD	0.925926				PWR	rf
f1	FSHD	0.925926				PWR	rf
prevalence	FSHD	0.519231				PWR	rf
detection_rate	FSHD	0.480769				PWR	rf
detection_prevalence	FSHD	0.519231				PWR	rf
balanced_accuracy	FSHD	0.922963				PWR	rf
accuracy		0.923077	0.814603	0.978643	3.44066e-10	PWR	ctree2
kappa		0.846381				PWR	ctree2
mcnemar					0.617075	PWR	ctree2
sensitivity	FSHD	0.888889				PWR	ctree2
specificity	FSHD	0.96				PWR	ctree2
pos_pred_value	FSHD	0.96				PWR	ctree2
neg_pred_value	FSHD	0.888889				PWR	ctree2
precision	FSHD	0.96				PWR	ctree2
recall	FSHD	0.888889				PWR	ctree2
f1	FSHD	0.923077				PWR	ctree2
prevalence	FSHD	0.519231				PWR	ctree2
detection_rate	FSHD	0.461538				PWR	ctree2
detection_prevalence	FSHD	0.480769				PWR	ctree2
balanced_accuracy	FSHD	0.924444				PWR	ctree2
accuracy		0.865385	0.742121	0.944121	1.46776e-07	PWR	rpart
kappa		0.72997				PWR	rpart
mcnemar					1	PWR	rpart
sensitivity	FSHD	0.888889				PWR	rpart
specificity	FSHD	0.84				PWR	rpart
pos_pred_value	FSHD	0.857143				PWR	rpart
neg_pred_value	FSHD	0.875				PWR	rpart
precision	FSHD	0.857143				PWR	rpart
recall	FSHD	0.888889				PWR	rpart
f1	FSHD	0.872727				PWR	rpart
prevalence	FSHD	0.519231				PWR	rpart
detection_rate	FSHD	0.461538				PWR	rpart
detection_prevalence	FSHD	0.538462				PWR	rpart
balanced_accuracy	FSHD	0.864444				PWR	rpart
accuracy		0.923077	0.814603	0.978643	3.44066e-10	PWR	C5.0
kappa		0.845926				PWR	C5.0
mcnemar					1	PWR	C5.0
sensitivity	FSHD	0.925926				PWR	C5.0
specificity	FSHD	0.92				PWR	C5.0
pos_pred_value	FSHD	0.925926				PWR	C5.0
neg_pred_value	FSHD	0.92				PWR	C5.0
precision	FSHD	0.925926				PWR	C5.0
recall	FSHD	0.925926				PWR	C5.0
f1	FSHD	0.925926				PWR	C5.0
prevalence	FSHD	0.519231				PWR	C5.0
detection_rate	FSHD	0.480769				PWR	C5.0
detection_prevalence	FSHD	0.519231				PWR	C5.0
balanced_accuracy	FSHD	0.922963				PWR	C5.0
accuracy		0.826923	0.69672	0.917674	3.69777e-06	PWR	knn
kappa		0.654867				PWR	knn
mcnemar					0.504985	PWR	knn
sensitivity	FSHD	0.777778				PWR	knn
specificity	FSHD	0.88				PWR	knn
pos_pred_value	FSHD	0.875				PWR	knn
neg_pred_value	FSHD	0.785714				PWR	knn
precision	FSHD	0.875				PWR	knn
recall	FSHD	0.777778				PWR	knn
f1	FSHD	0.823529				PWR	knn
prevalence	FSHD	0.519231				PWR	knn
detection_rate	FSHD	0.403846				PWR	knn
detection_prevalence	FSHD	0.461538				PWR	knn
balanced_accuracy	FSHD	0.828889				PWR	knn
accuracy		0.826923	0.69672	0.917674	3.69777e-06	PWR	earth
kappa		0.654867				PWR	earth
mcnemar					0.504985	PWR	earth
sensitivity	FSHD	0.777778				PWR	earth
specificity	FSHD	0.88				PWR	earth
pos_pred_value	FSHD	0.875				PWR	earth
neg_pred_value	FSHD	0.785714				PWR	earth
precision	FSHD	0.875				PWR	earth
recall	FSHD	0.777778				PWR	earth
f1	FSHD	0.823529				PWR	earth
prevalence	FSHD	0.519231				PWR	earth
detection_rate	FSHD	0.403846				PWR	earth
detection_prevalence	FSHD	0.461538				PWR	earth
balanced_accuracy	FSHD	0.828889				PWR	earth
accuracy		0.865385	0.742121	0.944121	1.46776e-07	CTR	glmnet
kappa		0.731563				CTR	glmnet
mcnemar					0.449692	CTR	glmnet
sensitivity	FSHD	0.814815				CTR	glmnet
specificity	FSHD	0.92				CTR	glmnet
pos_pred_value	FSHD	0.916667				CTR	glmnet
neg_pred_value	FSHD	0.821429				CTR	glmnet
precision	FSHD	0.916667				CTR	glmnet
recall	FSHD	0.814815				CTR	glmnet
f1	FSHD	0.862745				CTR	glmnet
prevalence	FSHD	0.519231				CTR	glmnet
detection_rate	FSHD	0.423077				CTR	glmnet
detection_prevalence	FSHD	0.461538				CTR	glmnet
balanced_accuracy	FSHD	0.867407				CTR	glmnet
accuracy		0.846154	0.719189	0.931161	7.89286e-07	CTR	svmLinear
kappa		0.694567				CTR	svmLinear
mcnemar					0.0770999	CTR	svmLinear
sensitivity	FSHD	0.740741				CTR	svmLinear
specificity	FSHD	0.96				CTR	svmLinear
pos_pred_value	FSHD	0.952381				CTR	svmLinear
neg_pred_value	FSHD	0.774194				CTR	svmLinear
precision	FSHD	0.952381				CTR	svmLinear
recall	FSHD	0.740741				CTR	svmLinear
f1	FSHD	0.833333				CTR	svmLinear
prevalence	FSHD	0.519231				CTR	svmLinear
detection_rate	FSHD	0.384615				CTR	svmLinear
detection_prevalence	FSHD	0.403846				CTR	svmLinear
balanced_accuracy	FSHD	0.85037				CTR	svmLinear
accuracy		0.846154	0.719189	0.931161	7.89286e-07	CTR	svmRadial
kappa		0.690936				CTR	svmRadial
mcnemar					0.723674	CTR	svmRadial
sensitivity	FSHD	0.888889				CTR	svmRadial
specificity	FSHD	0.8				CTR	svmRadial
pos_pred_value	FSHD	0.827586				CTR	svmRadial
neg_pred_value	FSHD	0.869565				CTR	svmRadial
precision	FSHD	0.827586				CTR	svmRadial
recall	FSHD	0.888889				CTR	svmRadial
f1	FSHD	0.857143				CTR	svmRadial
prevalence	FSHD	0.519231				CTR	svmRadial
detection_rate	FSHD	0.461538				CTR	svmRadial
detection_prevalence	FSHD	0.557692				CTR	svmRadial
balanced_accuracy	FSHD	0.844444				CTR	svmRadial
accuracy		0.846154	0.719189	0.931161	7.89286e-07	CTR	svmLinearWeights2
kappa		0.694567				CTR	svmLinearWeights2
mcnemar					0.0770999	CTR	svmLinearWeights2
sensitivity	FSHD	0.740741				CTR	svmLinearWeights2
specificity	FSHD	0.96				CTR	svmLinearWeights2
pos_pred_value	FSHD	0.952381				CTR	svmLinearWeights2
neg_pred_value	FSHD	0.774194				CTR	svmLinearWeights2
precision	FSHD	0.952381				CTR	svmLinearWeights2
recall	FSHD	0.740741				CTR	svmLinearWeights2
f1	FSHD	0.833333				CTR	svmLinearWeights2
prevalence	FSHD	0.519231				CTR	svmLinearWeights2
detection_rate	FSHD	0.384615				CTR	svmLinearWeights2
detection_prevalence	FSHD	0.403846				CTR	svmLinearWeights2
balanced_accuracy	FSHD	0.85037				CTR	svmLinearWeights2
accuracy		0.846154	0.719189	0.931161	7.89286e-07	CTR	nb
kappa		0.693667				CTR	nb
mcnemar					0.288844	CTR	nb
sensitivity	FSHD	0.777778				CTR	nb
specificity	FSHD	0.92				CTR	nb
pos_pred_value	FSHD	0.913043				CTR	nb
neg_pred_value	FSHD	0.793103				CTR	nb
precision	FSHD	0.913043				CTR	nb
recall	FSHD	0.777778				CTR	nb
f1	FSHD	0.84				CTR	nb
prevalence	FSHD	0.519231				CTR	nb
detection_rate	FSHD	0.403846				CTR	nb
detection_prevalence	FSHD	0.442308				CTR	nb
balanced_accuracy	FSHD	0.848889				CTR	nb
accuracy		0.903846	0.789703	0.968036	3.13933e-09	CTR	rf
kappa		0.807122				CTR	rf
mcnemar					1	CTR	rf
sensitivity	FSHD	0.925926				CTR	rf
specificity	FSHD	0.88				CTR	rf
pos_pred_value	FSHD	0.892857				CTR	rf
neg_pred_value	FSHD	0.916667				CTR	rf
precision	FSHD	0.892857				CTR	rf
recall	FSHD	0.925926				CTR	rf
f1	FSHD	0.909091				CTR	rf
prevalence	FSHD	0.519231				CTR	rf
detection_rate	FSHD	0.480769				CTR	rf
detection_prevalence	FSHD	0.538462				CTR	rf
balanced_accuracy	FSHD	0.902963				CTR	rf
accuracy		0.942308	0.840527	0.987941	2.95987e-11	CTR	ctree2
kappa		0.884615				CTR	ctree2
mcnemar					1	CTR	ctree2
sensitivity	FSHD	0.925926				CTR	ctree2
specificity	FSHD	0.96				CTR	ctree2
pos_pred_value	FSHD	0.961538				CTR	ctree2
neg_pred_value	FSHD	0.923077				CTR	ctree2
precision	FSHD	0.961538				CTR	ctree2
recall	FSHD	0.925926				CTR	ctree2
f1	FSHD	0.943396				CTR	ctree2
prevalence	FSHD	0.519231				CTR	ctree2
detection_rate	FSHD	0.480769				CTR	ctree2
detection_prevalence	FSHD	0.5				CTR	ctree2
balanced_accuracy	FSHD	0.942963				CTR	ctree2
accuracy		0.865385	0.742121	0.944121	1.46776e-07	CTR	rpart
kappa		0.72997				CTR	rpart
mcnemar					1	CTR	rpart
sensitivity	FSHD	0.888889				CTR	rpart
specificity	FSHD	0.84				CTR	rpart
pos_pred_value	FSHD	0.857143				CTR	rpart
neg_pred_value	FSHD	0.875				CTR	rpart
precision	FSHD	0.857143				CTR	rpart
recall	FSHD	0.888889				CTR	rpart
f1	FSHD	0.872727				CTR	rpart
prevalence	FSHD	0.519231				CTR	rpart
detection_rate	FSHD	0.461538				CTR	rpart
detection_prevalence	FSHD	0.538462				CTR	rpart
balanced_accuracy	FSHD	0.864444				CTR	rpart
accuracy		0.923077	0.814603	0.978643	3.44066e-10	CTR	C5.0
kappa		0.846381				CTR	C5.0
mcnemar					0.617075	CTR	C5.0
sensitivity	FSHD	0.888889				CTR	C5.0
specificity	FSHD	0.96				CTR	C5.0
pos_pred_value	FSHD	0.96				CTR	C5.0
neg_pred_value	FSHD	0.888889				CTR	C5.0
precision	FSHD	0.96				CTR	C5.0
recall	FSHD	0.888889				CTR	C5.0
f1	FSHD	0.923077				CTR	C5.0
prevalence	FSHD	0.519231				CTR	C5.0
detection_rate	FSHD	0.461538				CTR	C5.0
detection_prevalence	FSHD	0.480769				CTR	C5.0
balanced_accuracy	FSHD	0.924444				CTR	C5.0
accuracy		0.807692	0.674659	0.903732	1.52778e-05	CTR	knn
kappa		0.61367				CTR	knn
mcnemar					0.75183	CTR	knn
sensitivity	FSHD	0.851852				CTR	knn
specificity	FSHD	0.76				CTR	knn
pos_pred_value	FSHD	0.793103				CTR	knn
neg_pred_value	FSHD	0.826087				CTR	knn
precision	FSHD	0.793103				CTR	knn
recall	FSHD	0.851852				CTR	knn
f1	FSHD	0.821429				CTR	knn
prevalence	FSHD	0.519231				CTR	knn
detection_rate	FSHD	0.442308				CTR	knn
detection_prevalence	FSHD	0.557692				CTR	knn
balanced_accuracy	FSHD	0.805926				CTR	knn
accuracy		0.788462	0.652962	0.889388	5.62175e-05	CTR	earth
kappa		0.581871				CTR	earth
mcnemar					0.0158613	CTR	earth
sensitivity	FSHD	0.62963				CTR	earth
specificity	FSHD	0.96				CTR	earth
pos_pred_value	FSHD	0.944444				CTR	earth
neg_pred_value	FSHD	0.705882				CTR	earth
precision	FSHD	0.944444				CTR	earth
recall	FSHD	0.62963				CTR	earth
f1	FSHD	0.755556				CTR	earth
prevalence	FSHD	0.519231				CTR	earth
detection_rate	FSHD	0.326923				CTR	earth
detection_prevalence	FSHD	0.346154				CTR	earth
balanced_accuracy	FSHD	0.794815				CTR	earth
accuracy		0.846154	0.719189	0.931161	7.89286e-07	PCA	glmnet
kappa		0.693667				PCA	glmnet
mcnemar					0.288844	PCA	glmnet
sensitivity	FSHD	0.777778				PCA	glmnet
specificity	FSHD	0.92				PCA	glmnet
pos_pred_value	FSHD	0.913043				PCA	glmnet
neg_pred_value	FSHD	0.793103				PCA	glmnet
precision	FSHD	0.913043				PCA	glmnet
recall	FSHD	0.777778				PCA	glmnet
f1	FSHD	0.84				PCA	glmnet
prevalence	FSHD	0.519231				PCA	glmnet
detection_rate	FSHD	0.403846				PCA	glmnet
detection_prevalence	FSHD	0.442308				PCA	glmnet
balanced_accuracy	FSHD	0.848889				PCA	glmnet
accuracy		0.826923	0.69672	0.917674	3.69777e-06	PCA	svmLinear
kappa		0.654867				PCA	svmLinear
mcnemar					0.504985	PCA	svmLinear
sensitivity	FSHD	0.777778				PCA	svmLinear
specificity	FSHD	0.88				PCA	svmLinear
pos_pred_value	FSHD	0.875				PCA	svmLinear
neg_pred_value	FSHD	0.785714				PCA	svmLinear
precision	FSHD	0.875				PCA	svmLinear
recall	FSHD	0.777778				PCA	svmLinear
f1	FSHD	0.823529				PCA	svmLinear
prevalence	FSHD	0.519231				PCA	svmLinear
detection_rate	FSHD	0.403846				PCA	svmLinear
detection_prevalence	FSHD	0.461538				PCA	svmLinear
balanced_accuracy	FSHD	0.828889				PCA	svmLinear
accuracy		0.826923	0.69672	0.917674	3.69777e-06	PCA	svmRadial
kappa		0.655882				PCA	svmRadial
mcnemar					0.182422	PCA	svmRadial
sensitivity	FSHD	0.740741				PCA	svmRadial
specificity	FSHD	0.92				PCA	svmRadial
pos_pred_value	FSHD	0.909091				PCA	svmRadial
neg_pred_value	FSHD	0.766667				PCA	svmRadial
precision	FSHD	0.909091				PCA	svmRadial
recall	FSHD	0.740741				PCA	svmRadial
f1	FSHD	0.816327				PCA	svmRadial
prevalence	FSHD	0.519231				PCA	svmRadial
detection_rate	FSHD	0.384615				PCA	svmRadial
detection_prevalence	FSHD	0.423077				PCA	svmRadial
balanced_accuracy	FSHD	0.83037				PCA	svmRadial
accuracy		0.807692	0.674659	0.903732	1.52778e-05	PCA	svmLinearWeights2
kappa		0.617084				PCA	svmLinearWeights2
mcnemar					0.342782	PCA	svmLinearWeights2
sensitivity	FSHD	0.740741				PCA	svmLinearWeights2
specificity	FSHD	0.88				PCA	svmLinearWeights2
pos_pred_value	FSHD	0.869565				PCA	svmLinearWeights2
neg_pred_value	FSHD	0.758621				PCA	svmLinearWeights2
precision	FSHD	0.869565				PCA	svmLinearWeights2
recall	FSHD	0.740741				PCA	svmLinearWeights2
f1	FSHD	0.8				PCA	svmLinearWeights2
prevalence	FSHD	0.519231				PCA	svmLinearWeights2
detection_rate	FSHD	0.384615				PCA	svmLinearWeights2
detection_prevalence	FSHD	0.442308				PCA	svmLinearWeights2
balanced_accuracy	FSHD	0.81037				PCA	svmLinearWeights2
accuracy		0.769231	0.631597	0.874684	0.000185733	PCA	nb
kappa		0.537778				PCA	nb
mcnemar					1	PCA	nb
sensitivity	FSHD	0.777778				PCA	nb
specificity	FSHD	0.76				PCA	nb
pos_pred_value	FSHD	0.777778				PCA	nb
neg_pred_value	FSHD	0.76				PCA	nb
precision	FSHD	0.777778				PCA	nb
recall	FSHD	0.777778				PCA	nb
f1	FSHD	0.777778				PCA	nb
prevalence	FSHD	0.519231				PCA	nb
detection_rate	FSHD	0.403846				PCA	nb
detection_prevalence	FSHD	0.519231				PCA	nb
balanced_accuracy	FSHD	0.768889				PCA	nb
accuracy		0.788462	0.652962	0.889388	5.62175e-05	PCA	rf
kappa		0.578171				PCA	rf
mcnemar					0.546494	PCA	rf
sensitivity	FSHD	0.740741				PCA	rf
specificity	FSHD	0.84				PCA	rf
pos_pred_value	FSHD	0.833333				PCA	rf
neg_pred_value	FSHD	0.75				PCA	rf
precision	FSHD	0.833333				PCA	rf
recall	FSHD	0.740741				PCA	rf
f1	FSHD	0.784314				PCA	rf
prevalence	FSHD	0.519231				PCA	rf
detection_rate	FSHD	0.384615				PCA	rf
detection_prevalence	FSHD	0.461538				PCA	rf
balanced_accuracy	FSHD	0.79037				PCA	rf
accuracy		0.846154	0.719189	0.931161	7.89286e-07	PCA	ctree2
kappa		0.691852				PCA	ctree2
mcnemar					1	PCA	ctree2
sensitivity	FSHD	0.851852				PCA	ctree2
specificity	FSHD	0.84				PCA	ctree2
pos_pred_value	FSHD	0.851852				PCA	ctree2
neg_pred_value	FSHD	0.84				PCA	ctree2
precision	FSHD	0.851852				PCA	ctree2
recall	FSHD	0.851852				PCA	ctree2
f1	FSHD	0.851852				PCA	ctree2
prevalence	FSHD	0.519231				PCA	ctree2
detection_rate	FSHD	0.442308				PCA	ctree2
detection_prevalence	FSHD	0.519231				PCA	ctree2
balanced_accuracy	FSHD	0.845926				PCA	ctree2
accuracy		0.788462	0.652962	0.889388	5.62175e-05	PCA	rpart
kappa		0.575668				PCA	rpart
mcnemar					1	PCA	rpart
sensitivity	FSHD	0.814815				PCA	rpart
specificity	FSHD	0.76				PCA	rpart
pos_pred_value	FSHD	0.785714				PCA	rpart
neg_pred_value	FSHD	0.791667				PCA	rpart
precision	FSHD	0.785714				PCA	rpart
recall	FSHD	0.814815				PCA	rpart
f1	FSHD	0.8				PCA	rpart
prevalence	FSHD	0.519231				PCA	rpart
detection_rate	FSHD	0.423077				PCA	rpart
detection_prevalence	FSHD	0.538462				PCA	rpart
balanced_accuracy	FSHD	0.787407				PCA	rpart
accuracy		0.865385	0.742121	0.944121	1.46776e-07	PCA	C5.0
kappa		0.72997				PCA	C5.0
mcnemar					1	PCA	C5.0
sensitivity	FSHD	0.888889				PCA	C5.0
specificity	FSHD	0.84				PCA	C5.0
pos_pred_value	FSHD	0.857143				PCA	C5.0
neg_pred_value	FSHD	0.875				PCA	C5.0
precision	FSHD	0.857143				PCA	C5.0
recall	FSHD	0.888889				PCA	C5.0
f1	FSHD	0.872727				PCA	C5.0
prevalence	FSHD	0.519231				PCA	C5.0
detection_rate	FSHD	0.461538				PCA	C5.0
detection_prevalence	FSHD	0.538462				PCA	C5.0
balanced_accuracy	FSHD	0.864444				PCA	C5.0
accuracy		0.826923	0.69672	0.917674	3.69777e-06	PCA	knn
kappa		0.652819				PCA	knn
mcnemar					1	PCA	knn
sensitivity	FSHD	0.851852				PCA	knn
specificity	FSHD	0.8				PCA	knn
pos_pred_value	FSHD	0.821429				PCA	knn
neg_pred_value	FSHD	0.833333				PCA	knn
precision	FSHD	0.821429				PCA	knn
recall	FSHD	0.851852				PCA	knn
f1	FSHD	0.836364				PCA	knn
prevalence	FSHD	0.519231				PCA	knn
detection_rate	FSHD	0.442308				PCA	knn
detection_prevalence	FSHD	0.538462				PCA	knn
balanced_accuracy	FSHD	0.825926				PCA	knn
accuracy		0.788462	0.652962	0.889388	5.62175e-05	PCA	earth
kappa		0.579412				PCA	earth
mcnemar					0.2278	PCA	earth
sensitivity	FSHD	0.703704				PCA	earth
specificity	FSHD	0.88				PCA	earth
pos_pred_value	FSHD	0.863636				PCA	earth
neg_pred_value	FSHD	0.733333				PCA	earth
precision	FSHD	0.863636				PCA	earth
recall	FSHD	0.703704				PCA	earth
f1	FSHD	0.77551				PCA	earth
prevalence	FSHD	0.519231				PCA	earth
detection_rate	FSHD	0.365385				PCA	earth
detection_prevalence	FSHD	0.423077				PCA	earth
balanced_accuracy	FSHD	0.791852				PCA	earth
accuracy		0.884615	0.765592	0.956459	2.34136e-08	SPA	glmnet
kappa		0.77025				SPA	glmnet
mcnemar					0.220671	SPA	glmnet
sensitivity	FSHD	0.814815				SPA	glmnet
specificity	FSHD	0.96				SPA	glmnet
pos_pred_value	FSHD	0.956522				SPA	glmnet
neg_pred_value	FSHD	0.827586				SPA	glmnet
precision	FSHD	0.956522				SPA	glmnet
recall	FSHD	0.814815				SPA	glmnet
f1	FSHD	0.88				SPA	glmnet
prevalence	FSHD	0.519231				SPA	glmnet
detection_rate	FSHD	0.423077				SPA	glmnet
detection_prevalence	FSHD	0.442308				SPA	glmnet
balanced_accuracy	FSHD	0.887407				SPA	glmnet
accuracy		0.903846	0.789703	0.968036	3.13933e-09	SPA	svmLinear
kappa		0.80826				SPA	svmLinear
mcnemar					0.371093	SPA	svmLinear
sensitivity	FSHD	0.851852				SPA	svmLinear
specificity	FSHD	0.96				SPA	svmLinear
pos_pred_value	FSHD	0.958333				SPA	svmLinear
neg_pred_value	FSHD	0.857143				SPA	svmLinear
precision	FSHD	0.958333				SPA	svmLinear
recall	FSHD	0.851852				SPA	svmLinear
f1	FSHD	0.901961				SPA	svmLinear
prevalence	FSHD	0.519231				SPA	svmLinear
detection_rate	FSHD	0.442308				SPA	svmLinear
detection_prevalence	FSHD	0.461538				SPA	svmLinear
balanced_accuracy	FSHD	0.905926				SPA	svmLinear
accuracy		0.846154	0.719189	0.931161	7.89286e-07	SPA	svmRadial
kappa		0.691852				SPA	svmRadial
mcnemar					1	SPA	svmRadial
sensitivity	FSHD	0.851852				SPA	svmRadial
specificity	FSHD	0.84				SPA	svmRadial
pos_pred_value	FSHD	0.851852				SPA	svmRadial
neg_pred_value	FSHD	0.84				SPA	svmRadial
precision	FSHD	0.851852				SPA	svmRadial
recall	FSHD	0.851852				SPA	svmRadial
f1	FSHD	0.851852				SPA	svmRadial
prevalence	FSHD	0.519231				SPA	svmRadial
detection_rate	FSHD	0.442308				SPA	svmRadial
detection_prevalence	FSHD	0.519231				SPA	svmRadial
balanced_accuracy	FSHD	0.845926				SPA	svmRadial
accuracy		0.826923	0.69672	0.917674	3.69777e-06	SPA	svmLinearWeights2
kappa		0.653846				SPA	svmLinearWeights2
mcnemar					1	SPA	svmLinearWeights2
sensitivity	FSHD	0.814815				SPA	svmLinearWeights2
specificity	FSHD	0.84				SPA	svmLinearWeights2
pos_pred_value	FSHD	0.846154				SPA	svmLinearWeights2
neg_pred_value	FSHD	0.807692				SPA	svmLinearWeights2
precision	FSHD	0.846154				SPA	svmLinearWeights2
recall	FSHD	0.814815				SPA	svmLinearWeights2
f1	FSHD	0.830189				SPA	svmLinearWeights2
prevalence	FSHD	0.519231				SPA	svmLinearWeights2
detection_rate	FSHD	0.423077				SPA	svmLinearWeights2
detection_prevalence	FSHD	0.5				SPA	svmLinearWeights2
balanced_accuracy	FSHD	0.827407				SPA	svmLinearWeights2
accuracy		0.807692	0.674659	0.903732	1.52778e-05	SPA	nb
kappa		0.614815				SPA	nb
mcnemar					1	SPA	nb
sensitivity	FSHD	0.814815				SPA	nb
specificity	FSHD	0.8				SPA	nb
pos_pred_value	FSHD	0.814815				SPA	nb
neg_pred_value	FSHD	0.8				SPA	nb
precision	FSHD	0.814815				SPA	nb
recall	FSHD	0.814815				SPA	nb
f1	FSHD	0.814815				SPA	nb
prevalence	FSHD	0.519231				SPA	nb
detection_rate	FSHD	0.423077				SPA	nb
detection_prevalence	FSHD	0.519231				SPA	nb
balanced_accuracy	FSHD	0.807407				SPA	nb
accuracy		0.865385	0.742121	0.944121	1.46776e-07	SPA	rf
kappa		0.72997				SPA	rf
mcnemar					1	SPA	rf
sensitivity	FSHD	0.888889				SPA	rf
specificity	FSHD	0.84				SPA	rf
pos_pred_value	FSHD	0.857143				SPA	rf
neg_pred_value	FSHD	0.875				SPA	rf
precision	FSHD	0.857143				SPA	rf
recall	FSHD	0.888889				SPA	rf
f1	FSHD	0.872727				SPA	rf
prevalence	FSHD	0.519231				SPA	rf
detection_rate	FSHD	0.461538				SPA	rf
detection_prevalence	FSHD	0.538462				SPA	rf
balanced_accuracy	FSHD	0.864444				SPA	rf
accuracy		0.923077	0.814603	0.978643	3.44066e-10	SPA	ctree2
kappa		0.846381				SPA	ctree2
mcnemar					0.617075	SPA	ctree2
sensitivity	FSHD	0.888889				SPA	ctree2
specificity	FSHD	0.96				SPA	ctree2
pos_pred_value	FSHD	0.96				SPA	ctree2
neg_pred_value	FSHD	0.888889				SPA	ctree2
precision	FSHD	0.96				SPA	ctree2
recall	FSHD	0.888889				SPA	ctree2
f1	FSHD	0.923077				SPA	ctree2
prevalence	FSHD	0.519231				SPA	ctree2
detection_rate	FSHD	0.461538				SPA	ctree2
detection_prevalence	FSHD	0.480769				SPA	ctree2
balanced_accuracy	FSHD	0.924444				SPA	ctree2
accuracy		0.923077	0.814603	0.978643	3.44066e-10	SPA	rpart
kappa		0.846381				SPA	rpart
mcnemar					0.617075	SPA	rpart
sensitivity	FSHD	0.888889				SPA	rpart
specificity	FSHD	0.96				SPA	rpart
pos_pred_value	FSHD	0.96				SPA	rpart
neg_pred_value	FSHD	0.888889				SPA	rpart
precision	FSHD	0.96				SPA	rpart
recall	FSHD	0.888889				SPA	rpart
f1	FSHD	0.923077				SPA	rpart
prevalence	FSHD	0.519231				SPA	rpart
detection_rate	FSHD	0.461538				SPA	rpart
detection_prevalence	FSHD	0.480769				SPA	rpart
balanced_accuracy	FSHD	0.924444				SPA	rpart
accuracy		0.903846	0.789703	0.968036	3.13933e-09	SPA	C5.0
kappa		0.807692				SPA	C5.0
mcnemar					1	SPA	C5.0
sensitivity	FSHD	0.888889				SPA	C5.0
specificity	FSHD	0.92				SPA	C5.0
pos_pred_value	FSHD	0.923077				SPA	C5.0
neg_pred_value	FSHD	0.884615				SPA	C5.0
precision	FSHD	0.923077				SPA	C5.0
recall	FSHD	0.888889				SPA	C5.0
f1	FSHD	0.90566				SPA	C5.0
prevalence	FSHD	0.519231				SPA	C5.0
detection_rate	FSHD	0.461538				SPA	C5.0
detection_prevalence	FSHD	0.5				SPA	C5.0
balanced_accuracy	FSHD	0.904444				SPA	C5.0
accuracy		0.846154	0.719189	0.931161	7.89286e-07	SPA	knn
kappa		0.691852				SPA	knn
mcnemar					1	SPA	knn
sensitivity	FSHD	0.851852				SPA	knn
specificity	FSHD	0.84				SPA	knn
pos_pred_value	FSHD	0.851852				SPA	knn
neg_pred_value	FSHD	0.84				SPA	knn
precision	FSHD	0.851852				SPA	knn
recall	FSHD	0.851852				SPA	knn
f1	FSHD	0.851852				SPA	knn
prevalence	FSHD	0.519231				SPA	knn
detection_rate	FSHD	0.442308				SPA	knn
detection_prevalence	FSHD	0.519231				SPA	knn
balanced_accuracy	FSHD	0.845926				SPA	knn
accuracy		0.884615	0.765592	0.956459	2.34136e-08	SPA	earth
kappa		0.769572				SPA	earth
mcnemar					0.683091	SPA	earth
sensitivity	FSHD	0.851852				SPA	earth
specificity	FSHD	0.92				SPA	earth
pos_pred_value	FSHD	0.92				SPA	earth
neg_pred_value	FSHD	0.851852				SPA	earth
precision	FSHD	0.92				SPA	earth
recall	FSHD	0.851852				SPA	earth
f1	FSHD	0.884615				SPA	earth
prevalence	FSHD	0.519231				SPA	earth
detection_rate	FSHD	0.442308				SPA	earth
detection_prevalence	FSHD	0.480769				SPA	earth
balanced_accuracy	FSHD	0.885926				SPA	earth

## Sheet: Suppl.TableS6
term	class	estimate	conf.low	conf.high	p.value	prep	method
accuracy		0.714286	0.629541	0.789226	1	NTH	glmnet
kappa		0.24477				NTH	glmnet
mcnemar					4.93394e-07	NTH	glmnet
sensitivity	FSHDhigh-RU	0.785714				NTH	glmnet
specificity	FSHDhigh-RU	0.705882				NTH	glmnet
pos_pred_value	FSHDhigh-RU	0.23913				NTH	glmnet
neg_pred_value	FSHDhigh-RU	0.965517				NTH	glmnet
precision	FSHDhigh-RU	0.23913				NTH	glmnet
recall	FSHDhigh-RU	0.785714				NTH	glmnet
f1	FSHDhigh-RU	0.366667				NTH	glmnet
prevalence	FSHDhigh-RU	0.105263				NTH	glmnet
detection_rate	FSHDhigh-RU	0.0827068				NTH	glmnet
detection_prevalence	FSHDhigh-RU	0.345865				NTH	glmnet
balanced_accuracy	FSHDhigh-RU	0.745798				NTH	glmnet
accuracy		0.691729	0.605835	0.768861	1	NTH	svmLinear
kappa		0.197734				NTH	svmLinear
mcnemar					5.80602e-07	NTH	svmLinear
sensitivity	FSHDhigh-RU	0.714286				NTH	svmLinear
specificity	FSHDhigh-RU	0.689076				NTH	svmLinear
pos_pred_value	FSHDhigh-RU	0.212766				NTH	svmLinear
neg_pred_value	FSHDhigh-RU	0.953488				NTH	svmLinear
precision	FSHDhigh-RU	0.212766				NTH	svmLinear
recall	FSHDhigh-RU	0.714286				NTH	svmLinear
f1	FSHDhigh-RU	0.327869				NTH	svmLinear
prevalence	FSHDhigh-RU	0.105263				NTH	svmLinear
detection_rate	FSHDhigh-RU	0.075188				NTH	svmLinear
detection_prevalence	FSHDhigh-RU	0.353383				NTH	svmLinear
balanced_accuracy	FSHDhigh-RU	0.701681				NTH	svmLinear
accuracy		0.646617	0.559053	0.727493	1	NTH	svmRadial
kappa		0.158341				NTH	svmRadial
mcnemar					2.97554e-08	NTH	svmRadial
sensitivity	FSHDhigh-RU	0.714286				NTH	svmRadial
specificity	FSHDhigh-RU	0.638655				NTH	svmRadial
pos_pred_value	FSHDhigh-RU	0.188679				NTH	svmRadial
neg_pred_value	FSHDhigh-RU	0.95				NTH	svmRadial
precision	FSHDhigh-RU	0.188679				NTH	svmRadial
recall	FSHDhigh-RU	0.714286				NTH	svmRadial
f1	FSHDhigh-RU	0.298507				NTH	svmRadial
prevalence	FSHDhigh-RU	0.105263				NTH	svmRadial
detection_rate	FSHDhigh-RU	0.075188				NTH	svmRadial
detection_prevalence	FSHDhigh-RU	0.398496				NTH	svmRadial
balanced_accuracy	FSHDhigh-RU	0.676471				NTH	svmRadial
accuracy		0.75188	0.669563	0.822641	0.999999	NTH	svmLinearWeights2
kappa		0.311745				NTH	svmLinearWeights2
mcnemar					1.09264e-06	NTH	svmLinearWeights2
sensitivity	FSHDhigh-RU	0.857143				NTH	svmLinearWeights2
specificity	FSHDhigh-RU	0.739496				NTH	svmLinearWeights2
pos_pred_value	FSHDhigh-RU	0.27907				NTH	svmLinearWeights2
neg_pred_value	FSHDhigh-RU	0.977778				NTH	svmLinearWeights2
precision	FSHDhigh-RU	0.27907				NTH	svmLinearWeights2
recall	FSHDhigh-RU	0.857143				NTH	svmLinearWeights2
f1	FSHDhigh-RU	0.421053				NTH	svmLinearWeights2
prevalence	FSHDhigh-RU	0.105263				NTH	svmLinearWeights2
detection_rate	FSHDhigh-RU	0.0902256				NTH	svmLinearWeights2
detection_prevalence	FSHDhigh-RU	0.323308				NTH	svmLinearWeights2
balanced_accuracy	FSHDhigh-RU	0.798319				NTH	svmLinearWeights2
accuracy		0.646617	0.559053	0.727493	1	NTH	nb
kappa		0.0803296				NTH	nb
mcnemar					3.0462e-06	NTH	nb
sensitivity	FSHDhigh-RU	0.5				NTH	nb
specificity	FSHDhigh-RU	0.663866				NTH	nb
pos_pred_value	FSHDhigh-RU	0.148936				NTH	nb
neg_pred_value	FSHDhigh-RU	0.918605				NTH	nb
precision	FSHDhigh-RU	0.148936				NTH	nb
recall	FSHDhigh-RU	0.5				NTH	nb
f1	FSHDhigh-RU	0.229508				NTH	nb
prevalence	FSHDhigh-RU	0.105263				NTH	nb
detection_rate	FSHDhigh-RU	0.0526316				NTH	nb
detection_prevalence	FSHDhigh-RU	0.353383				NTH	nb
balanced_accuracy	FSHDhigh-RU	0.581933				NTH	nb
accuracy		0.691729	0.605835	0.768861	1	NTH	rf
kappa		0.197734				NTH	rf
mcnemar					5.80602e-07	NTH	rf
sensitivity	FSHDhigh-RU	0.714286				NTH	rf
specificity	FSHDhigh-RU	0.689076				NTH	rf
pos_pred_value	FSHDhigh-RU	0.212766				NTH	rf
neg_pred_value	FSHDhigh-RU	0.953488				NTH	rf
precision	FSHDhigh-RU	0.212766				NTH	rf
recall	FSHDhigh-RU	0.714286				NTH	rf
f1	FSHDhigh-RU	0.327869				NTH	rf
prevalence	FSHDhigh-RU	0.105263				NTH	rf
detection_rate	FSHDhigh-RU	0.075188				NTH	rf
detection_prevalence	FSHDhigh-RU	0.353383				NTH	rf
balanced_accuracy	FSHDhigh-RU	0.701681				NTH	rf
accuracy		0.879699	0.812	0.92965	0.765851	NTH	ctree2
kappa		-0.027027				NTH	ctree2
mcnemar					0.00595953	NTH	ctree2
sensitivity	FSHDhigh-RU	0				NTH	ctree2
specificity	FSHDhigh-RU	0.983193				NTH	ctree2
pos_pred_value	FSHDhigh-RU	0				NTH	ctree2
neg_pred_value	FSHDhigh-RU	0.89313				NTH	ctree2
precision	FSHDhigh-RU	0				NTH	ctree2
recall	FSHDhigh-RU	0				NTH	ctree2
f1	FSHDhigh-RU	#NUM!				NTH	ctree2
prevalence	FSHDhigh-RU	0.105263				NTH	ctree2
detection_rate	FSHDhigh-RU	0				NTH	ctree2
detection_prevalence	FSHDhigh-RU	0.0150376				NTH	ctree2
balanced_accuracy	FSHDhigh-RU	0.491597				NTH	ctree2
accuracy		0.669173	0.582343	0.748279	1	NTH	rpart
kappa		0.15213				NTH	rpart
mcnemar					6.52688e-07	NTH	rpart
sensitivity	FSHDhigh-RU	0.642857				NTH	rpart
specificity	FSHDhigh-RU	0.672269				NTH	rpart
pos_pred_value	FSHDhigh-RU	0.1875				NTH	rpart
neg_pred_value	FSHDhigh-RU	0.941176				NTH	rpart
precision	FSHDhigh-RU	0.1875				NTH	rpart
recall	FSHDhigh-RU	0.642857				NTH	rpart
f1	FSHDhigh-RU	0.290323				NTH	rpart
prevalence	FSHDhigh-RU	0.105263				NTH	rpart
detection_rate	FSHDhigh-RU	0.0676692				NTH	rpart
detection_prevalence	FSHDhigh-RU	0.360902				NTH	rpart
balanced_accuracy	FSHDhigh-RU	0.657563				NTH	rpart
accuracy		0.75188	0.669563	0.822641	0.999999	NTH	C5.0
kappa		0.236297				NTH	C5.0
mcnemar					0.000128295	NTH	C5.0
sensitivity	FSHDhigh-RU	0.642857				NTH	C5.0
specificity	FSHDhigh-RU	0.764706				NTH	C5.0
pos_pred_value	FSHDhigh-RU	0.243243				NTH	C5.0
neg_pred_value	FSHDhigh-RU	0.947917				NTH	C5.0
precision	FSHDhigh-RU	0.243243				NTH	C5.0
recall	FSHDhigh-RU	0.642857				NTH	C5.0
f1	FSHDhigh-RU	0.352941				NTH	C5.0
prevalence	FSHDhigh-RU	0.105263				NTH	C5.0
detection_rate	FSHDhigh-RU	0.0676692				NTH	C5.0
detection_prevalence	FSHDhigh-RU	0.278195				NTH	C5.0
balanced_accuracy	FSHDhigh-RU	0.703782				NTH	C5.0
accuracy		0.56391	0.475254	0.649656	1	NTH	knn
kappa		0.0785953				NTH	knn
mcnemar					6.76869e-10	NTH	knn
sensitivity	FSHDhigh-RU	0.642857				NTH	knn
specificity	FSHDhigh-RU	0.554622				NTH	knn
pos_pred_value	FSHDhigh-RU	0.145161				NTH	knn
neg_pred_value	FSHDhigh-RU	0.929577				NTH	knn
precision	FSHDhigh-RU	0.145161				NTH	knn
recall	FSHDhigh-RU	0.642857				NTH	knn
f1	FSHDhigh-RU	0.236842				NTH	knn
prevalence	FSHDhigh-RU	0.105263				NTH	knn
detection_rate	FSHDhigh-RU	0.0676692				NTH	knn
detection_prevalence	FSHDhigh-RU	0.466165				NTH	knn
balanced_accuracy	FSHDhigh-RU	0.598739				NTH	knn
accuracy		0.781955	0.702094	0.848846	0.999955	NTH	earth
kappa		0.352526				NTH	earth
mcnemar					8.32356e-06	NTH	earth
sensitivity	FSHDhigh-RU	0.857143				NTH	earth
specificity	FSHDhigh-RU	0.773109				NTH	earth
pos_pred_value	FSHDhigh-RU	0.307692				NTH	earth
neg_pred_value	FSHDhigh-RU	0.978723				NTH	earth
precision	FSHDhigh-RU	0.307692				NTH	earth
recall	FSHDhigh-RU	0.857143				NTH	earth
f1	FSHDhigh-RU	0.45283				NTH	earth
prevalence	FSHDhigh-RU	0.105263				NTH	earth
detection_rate	FSHDhigh-RU	0.0902256				NTH	earth
detection_prevalence	FSHDhigh-RU	0.293233				NTH	earth
balanced_accuracy	FSHDhigh-RU	0.815126				NTH	earth
accuracy		0.75188	0.669563	0.822641	0.999999	BOX	glmnet
kappa		0.207332				BOX	glmnet
mcnemar					0.000498515	BOX	glmnet
sensitivity	FSHDhigh-RU	0.571429				BOX	glmnet
specificity	FSHDhigh-RU	0.773109				BOX	glmnet
pos_pred_value	FSHDhigh-RU	0.228571				BOX	glmnet
neg_pred_value	FSHDhigh-RU	0.938776				BOX	glmnet
precision	FSHDhigh-RU	0.228571				BOX	glmnet
recall	FSHDhigh-RU	0.571429				BOX	glmnet
f1	FSHDhigh-RU	0.326531				BOX	glmnet
prevalence	FSHDhigh-RU	0.105263				BOX	glmnet
detection_rate	FSHDhigh-RU	0.0601504				BOX	glmnet
detection_prevalence	FSHDhigh-RU	0.263158				BOX	glmnet
balanced_accuracy	FSHDhigh-RU	0.672269				BOX	glmnet
accuracy		0.669173	0.582343	0.748279	1	BOX	svmLinear
kappa		0.200765				BOX	svmLinear
mcnemar					2.43356e-08	BOX	svmLinear
sensitivity	FSHDhigh-RU	0.785714				BOX	svmLinear
specificity	FSHDhigh-RU	0.655462				BOX	svmLinear
pos_pred_value	FSHDhigh-RU	0.211538				BOX	svmLinear
neg_pred_value	FSHDhigh-RU	0.962963				BOX	svmLinear
precision	FSHDhigh-RU	0.211538				BOX	svmLinear
recall	FSHDhigh-RU	0.785714				BOX	svmLinear
f1	FSHDhigh-RU	0.333333				BOX	svmLinear
prevalence	FSHDhigh-RU	0.105263				BOX	svmLinear
detection_rate	FSHDhigh-RU	0.0827068				BOX	svmLinear
detection_prevalence	FSHDhigh-RU	0.390977				BOX	svmLinear
balanced_accuracy	FSHDhigh-RU	0.720588				BOX	svmLinear
accuracy		0.676692	0.590151	0.755163	1	BOX	svmRadial
kappa		0.158599				BOX	svmRadial
mcnemar					1.0611e-06	BOX	svmRadial
sensitivity	FSHDhigh-RU	0.642857				BOX	svmRadial
specificity	FSHDhigh-RU	0.680672				BOX	svmRadial
pos_pred_value	FSHDhigh-RU	0.191489				BOX	svmRadial
neg_pred_value	FSHDhigh-RU	0.94186				BOX	svmRadial
precision	FSHDhigh-RU	0.191489				BOX	svmRadial
recall	FSHDhigh-RU	0.642857				BOX	svmRadial
f1	FSHDhigh-RU	0.295082				BOX	svmRadial
prevalence	FSHDhigh-RU	0.105263				BOX	svmRadial
detection_rate	FSHDhigh-RU	0.0676692				BOX	svmRadial
detection_prevalence	FSHDhigh-RU	0.353383				BOX	svmRadial
balanced_accuracy	FSHDhigh-RU	0.661765				BOX	svmRadial
accuracy		0.759398	0.67765	0.829239	0.999998	BOX	svmLinearWeights2
kappa		0.297921				BOX	svmLinearWeights2
mcnemar					9.89673e-06	BOX	svmLinearWeights2
sensitivity	FSHDhigh-RU	0.785714				BOX	svmLinearWeights2
specificity	FSHDhigh-RU	0.756303				BOX	svmLinearWeights2
pos_pred_value	FSHDhigh-RU	0.275				BOX	svmLinearWeights2
neg_pred_value	FSHDhigh-RU	0.967742				BOX	svmLinearWeights2
precision	FSHDhigh-RU	0.275				BOX	svmLinearWeights2
recall	FSHDhigh-RU	0.785714				BOX	svmLinearWeights2
f1	FSHDhigh-RU	0.407407				BOX	svmLinearWeights2
prevalence	FSHDhigh-RU	0.105263				BOX	svmLinearWeights2
detection_rate	FSHDhigh-RU	0.0827068				BOX	svmLinearWeights2
detection_prevalence	FSHDhigh-RU	0.300752				BOX	svmLinearWeights2
balanced_accuracy	FSHDhigh-RU	0.771008				BOX	svmLinearWeights2
accuracy		0.661654	0.574558	0.741373	1	BOX	nb
kappa		0.119464				BOX	nb
mcnemar					1.83972e-06	BOX	nb
sensitivity	FSHDhigh-RU	0.571429				BOX	nb
specificity	FSHDhigh-RU	0.672269				BOX	nb
pos_pred_value	FSHDhigh-RU	0.170213				BOX	nb
neg_pred_value	FSHDhigh-RU	0.930233				BOX	nb
precision	FSHDhigh-RU	0.170213				BOX	nb
recall	FSHDhigh-RU	0.571429				BOX	nb
f1	FSHDhigh-RU	0.262295				BOX	nb
prevalence	FSHDhigh-RU	0.105263				BOX	nb
detection_rate	FSHDhigh-RU	0.0601504				BOX	nb
detection_prevalence	FSHDhigh-RU	0.353383				BOX	nb
balanced_accuracy	FSHDhigh-RU	0.621849				BOX	nb
accuracy		0.706767	0.621614	0.782462	1	BOX	rf
kappa		0.15891				BOX	rf
mcnemar					3.13637e-05	BOX	rf
sensitivity	FSHDhigh-RU	0.571429				BOX	rf
specificity	FSHDhigh-RU	0.722689				BOX	rf
pos_pred_value	FSHDhigh-RU	0.195122				BOX	rf
neg_pred_value	FSHDhigh-RU	0.934783				BOX	rf
precision	FSHDhigh-RU	0.195122				BOX	rf
recall	FSHDhigh-RU	0.571429				BOX	rf
f1	FSHDhigh-RU	0.290909				BOX	rf
prevalence	FSHDhigh-RU	0.105263				BOX	rf
detection_rate	FSHDhigh-RU	0.0601504				BOX	rf
detection_prevalence	FSHDhigh-RU	0.308271				BOX	rf
balanced_accuracy	FSHDhigh-RU	0.647059				BOX	rf
accuracy		0.87218	0.803252	0.923745	0.839316	BOX	ctree2
kappa		-0.0385852				BOX	ctree2
mcnemar					0.0152934	BOX	ctree2
sensitivity	FSHDhigh-RU	0				BOX	ctree2
specificity	FSHDhigh-RU	0.97479				BOX	ctree2
pos_pred_value	FSHDhigh-RU	0				BOX	ctree2
neg_pred_value	FSHDhigh-RU	0.892308				BOX	ctree2
precision	FSHDhigh-RU	0				BOX	ctree2
recall	FSHDhigh-RU	0				BOX	ctree2
f1	FSHDhigh-RU	#NUM!				BOX	ctree2
prevalence	FSHDhigh-RU	0.105263				BOX	ctree2
detection_rate	FSHDhigh-RU	0				BOX	ctree2
detection_prevalence	FSHDhigh-RU	0.0225564				BOX	ctree2
balanced_accuracy	FSHDhigh-RU	0.487395				BOX	ctree2
accuracy		0.736842	0.653473	0.809358	1	BOX	rpart
kappa		0.218566				BOX	rpart
mcnemar					4.97623e-05	BOX	rpart
sensitivity	FSHDhigh-RU	0.642857				BOX	rpart
specificity	FSHDhigh-RU	0.747899				BOX	rpart
pos_pred_value	FSHDhigh-RU	0.230769				BOX	rpart
neg_pred_value	FSHDhigh-RU	0.946809				BOX	rpart
precision	FSHDhigh-RU	0.230769				BOX	rpart
recall	FSHDhigh-RU	0.642857				BOX	rpart
f1	FSHDhigh-RU	0.339623				BOX	rpart
prevalence	FSHDhigh-RU	0.105263				BOX	rpart
detection_rate	FSHDhigh-RU	0.0676692				BOX	rpart
detection_prevalence	FSHDhigh-RU	0.293233				BOX	rpart
balanced_accuracy	FSHDhigh-RU	0.695378				BOX	rpart
accuracy		0.721805	0.637492	0.795963	1	BOX	C5.0
kappa		0.202043				BOX	C5.0
mcnemar					1.91675e-05	BOX	C5.0
sensitivity	FSHDhigh-RU	0.642857				BOX	C5.0
specificity	FSHDhigh-RU	0.731092				BOX	C5.0
pos_pred_value	FSHDhigh-RU	0.219512				BOX	C5.0
neg_pred_value	FSHDhigh-RU	0.945652				BOX	C5.0
precision	FSHDhigh-RU	0.219512				BOX	C5.0
recall	FSHDhigh-RU	0.642857				BOX	C5.0
f1	FSHDhigh-RU	0.327273				BOX	C5.0
prevalence	FSHDhigh-RU	0.105263				BOX	C5.0
detection_rate	FSHDhigh-RU	0.0676692				BOX	C5.0
detection_prevalence	FSHDhigh-RU	0.308271				BOX	C5.0
balanced_accuracy	FSHDhigh-RU	0.686975				BOX	C5.0
accuracy		0.766917	0.685767	0.835807	0.999994	BOX	knn
kappa		0.331442				BOX	knn
mcnemar					3.01584e-06	BOX	knn
sensitivity	FSHDhigh-RU	0.857143				BOX	knn
specificity	FSHDhigh-RU	0.756303				BOX	knn
pos_pred_value	FSHDhigh-RU	0.292683				BOX	knn
neg_pred_value	FSHDhigh-RU	0.978261				BOX	knn
precision	FSHDhigh-RU	0.292683				BOX	knn
recall	FSHDhigh-RU	0.857143				BOX	knn
f1	FSHDhigh-RU	0.436364				BOX	knn
prevalence	FSHDhigh-RU	0.105263				BOX	knn
detection_rate	FSHDhigh-RU	0.0902256				BOX	knn
detection_prevalence	FSHDhigh-RU	0.308271				BOX	knn
balanced_accuracy	FSHDhigh-RU	0.806723				BOX	knn
accuracy		0.699248	0.613713	0.775674	1	BOX	earth
kappa		0.122402				BOX	earth
mcnemar					7.72268e-05	BOX	earth
sensitivity	FSHDhigh-RU	0.5				BOX	earth
specificity	FSHDhigh-RU	0.722689				BOX	earth
pos_pred_value	FSHDhigh-RU	0.175				BOX	earth
neg_pred_value	FSHDhigh-RU	0.924731				BOX	earth
precision	FSHDhigh-RU	0.175				BOX	earth
recall	FSHDhigh-RU	0.5				BOX	earth
f1	FSHDhigh-RU	0.259259				BOX	earth
prevalence	FSHDhigh-RU	0.105263				BOX	earth
detection_rate	FSHDhigh-RU	0.0526316				BOX	earth
detection_prevalence	FSHDhigh-RU	0.300752				BOX	earth
balanced_accuracy	FSHDhigh-RU	0.611345				BOX	earth
accuracy		0.766917	0.685767	0.835807	0.999994	YEO	glmnet
kappa		0.307873				YEO	glmnet
mcnemar					1.62866e-05	YEO	glmnet
sensitivity	FSHDhigh-RU	0.785714				YEO	glmnet
specificity	FSHDhigh-RU	0.764706				YEO	glmnet
pos_pred_value	FSHDhigh-RU	0.282051				YEO	glmnet
neg_pred_value	FSHDhigh-RU	0.968085				YEO	glmnet
precision	FSHDhigh-RU	0.282051				YEO	glmnet
recall	FSHDhigh-RU	0.785714				YEO	glmnet
f1	FSHDhigh-RU	0.415094				YEO	glmnet
prevalence	FSHDhigh-RU	0.105263				YEO	glmnet
detection_rate	FSHDhigh-RU	0.0827068				YEO	glmnet
detection_prevalence	FSHDhigh-RU	0.293233				YEO	glmnet
balanced_accuracy	FSHDhigh-RU	0.77521				YEO	glmnet
accuracy		0.736842	0.653473	0.809358	1	YEO	svmLinear
kappa		0.218566				YEO	svmLinear
mcnemar					4.97623e-05	YEO	svmLinear
sensitivity	FSHDhigh-RU	0.642857				YEO	svmLinear
specificity	FSHDhigh-RU	0.747899				YEO	svmLinear
pos_pred_value	FSHDhigh-RU	0.230769				YEO	svmLinear
neg_pred_value	FSHDhigh-RU	0.946809				YEO	svmLinear
precision	FSHDhigh-RU	0.230769				YEO	svmLinear
recall	FSHDhigh-RU	0.642857				YEO	svmLinear
f1	FSHDhigh-RU	0.339623				YEO	svmLinear
prevalence	FSHDhigh-RU	0.105263				YEO	svmLinear
detection_rate	FSHDhigh-RU	0.0676692				YEO	svmLinear
detection_prevalence	FSHDhigh-RU	0.293233				YEO	svmLinear
balanced_accuracy	FSHDhigh-RU	0.695378				YEO	svmLinear
accuracy		0.609023	0.52066	0.692417	1	YEO	svmRadial
kappa		0.130282				YEO	svmRadial
mcnemar					2.47607e-09	YEO	svmRadial
sensitivity	FSHDhigh-RU	0.714286				YEO	svmRadial
specificity	FSHDhigh-RU	0.596639				YEO	svmRadial
pos_pred_value	FSHDhigh-RU	0.172414				YEO	svmRadial
neg_pred_value	FSHDhigh-RU	0.946667				YEO	svmRadial
precision	FSHDhigh-RU	0.172414				YEO	svmRadial
recall	FSHDhigh-RU	0.714286				YEO	svmRadial
f1	FSHDhigh-RU	0.277778				YEO	svmRadial
prevalence	FSHDhigh-RU	0.105263				YEO	svmRadial
detection_rate	FSHDhigh-RU	0.075188				YEO	svmRadial
detection_prevalence	FSHDhigh-RU	0.43609				YEO	svmRadial
balanced_accuracy	FSHDhigh-RU	0.655462				YEO	svmRadial
accuracy		0.714286	0.629541	0.789226	1	YEO	svmLinearWeights2
kappa		0.194196				YEO	svmLinearWeights2
mcnemar					1.18691e-05	YEO	svmLinearWeights2
sensitivity	FSHDhigh-RU	0.642857				YEO	svmLinearWeights2
specificity	FSHDhigh-RU	0.722689				YEO	svmLinearWeights2
pos_pred_value	FSHDhigh-RU	0.214286				YEO	svmLinearWeights2
neg_pred_value	FSHDhigh-RU	0.945055				YEO	svmLinearWeights2
precision	FSHDhigh-RU	0.214286				YEO	svmLinearWeights2
recall	FSHDhigh-RU	0.642857				YEO	svmLinearWeights2
f1	FSHDhigh-RU	0.321429				YEO	svmLinearWeights2
prevalence	FSHDhigh-RU	0.105263				YEO	svmLinearWeights2
detection_rate	FSHDhigh-RU	0.0676692				YEO	svmLinearWeights2
detection_prevalence	FSHDhigh-RU	0.315789				YEO	svmLinearWeights2
balanced_accuracy	FSHDhigh-RU	0.682773				YEO	svmLinearWeights2
accuracy		0.646617	0.559053	0.727493	1	YEO	nb
kappa		0.0803296				YEO	nb
mcnemar					3.0462e-06	YEO	nb
sensitivity	FSHDhigh-RU	0.5				YEO	nb
specificity	FSHDhigh-RU	0.663866				YEO	nb
pos_pred_value	FSHDhigh-RU	0.148936				YEO	nb
neg_pred_value	FSHDhigh-RU	0.918605				YEO	nb
precision	FSHDhigh-RU	0.148936				YEO	nb
recall	FSHDhigh-RU	0.5				YEO	nb
f1	FSHDhigh-RU	0.229508				YEO	nb
prevalence	FSHDhigh-RU	0.105263				YEO	nb
detection_rate	FSHDhigh-RU	0.0526316				YEO	nb
detection_prevalence	FSHDhigh-RU	0.353383				YEO	nb
balanced_accuracy	FSHDhigh-RU	0.581933				YEO	nb
accuracy		0.691729	0.605835	0.768861	1	YEO	rf
kappa		0.221778				YEO	rf
mcnemar					1.09681e-07	YEO	rf
sensitivity	FSHDhigh-RU	0.785714				YEO	rf
specificity	FSHDhigh-RU	0.680672				YEO	rf
pos_pred_value	FSHDhigh-RU	0.22449				YEO	rf
neg_pred_value	FSHDhigh-RU	0.964286				YEO	rf
precision	FSHDhigh-RU	0.22449				YEO	rf
recall	FSHDhigh-RU	0.785714				YEO	rf
f1	FSHDhigh-RU	0.349206				YEO	rf
prevalence	FSHDhigh-RU	0.105263				YEO	rf
detection_rate	FSHDhigh-RU	0.0827068				YEO	rf
detection_prevalence	FSHDhigh-RU	0.368421				YEO	rf
balanced_accuracy	FSHDhigh-RU	0.733193				YEO	rf
accuracy		0.887218	0.820812	0.935485	0.675119	YEO	ctree2
kappa		-0.0142349				YEO	ctree2
mcnemar					0.00194577	YEO	ctree2
sensitivity	FSHDhigh-RU	0				YEO	ctree2
specificity	FSHDhigh-RU	0.991597				YEO	ctree2
pos_pred_value	FSHDhigh-RU	0				YEO	ctree2
neg_pred_value	FSHDhigh-RU	0.893939				YEO	ctree2
precision	FSHDhigh-RU	0				YEO	ctree2
recall	FSHDhigh-RU	0				YEO	ctree2
f1	FSHDhigh-RU	#NUM!				YEO	ctree2
prevalence	FSHDhigh-RU	0.105263				YEO	ctree2
detection_rate	FSHDhigh-RU	0				YEO	ctree2
detection_prevalence	FSHDhigh-RU	0.0075188				YEO	ctree2
balanced_accuracy	FSHDhigh-RU	0.495798				YEO	ctree2
accuracy		0.721805	0.637492	0.795963	1	YEO	rpart
kappa		0.228321				YEO	rpart
mcnemar					4.16105e-06	YEO	rpart
sensitivity	FSHDhigh-RU	0.714286				YEO	rpart
specificity	FSHDhigh-RU	0.722689				YEO	rpart
pos_pred_value	FSHDhigh-RU	0.232558				YEO	rpart
neg_pred_value	FSHDhigh-RU	0.955556				YEO	rpart
precision	FSHDhigh-RU	0.232558				YEO	rpart
recall	FSHDhigh-RU	0.714286				YEO	rpart
f1	FSHDhigh-RU	0.350877				YEO	rpart
prevalence	FSHDhigh-RU	0.105263				YEO	rpart
detection_rate	FSHDhigh-RU	0.075188				YEO	rpart
detection_prevalence	FSHDhigh-RU	0.323308				YEO	rpart
balanced_accuracy	FSHDhigh-RU	0.718487				YEO	rpart
accuracy		0.714286	0.629541	0.789226	1	YEO	C5.0
kappa		0.194196				YEO	C5.0
mcnemar					1.18691e-05	YEO	C5.0
sensitivity	FSHDhigh-RU	0.642857				YEO	C5.0
specificity	FSHDhigh-RU	0.722689				YEO	C5.0
pos_pred_value	FSHDhigh-RU	0.214286				YEO	C5.0
neg_pred_value	FSHDhigh-RU	0.945055				YEO	C5.0
precision	FSHDhigh-RU	0.214286				YEO	C5.0
recall	FSHDhigh-RU	0.642857				YEO	C5.0
f1	FSHDhigh-RU	0.321429				YEO	C5.0
prevalence	FSHDhigh-RU	0.105263				YEO	C5.0
detection_rate	FSHDhigh-RU	0.0676692				YEO	C5.0
detection_prevalence	FSHDhigh-RU	0.315789				YEO	C5.0
balanced_accuracy	FSHDhigh-RU	0.682773				YEO	C5.0
accuracy		0.654135	0.566794	0.734444	1	YEO	knn
kappa		0.139764				YEO	knn
mcnemar					2.46333e-07	YEO	knn
sensitivity	FSHDhigh-RU	0.642857				YEO	knn
specificity	FSHDhigh-RU	0.655462				YEO	knn
pos_pred_value	FSHDhigh-RU	0.18				YEO	knn
neg_pred_value	FSHDhigh-RU	0.939759				YEO	knn
precision	FSHDhigh-RU	0.18				YEO	knn
recall	FSHDhigh-RU	0.642857				YEO	knn
f1	FSHDhigh-RU	0.28125				YEO	knn
prevalence	FSHDhigh-RU	0.105263				YEO	knn
detection_rate	FSHDhigh-RU	0.0676692				YEO	knn
detection_prevalence	FSHDhigh-RU	0.37594				YEO	knn
balanced_accuracy	FSHDhigh-RU	0.64916				YEO	knn
accuracy		0.706767	0.621614	0.782462	1	YEO	earth
kappa		0.15891				YEO	earth
mcnemar					3.13637e-05	YEO	earth
sensitivity	FSHDhigh-RU	0.571429				YEO	earth
specificity	FSHDhigh-RU	0.722689				YEO	earth
pos_pred_value	FSHDhigh-RU	0.195122				YEO	earth
neg_pred_value	FSHDhigh-RU	0.934783				YEO	earth
precision	FSHDhigh-RU	0.195122				YEO	earth
recall	FSHDhigh-RU	0.571429				YEO	earth
f1	FSHDhigh-RU	0.290909				YEO	earth
prevalence	FSHDhigh-RU	0.105263				YEO	earth
detection_rate	FSHDhigh-RU	0.0601504				YEO	earth
detection_prevalence	FSHDhigh-RU	0.308271				YEO	earth
balanced_accuracy	FSHDhigh-RU	0.647059				YEO	earth
accuracy		0.789474	0.710306	0.855315	0.999886	PWR	glmnet
kappa		0.314433				PWR	glmnet
mcnemar					0.000329839	PWR	glmnet
sensitivity	FSHDhigh-RU	0.714286				PWR	glmnet
specificity	FSHDhigh-RU	0.798319				PWR	glmnet
pos_pred_value	FSHDhigh-RU	0.294118				PWR	glmnet
neg_pred_value	FSHDhigh-RU	0.959596				PWR	glmnet
precision	FSHDhigh-RU	0.294118				PWR	glmnet
recall	FSHDhigh-RU	0.714286				PWR	glmnet
f1	FSHDhigh-RU	0.416667				PWR	glmnet
prevalence	FSHDhigh-RU	0.105263				PWR	glmnet
detection_rate	FSHDhigh-RU	0.075188				PWR	glmnet
detection_prevalence	FSHDhigh-RU	0.255639				PWR	glmnet
balanced_accuracy	FSHDhigh-RU	0.756303				PWR	glmnet
accuracy		0.661654	0.574558	0.741373	1	PWR	svmLinear
kappa		0.170708				PWR	svmLinear
mcnemar					8.02511e-08	PWR	svmLinear
sensitivity	FSHDhigh-RU	0.714286				PWR	svmLinear
specificity	FSHDhigh-RU	0.655462				PWR	svmLinear
pos_pred_value	FSHDhigh-RU	0.196078				PWR	svmLinear
neg_pred_value	FSHDhigh-RU	0.95122				PWR	svmLinear
precision	FSHDhigh-RU	0.196078				PWR	svmLinear
recall	FSHDhigh-RU	0.714286				PWR	svmLinear
f1	FSHDhigh-RU	0.307692				PWR	svmLinear
prevalence	FSHDhigh-RU	0.105263				PWR	svmLinear
detection_rate	FSHDhigh-RU	0.075188				PWR	svmLinear
detection_prevalence	FSHDhigh-RU	0.383459				PWR	svmLinear
balanced_accuracy	FSHDhigh-RU	0.684874				PWR	svmLinear
accuracy		0.631579	0.543633	0.713526	1	PWR	svmRadial
kappa		0.122526				PWR	svmRadial
mcnemar					5.68069e-08	PWR	svmRadial
sensitivity	FSHDhigh-RU	0.642857				PWR	svmRadial
specificity	FSHDhigh-RU	0.630252				PWR	svmRadial
pos_pred_value	FSHDhigh-RU	0.169811				PWR	svmRadial
neg_pred_value	FSHDhigh-RU	0.9375				PWR	svmRadial
precision	FSHDhigh-RU	0.169811				PWR	svmRadial
recall	FSHDhigh-RU	0.642857				PWR	svmRadial
f1	FSHDhigh-RU	0.268657				PWR	svmRadial
prevalence	FSHDhigh-RU	0.105263				PWR	svmRadial
detection_rate	FSHDhigh-RU	0.0676692				PWR	svmRadial
detection_prevalence	FSHDhigh-RU	0.398496				PWR	svmRadial
balanced_accuracy	FSHDhigh-RU	0.636555				PWR	svmRadial
accuracy		0.729323	0.645469	0.802674	1	PWR	svmLinearWeights2
kappa		0.236607				PWR	svmLinearWeights2
mcnemar					6.79535e-06	PWR	svmLinearWeights2
sensitivity	FSHDhigh-RU	0.714286				PWR	svmLinearWeights2
specificity	FSHDhigh-RU	0.731092				PWR	svmLinearWeights2
pos_pred_value	FSHDhigh-RU	0.238095				PWR	svmLinearWeights2
neg_pred_value	FSHDhigh-RU	0.956044				PWR	svmLinearWeights2
precision	FSHDhigh-RU	0.238095				PWR	svmLinearWeights2
recall	FSHDhigh-RU	0.714286				PWR	svmLinearWeights2
f1	FSHDhigh-RU	0.357143				PWR	svmLinearWeights2
prevalence	FSHDhigh-RU	0.105263				PWR	svmLinearWeights2
detection_rate	FSHDhigh-RU	0.075188				PWR	svmLinearWeights2
detection_prevalence	FSHDhigh-RU	0.315789				PWR	svmLinearWeights2
balanced_accuracy	FSHDhigh-RU	0.722689				PWR	svmLinearWeights2
accuracy		0.646617	0.559053	0.727493	1	PWR	nb
kappa		0.133851				PWR	nb
mcnemar					1.51161e-07	PWR	nb
sensitivity	FSHDhigh-RU	0.642857				PWR	nb
specificity	FSHDhigh-RU	0.647059				PWR	nb
pos_pred_value	FSHDhigh-RU	0.176471				PWR	nb
neg_pred_value	FSHDhigh-RU	0.939024				PWR	nb
precision	FSHDhigh-RU	0.176471				PWR	nb
recall	FSHDhigh-RU	0.642857				PWR	nb
f1	FSHDhigh-RU	0.276923				PWR	nb
prevalence	FSHDhigh-RU	0.105263				PWR	nb
detection_rate	FSHDhigh-RU	0.0676692				PWR	nb
detection_prevalence	FSHDhigh-RU	0.383459				PWR	nb
balanced_accuracy	FSHDhigh-RU	0.644958				PWR	nb
accuracy		0.669173	0.582343	0.748279	1	PWR	rf
kappa		0.177165				PWR	rf
mcnemar					1.31711e-07	PWR	rf
sensitivity	FSHDhigh-RU	0.714286				PWR	rf
specificity	FSHDhigh-RU	0.663866				PWR	rf
pos_pred_value	FSHDhigh-RU	0.2				PWR	rf
neg_pred_value	FSHDhigh-RU	0.951807				PWR	rf
precision	FSHDhigh-RU	0.2				PWR	rf
recall	FSHDhigh-RU	0.714286				PWR	rf
f1	FSHDhigh-RU	0.3125				PWR	rf
prevalence	FSHDhigh-RU	0.105263				PWR	rf
detection_rate	FSHDhigh-RU	0.075188				PWR	rf
detection_prevalence	FSHDhigh-RU	0.37594				PWR	rf
balanced_accuracy	FSHDhigh-RU	0.689076				PWR	rf
accuracy		0.87218	0.803252	0.923745	0.839316	PWR	ctree2
kappa		-0.0385852				PWR	ctree2
mcnemar					0.0152934	PWR	ctree2
sensitivity	FSHDhigh-RU	0				PWR	ctree2
specificity	FSHDhigh-RU	0.97479				PWR	ctree2
pos_pred_value	FSHDhigh-RU	0				PWR	ctree2
neg_pred_value	FSHDhigh-RU	0.892308				PWR	ctree2
precision	FSHDhigh-RU	0				PWR	ctree2
recall	FSHDhigh-RU	0				PWR	ctree2
f1	FSHDhigh-RU	#NUM!				PWR	ctree2
prevalence	FSHDhigh-RU	0.105263				PWR	ctree2
detection_rate	FSHDhigh-RU	0				PWR	ctree2
detection_prevalence	FSHDhigh-RU	0.0225564				PWR	ctree2
balanced_accuracy	FSHDhigh-RU	0.487395				PWR	ctree2
accuracy		0.744361	0.661504	0.816014	1	PWR	rpart
kappa		0.198511				PWR	rpart
mcnemar					0.000316423	PWR	rpart
sensitivity	FSHDhigh-RU	0.571429				PWR	rpart
specificity	FSHDhigh-RU	0.764706				PWR	rpart
pos_pred_value	FSHDhigh-RU	0.222222				PWR	rpart
neg_pred_value	FSHDhigh-RU	0.938144				PWR	rpart
precision	FSHDhigh-RU	0.222222				PWR	rpart
recall	FSHDhigh-RU	0.571429				PWR	rpart
f1	FSHDhigh-RU	0.32				PWR	rpart
prevalence	FSHDhigh-RU	0.105263				PWR	rpart
detection_rate	FSHDhigh-RU	0.0601504				PWR	rpart
detection_prevalence	FSHDhigh-RU	0.270677				PWR	rpart
balanced_accuracy	FSHDhigh-RU	0.668067				PWR	rpart
accuracy		0.699248	0.613713	0.775674	1	PWR	C5.0
kappa		0.0909091				PWR	C5.0
mcnemar					0.00027624	PWR	C5.0
sensitivity	FSHDhigh-RU	0.428571				PWR	C5.0
specificity	FSHDhigh-RU	0.731092				PWR	C5.0
pos_pred_value	FSHDhigh-RU	0.157895				PWR	C5.0
neg_pred_value	FSHDhigh-RU	0.915789				PWR	C5.0
precision	FSHDhigh-RU	0.157895				PWR	C5.0
recall	FSHDhigh-RU	0.428571				PWR	C5.0
f1	FSHDhigh-RU	0.230769				PWR	C5.0
prevalence	FSHDhigh-RU	0.105263				PWR	C5.0
detection_rate	FSHDhigh-RU	0.0451128				PWR	C5.0
detection_prevalence	FSHDhigh-RU	0.285714				PWR	C5.0
balanced_accuracy	FSHDhigh-RU	0.579832				PWR	C5.0
accuracy		0.578947	0.490311	0.663989	1	PWR	knn
kappa		-0.0472441				PWR	knn
mcnemar					2.91e-06	PWR	knn
sensitivity	FSHDhigh-RU	0.285714				PWR	knn
specificity	FSHDhigh-RU	0.613445				PWR	knn
pos_pred_value	FSHDhigh-RU	0.08				PWR	knn
neg_pred_value	FSHDhigh-RU	0.879518				PWR	knn
precision	FSHDhigh-RU	0.08				PWR	knn
recall	FSHDhigh-RU	0.285714				PWR	knn
f1	FSHDhigh-RU	0.125				PWR	knn
prevalence	FSHDhigh-RU	0.105263				PWR	knn
detection_rate	FSHDhigh-RU	0.0300752				PWR	knn
detection_prevalence	FSHDhigh-RU	0.37594				PWR	knn
balanced_accuracy	FSHDhigh-RU	0.44958				PWR	knn
accuracy		0.699248	0.613713	0.775674	1	PWR	earth
kappa		0.179266				PWR	earth
mcnemar					4.53329e-06	PWR	earth
sensitivity	FSHDhigh-RU	0.642857				PWR	earth
specificity	FSHDhigh-RU	0.705882				PWR	earth
pos_pred_value	FSHDhigh-RU	0.204545				PWR	earth
neg_pred_value	FSHDhigh-RU	0.94382				PWR	earth
precision	FSHDhigh-RU	0.204545				PWR	earth
recall	FSHDhigh-RU	0.642857				PWR	earth
f1	FSHDhigh-RU	0.310345				PWR	earth
prevalence	FSHDhigh-RU	0.105263				PWR	earth
detection_rate	FSHDhigh-RU	0.0676692				PWR	earth
detection_prevalence	FSHDhigh-RU	0.330827				PWR	earth
balanced_accuracy	FSHDhigh-RU	0.67437				PWR	earth
accuracy		0.744361	0.661504	0.816014	1	CTR	glmnet
kappa		0.279018				CTR	glmnet
mcnemar					3.64851e-06	CTR	glmnet
sensitivity	FSHDhigh-RU	0.785714				CTR	glmnet
specificity	FSHDhigh-RU	0.739496				CTR	glmnet
pos_pred_value	FSHDhigh-RU	0.261905				CTR	glmnet
neg_pred_value	FSHDhigh-RU	0.967033				CTR	glmnet
precision	FSHDhigh-RU	0.261905				CTR	glmnet
recall	FSHDhigh-RU	0.785714				CTR	glmnet
f1	FSHDhigh-RU	0.392857				CTR	glmnet
prevalence	FSHDhigh-RU	0.105263				CTR	glmnet
detection_rate	FSHDhigh-RU	0.0827068				CTR	glmnet
detection_prevalence	FSHDhigh-RU	0.315789				CTR	glmnet
balanced_accuracy	FSHDhigh-RU	0.762605				CTR	glmnet
accuracy		0.654135	0.566794	0.734444	1	CTR	svmLinear
kappa		0.164436				CTR	svmLinear
mcnemar					4.88758e-08	CTR	svmLinear
sensitivity	FSHDhigh-RU	0.714286				CTR	svmLinear
specificity	FSHDhigh-RU	0.647059				CTR	svmLinear
pos_pred_value	FSHDhigh-RU	0.192308				CTR	svmLinear
neg_pred_value	FSHDhigh-RU	0.950617				CTR	svmLinear
precision	FSHDhigh-RU	0.192308				CTR	svmLinear
recall	FSHDhigh-RU	0.714286				CTR	svmLinear
f1	FSHDhigh-RU	0.30303				CTR	svmLinear
prevalence	FSHDhigh-RU	0.105263				CTR	svmLinear
detection_rate	FSHDhigh-RU	0.075188				CTR	svmLinear
detection_prevalence	FSHDhigh-RU	0.390977				CTR	svmLinear
balanced_accuracy	FSHDhigh-RU	0.680672				CTR	svmLinear
accuracy		0.661654	0.574558	0.741373	1	CTR	svmRadial
kappa		0.170708				CTR	svmRadial
mcnemar					8.02511e-08	CTR	svmRadial
sensitivity	FSHDhigh-RU	0.714286				CTR	svmRadial
specificity	FSHDhigh-RU	0.655462				CTR	svmRadial
pos_pred_value	FSHDhigh-RU	0.196078				CTR	svmRadial
neg_pred_value	FSHDhigh-RU	0.95122				CTR	svmRadial
precision	FSHDhigh-RU	0.196078				CTR	svmRadial
recall	FSHDhigh-RU	0.714286				CTR	svmRadial
f1	FSHDhigh-RU	0.307692				CTR	svmRadial
prevalence	FSHDhigh-RU	0.105263				CTR	svmRadial
detection_rate	FSHDhigh-RU	0.075188				CTR	svmRadial
detection_prevalence	FSHDhigh-RU	0.383459				CTR	svmRadial
balanced_accuracy	FSHDhigh-RU	0.684874				CTR	svmRadial
accuracy		0.759398	0.67765	0.829239	0.999998	CTR	svmLinearWeights2
kappa		0.272727				CTR	svmLinearWeights2
mcnemar					4.78548e-05	CTR	svmLinearWeights2
sensitivity	FSHDhigh-RU	0.714286				CTR	svmLinearWeights2
specificity	FSHDhigh-RU	0.764706				CTR	svmLinearWeights2
pos_pred_value	FSHDhigh-RU	0.263158				CTR	svmLinearWeights2
neg_pred_value	FSHDhigh-RU	0.957895				CTR	svmLinearWeights2
precision	FSHDhigh-RU	0.263158				CTR	svmLinearWeights2
recall	FSHDhigh-RU	0.714286				CTR	svmLinearWeights2
f1	FSHDhigh-RU	0.384615				CTR	svmLinearWeights2
prevalence	FSHDhigh-RU	0.105263				CTR	svmLinearWeights2
detection_rate	FSHDhigh-RU	0.075188				CTR	svmLinearWeights2
detection_prevalence	FSHDhigh-RU	0.285714				CTR	svmLinearWeights2
balanced_accuracy	FSHDhigh-RU	0.739496				CTR	svmLinearWeights2
accuracy		0.691729	0.605835	0.768861	1	CTR	nb
kappa		0.197734				CTR	nb
mcnemar					5.80602e-07	CTR	nb
sensitivity	FSHDhigh-RU	0.714286				CTR	nb
specificity	FSHDhigh-RU	0.689076				CTR	nb
pos_pred_value	FSHDhigh-RU	0.212766				CTR	nb
neg_pred_value	FSHDhigh-RU	0.953488				CTR	nb
precision	FSHDhigh-RU	0.212766				CTR	nb
recall	FSHDhigh-RU	0.714286				CTR	nb
f1	FSHDhigh-RU	0.327869				CTR	nb
prevalence	FSHDhigh-RU	0.105263				CTR	nb
detection_rate	FSHDhigh-RU	0.075188				CTR	nb
detection_prevalence	FSHDhigh-RU	0.353383				CTR	nb
balanced_accuracy	FSHDhigh-RU	0.701681				CTR	nb
accuracy		0.669173	0.582343	0.748279	1	CTR	rf
kappa		0.15213				CTR	rf
mcnemar					6.52688e-07	CTR	rf
sensitivity	FSHDhigh-RU	0.642857				CTR	rf
specificity	FSHDhigh-RU	0.672269				CTR	rf
pos_pred_value	FSHDhigh-RU	0.1875				CTR	rf
neg_pred_value	FSHDhigh-RU	0.941176				CTR	rf
precision	FSHDhigh-RU	0.1875				CTR	rf
recall	FSHDhigh-RU	0.642857				CTR	rf
f1	FSHDhigh-RU	0.290323				CTR	rf
prevalence	FSHDhigh-RU	0.105263				CTR	rf
detection_rate	FSHDhigh-RU	0.0676692				CTR	rf
detection_prevalence	FSHDhigh-RU	0.360902				CTR	rf
balanced_accuracy	FSHDhigh-RU	0.657563				CTR	rf
accuracy		0.887218	0.820812	0.935485	0.675119	CTR	ctree2
kappa		-0.0142349				CTR	ctree2
mcnemar					0.00194577	CTR	ctree2
sensitivity	FSHDhigh-RU	0				CTR	ctree2
specificity	FSHDhigh-RU	0.991597				CTR	ctree2
pos_pred_value	FSHDhigh-RU	0				CTR	ctree2
neg_pred_value	FSHDhigh-RU	0.893939				CTR	ctree2
precision	FSHDhigh-RU	0				CTR	ctree2
recall	FSHDhigh-RU	0				CTR	ctree2
f1	FSHDhigh-RU	#NUM!				CTR	ctree2
prevalence	FSHDhigh-RU	0.105263				CTR	ctree2
detection_rate	FSHDhigh-RU	0				CTR	ctree2
detection_prevalence	FSHDhigh-RU	0.0075188				CTR	ctree2
balanced_accuracy	FSHDhigh-RU	0.495798				CTR	ctree2
accuracy		0.736842	0.653473	0.809358	1	CTR	rpart
kappa		0.218566				CTR	rpart
mcnemar					4.97623e-05	CTR	rpart
sensitivity	FSHDhigh-RU	0.642857				CTR	rpart
specificity	FSHDhigh-RU	0.747899				CTR	rpart
pos_pred_value	FSHDhigh-RU	0.230769				CTR	rpart
neg_pred_value	FSHDhigh-RU	0.946809				CTR	rpart
precision	FSHDhigh-RU	0.230769				CTR	rpart
recall	FSHDhigh-RU	0.642857				CTR	rpart
f1	FSHDhigh-RU	0.339623				CTR	rpart
prevalence	FSHDhigh-RU	0.105263				CTR	rpart
detection_rate	FSHDhigh-RU	0.0676692				CTR	rpart
detection_prevalence	FSHDhigh-RU	0.293233				CTR	rpart
balanced_accuracy	FSHDhigh-RU	0.695378				CTR	rpart
accuracy		0.714286	0.629541	0.789226	1	CTR	C5.0
kappa		0.104218				CTR	C5.0
mcnemar					0.000657654	CTR	C5.0
sensitivity	FSHDhigh-RU	0.428571				CTR	C5.0
specificity	FSHDhigh-RU	0.747899				CTR	C5.0
pos_pred_value	FSHDhigh-RU	0.166667				CTR	C5.0
neg_pred_value	FSHDhigh-RU	0.917526				CTR	C5.0
precision	FSHDhigh-RU	0.166667				CTR	C5.0
recall	FSHDhigh-RU	0.428571				CTR	C5.0
f1	FSHDhigh-RU	0.24				CTR	C5.0
prevalence	FSHDhigh-RU	0.105263				CTR	C5.0
detection_rate	FSHDhigh-RU	0.0451128				CTR	C5.0
detection_prevalence	FSHDhigh-RU	0.270677				CTR	C5.0
balanced_accuracy	FSHDhigh-RU	0.588235				CTR	C5.0
accuracy		0.676692	0.590151	0.755163	1	CTR	knn
kappa		0.131775				CTR	knn
mcnemar					4.76318e-06	CTR	knn
sensitivity	FSHDhigh-RU	0.571429				CTR	knn
specificity	FSHDhigh-RU	0.689076				CTR	knn
pos_pred_value	FSHDhigh-RU	0.177778				CTR	knn
neg_pred_value	FSHDhigh-RU	0.931818				CTR	knn
precision	FSHDhigh-RU	0.177778				CTR	knn
recall	FSHDhigh-RU	0.571429				CTR	knn
f1	FSHDhigh-RU	0.271186				CTR	knn
prevalence	FSHDhigh-RU	0.105263				CTR	knn
detection_rate	FSHDhigh-RU	0.0601504				CTR	knn
detection_prevalence	FSHDhigh-RU	0.338346				CTR	knn
balanced_accuracy	FSHDhigh-RU	0.630252				CTR	knn
accuracy		0.691729	0.605835	0.768861	1	CTR	earth
kappa		0.115778				CTR	earth
mcnemar					4.8964e-05	CTR	earth
sensitivity	FSHDhigh-RU	0.5				CTR	earth
specificity	FSHDhigh-RU	0.714286				CTR	earth
pos_pred_value	FSHDhigh-RU	0.170732				CTR	earth
neg_pred_value	FSHDhigh-RU	0.923913				CTR	earth
precision	FSHDhigh-RU	0.170732				CTR	earth
recall	FSHDhigh-RU	0.5				CTR	earth
f1	FSHDhigh-RU	0.254545				CTR	earth
prevalence	FSHDhigh-RU	0.105263				CTR	earth
detection_rate	FSHDhigh-RU	0.0526316				CTR	earth
detection_prevalence	FSHDhigh-RU	0.308271				CTR	earth
balanced_accuracy	FSHDhigh-RU	0.607143				CTR	earth
accuracy		0.766917	0.685767	0.835807	0.999994	PCA	glmnet
kappa		0.307873				PCA	glmnet
mcnemar					1.62866e-05	PCA	glmnet
sensitivity	FSHDhigh-RU	0.785714				PCA	glmnet
specificity	FSHDhigh-RU	0.764706				PCA	glmnet
pos_pred_value	FSHDhigh-RU	0.282051				PCA	glmnet
neg_pred_value	FSHDhigh-RU	0.968085				PCA	glmnet
precision	FSHDhigh-RU	0.282051				PCA	glmnet
recall	FSHDhigh-RU	0.785714				PCA	glmnet
f1	FSHDhigh-RU	0.415094				PCA	glmnet
prevalence	FSHDhigh-RU	0.105263				PCA	glmnet
detection_rate	FSHDhigh-RU	0.0827068				PCA	glmnet
detection_prevalence	FSHDhigh-RU	0.293233				PCA	glmnet
balanced_accuracy	FSHDhigh-RU	0.77521				PCA	glmnet
accuracy		0.766917	0.685767	0.835807	0.999994	PCA	svmLinear
kappa		0.282582				PCA	svmLinear
mcnemar					7.77224e-05	PCA	svmLinear
sensitivity	FSHDhigh-RU	0.714286				PCA	svmLinear
specificity	FSHDhigh-RU	0.773109				PCA	svmLinear
pos_pred_value	FSHDhigh-RU	0.27027				PCA	svmLinear
neg_pred_value	FSHDhigh-RU	0.958333				PCA	svmLinear
precision	FSHDhigh-RU	0.27027				PCA	svmLinear
recall	FSHDhigh-RU	0.714286				PCA	svmLinear
f1	FSHDhigh-RU	0.392157				PCA	svmLinear
prevalence	FSHDhigh-RU	0.105263				PCA	svmLinear
detection_rate	FSHDhigh-RU	0.075188				PCA	svmLinear
detection_prevalence	FSHDhigh-RU	0.278195				PCA	svmLinear
balanced_accuracy	FSHDhigh-RU	0.743697				PCA	svmLinear
accuracy		0.669173	0.582343	0.748279	1	PCA	svmRadial
kappa		0.177165				PCA	svmRadial
mcnemar					1.31711e-07	PCA	svmRadial
sensitivity	FSHDhigh-RU	0.714286				PCA	svmRadial
specificity	FSHDhigh-RU	0.663866				PCA	svmRadial
pos_pred_value	FSHDhigh-RU	0.2				PCA	svmRadial
neg_pred_value	FSHDhigh-RU	0.951807				PCA	svmRadial
precision	FSHDhigh-RU	0.2				PCA	svmRadial
recall	FSHDhigh-RU	0.714286				PCA	svmRadial
f1	FSHDhigh-RU	0.3125				PCA	svmRadial
prevalence	FSHDhigh-RU	0.105263				PCA	svmRadial
detection_rate	FSHDhigh-RU	0.075188				PCA	svmRadial
detection_prevalence	FSHDhigh-RU	0.37594				PCA	svmRadial
balanced_accuracy	FSHDhigh-RU	0.689076				PCA	svmRadial
accuracy		0.774436	0.693915	0.842343	0.999983	PCA	svmLinearWeights2
kappa		0.341801				PCA	svmLinearWeights2
mcnemar					5.01033e-06	PCA	svmLinearWeights2
sensitivity	FSHDhigh-RU	0.857143				PCA	svmLinearWeights2
specificity	FSHDhigh-RU	0.764706				PCA	svmLinearWeights2
pos_pred_value	FSHDhigh-RU	0.3				PCA	svmLinearWeights2
neg_pred_value	FSHDhigh-RU	0.978495				PCA	svmLinearWeights2
precision	FSHDhigh-RU	0.3				PCA	svmLinearWeights2
recall	FSHDhigh-RU	0.857143				PCA	svmLinearWeights2
f1	FSHDhigh-RU	0.444444				PCA	svmLinearWeights2
prevalence	FSHDhigh-RU	0.105263				PCA	svmLinearWeights2
detection_rate	FSHDhigh-RU	0.0902256				PCA	svmLinearWeights2
detection_prevalence	FSHDhigh-RU	0.300752				PCA	svmLinearWeights2
balanced_accuracy	FSHDhigh-RU	0.810924				PCA	svmLinearWeights2
accuracy		0.75188	0.669563	0.822641	0.999999	PCA	nb
kappa		0.26322				PCA	nb
mcnemar					2.9426e-05	PCA	nb
sensitivity	FSHDhigh-RU	0.714286				PCA	nb
specificity	FSHDhigh-RU	0.756303				PCA	nb
pos_pred_value	FSHDhigh-RU	0.25641				PCA	nb
neg_pred_value	FSHDhigh-RU	0.957447				PCA	nb
precision	FSHDhigh-RU	0.25641				PCA	nb
recall	FSHDhigh-RU	0.714286				PCA	nb
f1	FSHDhigh-RU	0.377358				PCA	nb
prevalence	FSHDhigh-RU	0.105263				PCA	nb
detection_rate	FSHDhigh-RU	0.075188				PCA	nb
detection_prevalence	FSHDhigh-RU	0.293233				PCA	nb
balanced_accuracy	FSHDhigh-RU	0.735294				PCA	nb
accuracy		0.81203	0.73515	0.874507	0.998591	PCA	rf
kappa		0.399494				PCA	rf
mcnemar					6.33425e-05	PCA	rf
sensitivity	FSHDhigh-RU	0.857143				PCA	rf
specificity	FSHDhigh-RU	0.806723				PCA	rf
pos_pred_value	FSHDhigh-RU	0.342857				PCA	rf
neg_pred_value	FSHDhigh-RU	0.979592				PCA	rf
precision	FSHDhigh-RU	0.342857				PCA	rf
recall	FSHDhigh-RU	0.857143				PCA	rf
f1	FSHDhigh-RU	0.489796				PCA	rf
prevalence	FSHDhigh-RU	0.105263				PCA	rf
detection_rate	FSHDhigh-RU	0.0902256				PCA	rf
detection_prevalence	FSHDhigh-RU	0.263158				PCA	rf
balanced_accuracy	FSHDhigh-RU	0.831933				PCA	rf
accuracy		0.819549	0.743507	0.880826	0.997007	PCA	ctree2
kappa		0.271565				PCA	ctree2
mcnemar					0.0661926	PCA	ctree2
sensitivity	FSHDhigh-RU	0.5				PCA	ctree2
specificity	FSHDhigh-RU	0.857143				PCA	ctree2
pos_pred_value	FSHDhigh-RU	0.291667				PCA	ctree2
neg_pred_value	FSHDhigh-RU	0.93578				PCA	ctree2
precision	FSHDhigh-RU	0.291667				PCA	ctree2
recall	FSHDhigh-RU	0.5				PCA	ctree2
f1	FSHDhigh-RU	0.368421				PCA	ctree2
prevalence	FSHDhigh-RU	0.105263				PCA	ctree2
detection_rate	FSHDhigh-RU	0.0526316				PCA	ctree2
detection_prevalence	FSHDhigh-RU	0.180451				PCA	ctree2
balanced_accuracy	FSHDhigh-RU	0.678571				PCA	ctree2
accuracy		0.781955	0.702094	0.848846	0.999955	PCA	rpart
kappa		0.303413				PCA	rpart
mcnemar					0.000204084	PCA	rpart
sensitivity	FSHDhigh-RU	0.714286				PCA	rpart
specificity	FSHDhigh-RU	0.789916				PCA	rpart
pos_pred_value	FSHDhigh-RU	0.285714				PCA	rpart
neg_pred_value	FSHDhigh-RU	0.959184				PCA	rpart
precision	FSHDhigh-RU	0.285714				PCA	rpart
recall	FSHDhigh-RU	0.714286				PCA	rpart
f1	FSHDhigh-RU	0.408163				PCA	rpart
prevalence	FSHDhigh-RU	0.105263				PCA	rpart
detection_rate	FSHDhigh-RU	0.075188				PCA	rpart
detection_prevalence	FSHDhigh-RU	0.263158				PCA	rpart
balanced_accuracy	FSHDhigh-RU	0.752101				PCA	rpart
accuracy		0.781955	0.702094	0.848846	0.999955	PCA	C5.0
kappa		0.246238				PCA	C5.0
mcnemar					0.00296711	PCA	C5.0
sensitivity	FSHDhigh-RU	0.571429				PCA	C5.0
specificity	FSHDhigh-RU	0.806723				PCA	C5.0
pos_pred_value	FSHDhigh-RU	0.258065				PCA	C5.0
neg_pred_value	FSHDhigh-RU	0.941176				PCA	C5.0
precision	FSHDhigh-RU	0.258065				PCA	C5.0
recall	FSHDhigh-RU	0.571429				PCA	C5.0
f1	FSHDhigh-RU	0.355556				PCA	C5.0
prevalence	FSHDhigh-RU	0.105263				PCA	C5.0
detection_rate	FSHDhigh-RU	0.0601504				PCA	C5.0
detection_prevalence	FSHDhigh-RU	0.233083				PCA	C5.0
balanced_accuracy	FSHDhigh-RU	0.689076				PCA	C5.0
accuracy		0.691729	0.605835	0.768861	1	PCA	knn
kappa		0.144896				PCA	knn
mcnemar					1.22626e-05	PCA	knn
sensitivity	FSHDhigh-RU	0.571429				PCA	knn
specificity	FSHDhigh-RU	0.705882				PCA	knn
pos_pred_value	FSHDhigh-RU	0.186047				PCA	knn
neg_pred_value	FSHDhigh-RU	0.933333				PCA	knn
precision	FSHDhigh-RU	0.186047				PCA	knn
recall	FSHDhigh-RU	0.571429				PCA	knn
f1	FSHDhigh-RU	0.280702				PCA	knn
prevalence	FSHDhigh-RU	0.105263				PCA	knn
detection_rate	FSHDhigh-RU	0.0601504				PCA	knn
detection_prevalence	FSHDhigh-RU	0.323308				PCA	knn
balanced_accuracy	FSHDhigh-RU	0.638655				PCA	knn
accuracy		0.804511	0.726833	0.868147	0.999365	PCA	earth
kappa		0.363402				PCA	earth
mcnemar					0.000194383	PCA	earth
sensitivity	FSHDhigh-RU	0.785714				PCA	earth
specificity	FSHDhigh-RU	0.806723				PCA	earth
pos_pred_value	FSHDhigh-RU	0.323529				PCA	earth
neg_pred_value	FSHDhigh-RU	0.969697				PCA	earth
precision	FSHDhigh-RU	0.323529				PCA	earth
recall	FSHDhigh-RU	0.785714				PCA	earth
f1	FSHDhigh-RU	0.458333				PCA	earth
prevalence	FSHDhigh-RU	0.105263				PCA	earth
detection_rate	FSHDhigh-RU	0.0827068				PCA	earth
detection_prevalence	FSHDhigh-RU	0.255639				PCA	earth
balanced_accuracy	FSHDhigh-RU	0.796218				PCA	earth
accuracy		0.721805	0.637492	0.795963	1	SPA	glmnet
kappa		0.228321				SPA	glmnet
mcnemar					4.16105e-06	SPA	glmnet
sensitivity	FSHDhigh-RU	0.714286				SPA	glmnet
specificity	FSHDhigh-RU	0.722689				SPA	glmnet
pos_pred_value	FSHDhigh-RU	0.232558				SPA	glmnet
neg_pred_value	FSHDhigh-RU	0.955556				SPA	glmnet
precision	FSHDhigh-RU	0.232558				SPA	glmnet
recall	FSHDhigh-RU	0.714286				SPA	glmnet
f1	FSHDhigh-RU	0.350877				SPA	glmnet
prevalence	FSHDhigh-RU	0.105263				SPA	glmnet
detection_rate	FSHDhigh-RU	0.075188				SPA	glmnet
detection_prevalence	FSHDhigh-RU	0.323308				SPA	glmnet
balanced_accuracy	FSHDhigh-RU	0.718487				SPA	glmnet
accuracy		0.721805	0.637492	0.795963	1	SPA	svmLinear
kappa		0.228321				SPA	svmLinear
mcnemar					4.16105e-06	SPA	svmLinear
sensitivity	FSHDhigh-RU	0.714286				SPA	svmLinear
specificity	FSHDhigh-RU	0.722689				SPA	svmLinear
pos_pred_value	FSHDhigh-RU	0.232558				SPA	svmLinear
neg_pred_value	FSHDhigh-RU	0.955556				SPA	svmLinear
precision	FSHDhigh-RU	0.232558				SPA	svmLinear
recall	FSHDhigh-RU	0.714286				SPA	svmLinear
f1	FSHDhigh-RU	0.350877				SPA	svmLinear
prevalence	FSHDhigh-RU	0.105263				SPA	svmLinear
detection_rate	FSHDhigh-RU	0.075188				SPA	svmLinear
detection_prevalence	FSHDhigh-RU	0.323308				SPA	svmLinear
balanced_accuracy	FSHDhigh-RU	0.718487				SPA	svmLinear
accuracy		0.669173	0.582343	0.748279	1	SPA	svmRadial
kappa		0.15213				SPA	svmRadial
mcnemar					6.52688e-07	SPA	svmRadial
sensitivity	FSHDhigh-RU	0.642857				SPA	svmRadial
specificity	FSHDhigh-RU	0.672269				SPA	svmRadial
pos_pred_value	FSHDhigh-RU	0.1875				SPA	svmRadial
neg_pred_value	FSHDhigh-RU	0.941176				SPA	svmRadial
precision	FSHDhigh-RU	0.1875				SPA	svmRadial
recall	FSHDhigh-RU	0.642857				SPA	svmRadial
f1	FSHDhigh-RU	0.290323				SPA	svmRadial
prevalence	FSHDhigh-RU	0.105263				SPA	svmRadial
detection_rate	FSHDhigh-RU	0.0676692				SPA	svmRadial
detection_prevalence	FSHDhigh-RU	0.360902				SPA	svmRadial
balanced_accuracy	FSHDhigh-RU	0.657563				SPA	svmRadial
accuracy		0.744361	0.661504	0.816014	1	SPA	svmLinearWeights2
kappa		0.279018				SPA	svmLinearWeights2
mcnemar					3.64851e-06	SPA	svmLinearWeights2
sensitivity	FSHDhigh-RU	0.785714				SPA	svmLinearWeights2
specificity	FSHDhigh-RU	0.739496				SPA	svmLinearWeights2
pos_pred_value	FSHDhigh-RU	0.261905				SPA	svmLinearWeights2
neg_pred_value	FSHDhigh-RU	0.967033				SPA	svmLinearWeights2
precision	FSHDhigh-RU	0.261905				SPA	svmLinearWeights2
recall	FSHDhigh-RU	0.785714				SPA	svmLinearWeights2
f1	FSHDhigh-RU	0.392857				SPA	svmLinearWeights2
prevalence	FSHDhigh-RU	0.105263				SPA	svmLinearWeights2
detection_rate	FSHDhigh-RU	0.0827068				SPA	svmLinearWeights2
detection_prevalence	FSHDhigh-RU	0.315789				SPA	svmLinearWeights2
balanced_accuracy	FSHDhigh-RU	0.762605				SPA	svmLinearWeights2
accuracy		0.601504	0.513043	0.68534	1	SPA	nb
kappa		0.147333				SPA	nb
mcnemar					2.63967e-10	SPA	nb
sensitivity	FSHDhigh-RU	0.785714				SPA	nb
specificity	FSHDhigh-RU	0.579832				SPA	nb
pos_pred_value	FSHDhigh-RU	0.180328				SPA	nb
neg_pred_value	FSHDhigh-RU	0.958333				SPA	nb
precision	FSHDhigh-RU	0.180328				SPA	nb
recall	FSHDhigh-RU	0.785714				SPA	nb
f1	FSHDhigh-RU	0.293333				SPA	nb
prevalence	FSHDhigh-RU	0.105263				SPA	nb
detection_rate	FSHDhigh-RU	0.0827068				SPA	nb
detection_prevalence	FSHDhigh-RU	0.458647				SPA	nb
balanced_accuracy	FSHDhigh-RU	0.682773				SPA	nb
accuracy		0.684211	0.597981	0.762024	1	SPA	rf
kappa		0.214567				SPA	rf
mcnemar					6.6412e-08	SPA	rf
sensitivity	FSHDhigh-RU	0.785714				SPA	rf
specificity	FSHDhigh-RU	0.672269				SPA	rf
pos_pred_value	FSHDhigh-RU	0.22				SPA	rf
neg_pred_value	FSHDhigh-RU	0.963855				SPA	rf
precision	FSHDhigh-RU	0.22				SPA	rf
recall	FSHDhigh-RU	0.785714				SPA	rf
f1	FSHDhigh-RU	0.34375				SPA	rf
prevalence	FSHDhigh-RU	0.105263				SPA	rf
detection_rate	FSHDhigh-RU	0.0827068				SPA	rf
detection_prevalence	FSHDhigh-RU	0.37594				SPA	rf
balanced_accuracy	FSHDhigh-RU	0.728992				SPA	rf
accuracy		0.894737	0.829695	0.941245	0.570546	SPA	ctree2
kappa		0.101351				SPA	ctree2
mcnemar					0.00328346	SPA	ctree2
sensitivity	FSHDhigh-RU	0.0714286				SPA	ctree2
specificity	FSHDhigh-RU	0.991597				SPA	ctree2
pos_pred_value	FSHDhigh-RU	0.5				SPA	ctree2
neg_pred_value	FSHDhigh-RU	0.900763				SPA	ctree2
precision	FSHDhigh-RU	0.5				SPA	ctree2
recall	FSHDhigh-RU	0.0714286				SPA	ctree2
f1	FSHDhigh-RU	0.125				SPA	ctree2
prevalence	FSHDhigh-RU	0.105263				SPA	ctree2
detection_rate	FSHDhigh-RU	0.0075188				SPA	ctree2
detection_prevalence	FSHDhigh-RU	0.0150376				SPA	ctree2
balanced_accuracy	FSHDhigh-RU	0.531513				SPA	ctree2
accuracy		0.639098	0.551332	0.72052	1	SPA	rpart
kappa		0.152416				SPA	rpart
mcnemar					1.81084e-08	SPA	rpart
sensitivity	FSHDhigh-RU	0.714286				SPA	rpart
specificity	FSHDhigh-RU	0.630252				SPA	rpart
pos_pred_value	FSHDhigh-RU	0.185185				SPA	rpart
neg_pred_value	FSHDhigh-RU	0.949367				SPA	rpart
precision	FSHDhigh-RU	0.185185				SPA	rpart
recall	FSHDhigh-RU	0.714286				SPA	rpart
f1	FSHDhigh-RU	0.294118				SPA	rpart
prevalence	FSHDhigh-RU	0.105263				SPA	rpart
detection_rate	FSHDhigh-RU	0.075188				SPA	rpart
detection_prevalence	FSHDhigh-RU	0.406015				SPA	rpart
balanced_accuracy	FSHDhigh-RU	0.672269				SPA	rpart
accuracy		0.654135	0.566794	0.734444	1	SPA	C5.0
kappa		0.164436				SPA	C5.0
mcnemar					4.88758e-08	SPA	C5.0
sensitivity	FSHDhigh-RU	0.714286				SPA	C5.0
specificity	FSHDhigh-RU	0.647059				SPA	C5.0
pos_pred_value	FSHDhigh-RU	0.192308				SPA	C5.0
neg_pred_value	FSHDhigh-RU	0.950617				SPA	C5.0
precision	FSHDhigh-RU	0.192308				SPA	C5.0
recall	FSHDhigh-RU	0.714286				SPA	C5.0
f1	FSHDhigh-RU	0.30303				SPA	C5.0
prevalence	FSHDhigh-RU	0.105263				SPA	C5.0
detection_rate	FSHDhigh-RU	0.075188				SPA	C5.0
detection_prevalence	FSHDhigh-RU	0.390977				SPA	C5.0
balanced_accuracy	FSHDhigh-RU	0.680672				SPA	C5.0
accuracy		0.609023	0.52066	0.692417	1	SPA	knn
kappa		0.130282				SPA	knn
mcnemar					2.47607e-09	SPA	knn
sensitivity	FSHDhigh-RU	0.714286				SPA	knn
specificity	FSHDhigh-RU	0.596639				SPA	knn
pos_pred_value	FSHDhigh-RU	0.172414				SPA	knn
neg_pred_value	FSHDhigh-RU	0.946667				SPA	knn
precision	FSHDhigh-RU	0.172414				SPA	knn
recall	FSHDhigh-RU	0.714286				SPA	knn
f1	FSHDhigh-RU	0.277778				SPA	knn
prevalence	FSHDhigh-RU	0.105263				SPA	knn
detection_rate	FSHDhigh-RU	0.075188				SPA	knn
detection_prevalence	FSHDhigh-RU	0.43609				SPA	knn
balanced_accuracy	FSHDhigh-RU	0.655462				SPA	knn
accuracy		0.706767	0.621614	0.782462	1	SPA	earth
kappa		0.186608				SPA	earth
mcnemar					7.33982e-06	SPA	earth
sensitivity	FSHDhigh-RU	0.642857				SPA	earth
specificity	FSHDhigh-RU	0.714286				SPA	earth
pos_pred_value	FSHDhigh-RU	0.209302				SPA	earth
neg_pred_value	FSHDhigh-RU	0.944444				SPA	earth
precision	FSHDhigh-RU	0.209302				SPA	earth
recall	FSHDhigh-RU	0.642857				SPA	earth
f1	FSHDhigh-RU	0.315789				SPA	earth
prevalence	FSHDhigh-RU	0.105263				SPA	earth
detection_rate	FSHDhigh-RU	0.0676692				SPA	earth
detection_prevalence	FSHDhigh-RU	0.323308				SPA	earth
balanced_accuracy	FSHDhigh-RU	0.678571				SPA	earth

## Sheet: Suppl.TableS7
term	class	estimate	conf.low	conf.high	p.value	prep	method
accuracy		0.834586	0.760341	0.893337	0.97526	NTH	glmnet
kappa		0.436006				NTH	glmnet
mcnemar					0.00138379	NTH	glmnet
sensitivity	FSHDvar+	0.8				NTH	glmnet
specificity	FSHDvar+	0.838983				NTH	glmnet
pos_pred_value	FSHDvar+	0.387097				NTH	glmnet
neg_pred_value	FSHDvar+	0.970588				NTH	glmnet
precision	FSHDvar+	0.387097				NTH	glmnet
recall	FSHDvar+	0.8				NTH	glmnet
f1	FSHDvar+	0.521739				NTH	glmnet
prevalence	FSHDvar+	0.112782				NTH	glmnet
detection_rate	FSHDvar+	0.0902256				NTH	glmnet
detection_prevalence	FSHDvar+	0.233083				NTH	glmnet
balanced_accuracy	FSHDvar+	0.819492				NTH	glmnet
accuracy		0.81203	0.73515	0.874507	0.996338	NTH	svmLinear
kappa		0.371574				NTH	svmLinear
mcnemar					0.00137428	NTH	svmLinear
sensitivity	FSHDvar+	0.733333				NTH	svmLinear
specificity	FSHDvar+	0.822034				NTH	svmLinear
pos_pred_value	FSHDvar+	0.34375				NTH	svmLinear
neg_pred_value	FSHDvar+	0.960396				NTH	svmLinear
precision	FSHDvar+	0.34375				NTH	svmLinear
recall	FSHDvar+	0.733333				NTH	svmLinear
f1	FSHDvar+	0.468085				NTH	svmLinear
prevalence	FSHDvar+	0.112782				NTH	svmLinear
detection_rate	FSHDvar+	0.0827068				NTH	svmLinear
detection_prevalence	FSHDvar+	0.240602				NTH	svmLinear
balanced_accuracy	FSHDvar+	0.777684				NTH	svmLinear
accuracy		0.864662	0.794564	0.917775	0.832415	NTH	svmRadial
kappa		0.498744				NTH	svmRadial
mcnemar					0.00952189	NTH	svmRadial
sensitivity	FSHDvar+	0.8				NTH	svmRadial
specificity	FSHDvar+	0.872881				NTH	svmRadial
pos_pred_value	FSHDvar+	0.444444				NTH	svmRadial
neg_pred_value	FSHDvar+	0.971698				NTH	svmRadial
precision	FSHDvar+	0.444444				NTH	svmRadial
recall	FSHDvar+	0.8				NTH	svmRadial
f1	FSHDvar+	0.571429				NTH	svmRadial
prevalence	FSHDvar+	0.112782				NTH	svmRadial
detection_rate	FSHDvar+	0.0902256				NTH	svmRadial
detection_prevalence	FSHDvar+	0.203008				NTH	svmRadial
balanced_accuracy	FSHDvar+	0.836441				NTH	svmRadial
accuracy		0.857143	0.785932	0.911746	0.888632	NTH	svmLinearWeights2
kappa		0.503048				NTH	svmLinearWeights2
mcnemar					0.00131897	NTH	svmLinearWeights2
sensitivity	FSHDvar+	0.866667				NTH	svmLinearWeights2
specificity	FSHDvar+	0.855932				NTH	svmLinearWeights2
pos_pred_value	FSHDvar+	0.433333				NTH	svmLinearWeights2
neg_pred_value	FSHDvar+	0.980583				NTH	svmLinearWeights2
precision	FSHDvar+	0.433333				NTH	svmLinearWeights2
recall	FSHDvar+	0.866667				NTH	svmLinearWeights2
f1	FSHDvar+	0.577778				NTH	svmLinearWeights2
prevalence	FSHDvar+	0.112782				NTH	svmLinearWeights2
detection_rate	FSHDvar+	0.0977444				NTH	svmLinearWeights2
detection_prevalence	FSHDvar+	0.225564				NTH	svmLinearWeights2
balanced_accuracy	FSHDvar+	0.861299				NTH	svmLinearWeights2
accuracy		0.81203	0.73515	0.874507	0.996338	NTH	nb
kappa		0.395125				NTH	nb
mcnemar					0.000318217	NTH	nb
sensitivity	FSHDvar+	0.8				NTH	nb
specificity	FSHDvar+	0.813559				NTH	nb
pos_pred_value	FSHDvar+	0.352941				NTH	nb
neg_pred_value	FSHDvar+	0.969697				NTH	nb
precision	FSHDvar+	0.352941				NTH	nb
recall	FSHDvar+	0.8				NTH	nb
f1	FSHDvar+	0.489796				NTH	nb
prevalence	FSHDvar+	0.112782				NTH	nb
detection_rate	FSHDvar+	0.0902256				NTH	nb
detection_prevalence	FSHDvar+	0.255639				NTH	nb
balanced_accuracy	FSHDvar+	0.80678				NTH	nb
accuracy		0.857143	0.785932	0.911746	0.888632	NTH	rf
kappa		0.503048				NTH	rf
mcnemar					0.00131897	NTH	rf
sensitivity	FSHDvar+	0.866667				NTH	rf
specificity	FSHDvar+	0.855932				NTH	rf
pos_pred_value	FSHDvar+	0.433333				NTH	rf
neg_pred_value	FSHDvar+	0.980583				NTH	rf
precision	FSHDvar+	0.433333				NTH	rf
recall	FSHDvar+	0.866667				NTH	rf
f1	FSHDvar+	0.577778				NTH	rf
prevalence	FSHDvar+	0.112782				NTH	rf
detection_rate	FSHDvar+	0.0977444				NTH	rf
detection_prevalence	FSHDvar+	0.225564				NTH	rf
balanced_accuracy	FSHDvar+	0.861299				NTH	rf
accuracy		0.879699	0.812	0.92965	0.670159	NTH	ctree2
kappa		0.512374				NTH	ctree2
mcnemar					0.0801183	NTH	ctree2
sensitivity	FSHDvar+	0.733333				NTH	ctree2
specificity	FSHDvar+	0.898305				NTH	ctree2
pos_pred_value	FSHDvar+	0.478261				NTH	ctree2
neg_pred_value	FSHDvar+	0.963636				NTH	ctree2
precision	FSHDvar+	0.478261				NTH	ctree2
recall	FSHDvar+	0.733333				NTH	ctree2
f1	FSHDvar+	0.578947				NTH	ctree2
prevalence	FSHDvar+	0.112782				NTH	ctree2
detection_rate	FSHDvar+	0.0827068				NTH	ctree2
detection_prevalence	FSHDvar+	0.172932				NTH	ctree2
balanced_accuracy	FSHDvar+	0.815819				NTH	ctree2
accuracy		0.857143	0.785932	0.911746	0.888632	NTH	rpart
kappa		0.459234				NTH	rpart
mcnemar					0.0217815	NTH	rpart
sensitivity	FSHDvar+	0.733333				NTH	rpart
specificity	FSHDvar+	0.872881				NTH	rpart
pos_pred_value	FSHDvar+	0.423077				NTH	rpart
neg_pred_value	FSHDvar+	0.962617				NTH	rpart
precision	FSHDvar+	0.423077				NTH	rpart
recall	FSHDvar+	0.733333				NTH	rpart
f1	FSHDvar+	0.536585				NTH	rpart
prevalence	FSHDvar+	0.112782				NTH	rpart
detection_rate	FSHDvar+	0.0827068				NTH	rpart
detection_prevalence	FSHDvar+	0.195489				NTH	rpart
balanced_accuracy	FSHDvar+	0.803107				NTH	rpart
accuracy		0.849624	0.777353	0.905661	0.929366	NTH	C5.0
kappa		0.466078				NTH	C5.0
mcnemar					0.00365043	NTH	C5.0
sensitivity	FSHDvar+	0.8				NTH	C5.0
specificity	FSHDvar+	0.855932				NTH	C5.0
pos_pred_value	FSHDvar+	0.413793				NTH	C5.0
neg_pred_value	FSHDvar+	0.971154				NTH	C5.0
precision	FSHDvar+	0.413793				NTH	C5.0
recall	FSHDvar+	0.8				NTH	C5.0
f1	FSHDvar+	0.545455				NTH	C5.0
prevalence	FSHDvar+	0.112782				NTH	C5.0
detection_rate	FSHDvar+	0.0902256				NTH	C5.0
detection_prevalence	FSHDvar+	0.218045				NTH	C5.0
balanced_accuracy	FSHDvar+	0.827966				NTH	C5.0
accuracy		0.548872	0.460274	0.635246	1	NTH	knn
kappa		0.0594059				NTH	knn
mcnemar					1.29776e-09	NTH	knn
sensitivity	FSHDvar+	0.6				NTH	knn
specificity	FSHDvar+	0.542373				NTH	knn
pos_pred_value	FSHDvar+	0.142857				NTH	knn
neg_pred_value	FSHDvar+	0.914286				NTH	knn
precision	FSHDvar+	0.142857				NTH	knn
recall	FSHDvar+	0.6				NTH	knn
f1	FSHDvar+	0.230769				NTH	knn
prevalence	FSHDvar+	0.112782				NTH	knn
detection_rate	FSHDvar+	0.0676692				NTH	knn
detection_prevalence	FSHDvar+	0.473684				NTH	knn
balanced_accuracy	FSHDvar+	0.571186				NTH	knn
accuracy		0.827068	0.751903	0.887103	0.986321	NTH	earth
kappa		0.443515				NTH	earth
mcnemar					0.00017455	NTH	earth
sensitivity	FSHDvar+	0.866667				NTH	earth
specificity	FSHDvar+	0.822034				NTH	earth
pos_pred_value	FSHDvar+	0.382353				NTH	earth
neg_pred_value	FSHDvar+	0.979798				NTH	earth
precision	FSHDvar+	0.382353				NTH	earth
recall	FSHDvar+	0.866667				NTH	earth
f1	FSHDvar+	0.530612				NTH	earth
prevalence	FSHDvar+	0.112782				NTH	earth
detection_rate	FSHDvar+	0.0977444				NTH	earth
detection_prevalence	FSHDvar+	0.255639				NTH	earth
balanced_accuracy	FSHDvar+	0.84435				NTH	earth
accuracy		0.834586	0.760341	0.893337	0.97526	BOX	glmnet
kappa		0.457545				BOX	glmnet
mcnemar					0.000289619	BOX	glmnet
sensitivity	FSHDvar+	0.866667				BOX	glmnet
specificity	FSHDvar+	0.830508				BOX	glmnet
pos_pred_value	FSHDvar+	0.393939				BOX	glmnet
neg_pred_value	FSHDvar+	0.98				BOX	glmnet
precision	FSHDvar+	0.393939				BOX	glmnet
recall	FSHDvar+	0.866667				BOX	glmnet
f1	FSHDvar+	0.541667				BOX	glmnet
prevalence	FSHDvar+	0.112782				BOX	glmnet
detection_rate	FSHDvar+	0.0977444				BOX	glmnet
detection_prevalence	FSHDvar+	0.24812				BOX	glmnet
balanced_accuracy	FSHDvar+	0.848588				BOX	glmnet
accuracy		0.789474	0.710306	0.855315	0.999632	BOX	svmLinear
kappa		0.335				BOX	svmLinear
mcnemar					0.000329839	BOX	svmLinear
sensitivity	FSHDvar+	0.733333				BOX	svmLinear
specificity	FSHDvar+	0.79661				BOX	svmLinear
pos_pred_value	FSHDvar+	0.314286				BOX	svmLinear
neg_pred_value	FSHDvar+	0.959184				BOX	svmLinear
precision	FSHDvar+	0.314286				BOX	svmLinear
recall	FSHDvar+	0.733333				BOX	svmLinear
f1	FSHDvar+	0.44				BOX	svmLinear
prevalence	FSHDvar+	0.112782				BOX	svmLinear
detection_rate	FSHDvar+	0.0827068				BOX	svmLinear
detection_prevalence	FSHDvar+	0.263158				BOX	svmLinear
balanced_accuracy	FSHDvar+	0.764972				BOX	svmLinear
accuracy		0.849624	0.777353	0.905661	0.929366	BOX	svmRadial
kappa		0.443049				BOX	svmRadial
mcnemar					0.0139063	BOX	svmRadial
sensitivity	FSHDvar+	0.733333				BOX	svmRadial
specificity	FSHDvar+	0.864407				BOX	svmRadial
pos_pred_value	FSHDvar+	0.407407				BOX	svmRadial
neg_pred_value	FSHDvar+	0.962264				BOX	svmRadial
precision	FSHDvar+	0.407407				BOX	svmRadial
recall	FSHDvar+	0.733333				BOX	svmRadial
f1	FSHDvar+	0.52381				BOX	svmRadial
prevalence	FSHDvar+	0.112782				BOX	svmRadial
detection_rate	FSHDvar+	0.0827068				BOX	svmRadial
detection_prevalence	FSHDvar+	0.203008				BOX	svmRadial
balanced_accuracy	FSHDvar+	0.79887				BOX	svmRadial
accuracy		0.676692	0.590151	0.755163	1	BOX	svmLinearWeights2
kappa		0.175818				BOX	svmLinearWeights2
mcnemar					1.0611e-06	BOX	svmLinearWeights2
sensitivity	FSHDvar+	0.666667				BOX	svmLinearWeights2
specificity	FSHDvar+	0.677966				BOX	svmLinearWeights2
pos_pred_value	FSHDvar+	0.208333				BOX	svmLinearWeights2
neg_pred_value	FSHDvar+	0.941176				BOX	svmLinearWeights2
precision	FSHDvar+	0.208333				BOX	svmLinearWeights2
recall	FSHDvar+	0.666667				BOX	svmLinearWeights2
f1	FSHDvar+	0.31746				BOX	svmLinearWeights2
prevalence	FSHDvar+	0.112782				BOX	svmLinearWeights2
detection_rate	FSHDvar+	0.075188				BOX	svmLinearWeights2
detection_prevalence	FSHDvar+	0.360902				BOX	svmLinearWeights2
balanced_accuracy	FSHDvar+	0.672316				BOX	svmLinearWeights2
accuracy		0.834586	0.760341	0.893337	0.97526	BOX	nb
kappa		0.412686				BOX	nb
mcnemar					0.00557799	BOX	nb
sensitivity	FSHDvar+	0.733333				BOX	nb
specificity	FSHDvar+	0.847458				BOX	nb
pos_pred_value	FSHDvar+	0.37931				BOX	nb
neg_pred_value	FSHDvar+	0.961538				BOX	nb
precision	FSHDvar+	0.37931				BOX	nb
recall	FSHDvar+	0.733333				BOX	nb
f1	FSHDvar+	0.5				BOX	nb
prevalence	FSHDvar+	0.112782				BOX	nb
detection_rate	FSHDvar+	0.0827068				BOX	nb
detection_prevalence	FSHDvar+	0.218045				BOX	nb
balanced_accuracy	FSHDvar+	0.790395				BOX	nb
accuracy		0.842105	0.768824	0.899523	0.957228	BOX	rf
kappa		0.427547				BOX	rf
mcnemar					0.00882876	BOX	rf
sensitivity	FSHDvar+	0.733333				BOX	rf
specificity	FSHDvar+	0.855932				BOX	rf
pos_pred_value	FSHDvar+	0.392857				BOX	rf
neg_pred_value	FSHDvar+	0.961905				BOX	rf
precision	FSHDvar+	0.392857				BOX	rf
recall	FSHDvar+	0.733333				BOX	rf
f1	FSHDvar+	0.511628				BOX	rf
prevalence	FSHDvar+	0.112782				BOX	rf
detection_rate	FSHDvar+	0.0827068				BOX	rf
detection_prevalence	FSHDvar+	0.210526				BOX	rf
balanced_accuracy	FSHDvar+	0.794633				BOX	rf
accuracy		0.864662	0.794564	0.917775	0.832415	BOX	ctree2
kappa		0.498744				BOX	ctree2
mcnemar					0.00952189	BOX	ctree2
sensitivity	FSHDvar+	0.8				BOX	ctree2
specificity	FSHDvar+	0.872881				BOX	ctree2
pos_pred_value	FSHDvar+	0.444444				BOX	ctree2
neg_pred_value	FSHDvar+	0.971698				BOX	ctree2
precision	FSHDvar+	0.444444				BOX	ctree2
recall	FSHDvar+	0.8				BOX	ctree2
f1	FSHDvar+	0.571429				BOX	ctree2
prevalence	FSHDvar+	0.112782				BOX	ctree2
detection_rate	FSHDvar+	0.0902256				BOX	ctree2
detection_prevalence	FSHDvar+	0.203008				BOX	ctree2
balanced_accuracy	FSHDvar+	0.836441				BOX	ctree2
accuracy		0.827068	0.751903	0.887103	0.986321	BOX	rpart
kappa		0.421848				BOX	rpart
mcnemar					0.000849227	BOX	rpart
sensitivity	FSHDvar+	0.8				BOX	rpart
specificity	FSHDvar+	0.830508				BOX	rpart
pos_pred_value	FSHDvar+	0.375				BOX	rpart
neg_pred_value	FSHDvar+	0.970297				BOX	rpart
precision	FSHDvar+	0.375				BOX	rpart
recall	FSHDvar+	0.8				BOX	rpart
f1	FSHDvar+	0.510638				BOX	rpart
prevalence	FSHDvar+	0.112782				BOX	rpart
detection_rate	FSHDvar+	0.0902256				BOX	rpart
detection_prevalence	FSHDvar+	0.240602				BOX	rpart
balanced_accuracy	FSHDvar+	0.815254				BOX	rpart
accuracy		0.842105	0.768824	0.899523	0.957228	BOX	C5.0
kappa		0.450737				BOX	C5.0
mcnemar					0.00225023	BOX	C5.0
sensitivity	FSHDvar+	0.8				BOX	C5.0
specificity	FSHDvar+	0.847458				BOX	C5.0
pos_pred_value	FSHDvar+	0.4				BOX	C5.0
neg_pred_value	FSHDvar+	0.970874				BOX	C5.0
precision	FSHDvar+	0.4				BOX	C5.0
recall	FSHDvar+	0.8				BOX	C5.0
f1	FSHDvar+	0.533333				BOX	C5.0
prevalence	FSHDvar+	0.112782				BOX	C5.0
detection_rate	FSHDvar+	0.0902256				BOX	C5.0
detection_prevalence	FSHDvar+	0.225564				BOX	C5.0
balanced_accuracy	FSHDvar+	0.823729				BOX	C5.0
accuracy		0.62406	0.535955	0.70651	1	BOX	knn
kappa		0.0825055				BOX	knn
mcnemar					7.43098e-07	BOX	knn
sensitivity	FSHDvar+	0.533333				BOX	knn
specificity	FSHDvar+	0.635593				BOX	knn
pos_pred_value	FSHDvar+	0.156863				BOX	knn
neg_pred_value	FSHDvar+	0.914634				BOX	knn
precision	FSHDvar+	0.156863				BOX	knn
recall	FSHDvar+	0.533333				BOX	knn
f1	FSHDvar+	0.242424				BOX	knn
prevalence	FSHDvar+	0.112782				BOX	knn
detection_rate	FSHDvar+	0.0601504				BOX	knn
detection_prevalence	FSHDvar+	0.383459				BOX	knn
balanced_accuracy	FSHDvar+	0.584463				BOX	knn
accuracy		0.819549	0.743507	0.880826	0.992766	BOX	earth
kappa		0.43				BOX	earth
mcnemar					0.000105164	BOX	earth
sensitivity	FSHDvar+	0.866667				BOX	earth
specificity	FSHDvar+	0.813559				BOX	earth
pos_pred_value	FSHDvar+	0.371429				BOX	earth
neg_pred_value	FSHDvar+	0.979592				BOX	earth
precision	FSHDvar+	0.371429				BOX	earth
recall	FSHDvar+	0.866667				BOX	earth
f1	FSHDvar+	0.52				BOX	earth
prevalence	FSHDvar+	0.112782				BOX	earth
detection_rate	FSHDvar+	0.0977444				BOX	earth
detection_prevalence	FSHDvar+	0.263158				BOX	earth
balanced_accuracy	FSHDvar+	0.840113				BOX	earth
accuracy		0.81203	0.73515	0.874507	0.996338	YEO	glmnet
kappa		0.371574				YEO	glmnet
mcnemar					0.00137428	YEO	glmnet
sensitivity	FSHDvar+	0.733333				YEO	glmnet
specificity	FSHDvar+	0.822034				YEO	glmnet
pos_pred_value	FSHDvar+	0.34375				YEO	glmnet
neg_pred_value	FSHDvar+	0.960396				YEO	glmnet
precision	FSHDvar+	0.34375				YEO	glmnet
recall	FSHDvar+	0.733333				YEO	glmnet
f1	FSHDvar+	0.468085				YEO	glmnet
prevalence	FSHDvar+	0.112782				YEO	glmnet
detection_rate	FSHDvar+	0.0827068				YEO	glmnet
detection_prevalence	FSHDvar+	0.240602				YEO	glmnet
balanced_accuracy	FSHDvar+	0.777684				YEO	glmnet
accuracy		0.827068	0.751903	0.887103	0.986321	YEO	svmLinear
kappa		0.421848				YEO	svmLinear
mcnemar					0.000849227	YEO	svmLinear
sensitivity	FSHDvar+	0.8				YEO	svmLinear
specificity	FSHDvar+	0.830508				YEO	svmLinear
pos_pred_value	FSHDvar+	0.375				YEO	svmLinear
neg_pred_value	FSHDvar+	0.970297				YEO	svmLinear
precision	FSHDvar+	0.375				YEO	svmLinear
recall	FSHDvar+	0.8				YEO	svmLinear
f1	FSHDvar+	0.510638				YEO	svmLinear
prevalence	FSHDvar+	0.112782				YEO	svmLinear
detection_rate	FSHDvar+	0.0902256				YEO	svmLinear
detection_prevalence	FSHDvar+	0.240602				YEO	svmLinear
balanced_accuracy	FSHDvar+	0.815254				YEO	svmLinear
accuracy		0.87218	0.803252	0.923745	0.759349	YEO	svmRadial
kappa		0.516157				YEO	svmRadial
mcnemar					0.0152934	YEO	svmRadial
sensitivity	FSHDvar+	0.8				YEO	svmRadial
specificity	FSHDvar+	0.881356				YEO	svmRadial
pos_pred_value	FSHDvar+	0.461538				YEO	svmRadial
neg_pred_value	FSHDvar+	0.971963				YEO	svmRadial
precision	FSHDvar+	0.461538				YEO	svmRadial
recall	FSHDvar+	0.8				YEO	svmRadial
f1	FSHDvar+	0.585366				YEO	svmRadial
prevalence	FSHDvar+	0.112782				YEO	svmRadial
detection_rate	FSHDvar+	0.0902256				YEO	svmRadial
detection_prevalence	FSHDvar+	0.195489				YEO	svmRadial
balanced_accuracy	FSHDvar+	0.840678				YEO	svmRadial
accuracy		0.81203	0.73515	0.874507	0.996338	YEO	svmLinearWeights2
kappa		0.437299				YEO	svmLinearWeights2
mcnemar					1.08251e-05	YEO	svmLinearWeights2
sensitivity	FSHDvar+	0.933333				YEO	svmLinearWeights2
specificity	FSHDvar+	0.79661				YEO	svmLinearWeights2
pos_pred_value	FSHDvar+	0.368421				YEO	svmLinearWeights2
neg_pred_value	FSHDvar+	0.989474				YEO	svmLinearWeights2
precision	FSHDvar+	0.368421				YEO	svmLinearWeights2
recall	FSHDvar+	0.933333				YEO	svmLinearWeights2
f1	FSHDvar+	0.528302				YEO	svmLinearWeights2
prevalence	FSHDvar+	0.112782				YEO	svmLinearWeights2
detection_rate	FSHDvar+	0.105263				YEO	svmLinearWeights2
detection_prevalence	FSHDvar+	0.285714				YEO	svmLinearWeights2
balanced_accuracy	FSHDvar+	0.864972				YEO	svmLinearWeights2
accuracy		0.834586	0.760341	0.893337	0.97526	YEO	nb
kappa		0.436006				YEO	nb
mcnemar					0.00138379	YEO	nb
sensitivity	FSHDvar+	0.8				YEO	nb
specificity	FSHDvar+	0.838983				YEO	nb
pos_pred_value	FSHDvar+	0.387097				YEO	nb
neg_pred_value	FSHDvar+	0.970588				YEO	nb
precision	FSHDvar+	0.387097				YEO	nb
recall	FSHDvar+	0.8				YEO	nb
f1	FSHDvar+	0.521739				YEO	nb
prevalence	FSHDvar+	0.112782				YEO	nb
detection_rate	FSHDvar+	0.0902256				YEO	nb
detection_prevalence	FSHDvar+	0.233083				YEO	nb
balanced_accuracy	FSHDvar+	0.819492				YEO	nb
accuracy		0.842105	0.768824	0.899523	0.957228	YEO	rf
kappa		0.427547				YEO	rf
mcnemar					0.00882876	YEO	rf
sensitivity	FSHDvar+	0.733333				YEO	rf
specificity	FSHDvar+	0.855932				YEO	rf
pos_pred_value	FSHDvar+	0.392857				YEO	rf
neg_pred_value	FSHDvar+	0.961905				YEO	rf
precision	FSHDvar+	0.392857				YEO	rf
recall	FSHDvar+	0.733333				YEO	rf
f1	FSHDvar+	0.511628				YEO	rf
prevalence	FSHDvar+	0.112782				YEO	rf
detection_rate	FSHDvar+	0.0827068				YEO	rf
detection_prevalence	FSHDvar+	0.210526				YEO	rf
balanced_accuracy	FSHDvar+	0.794633				YEO	rf
accuracy		0.879699	0.812	0.92965	0.670159	YEO	ctree2
kappa		0.512374				YEO	ctree2
mcnemar					0.0801183	YEO	ctree2
sensitivity	FSHDvar+	0.733333				YEO	ctree2
specificity	FSHDvar+	0.898305				YEO	ctree2
pos_pred_value	FSHDvar+	0.478261				YEO	ctree2
neg_pred_value	FSHDvar+	0.963636				YEO	ctree2
precision	FSHDvar+	0.478261				YEO	ctree2
recall	FSHDvar+	0.733333				YEO	ctree2
f1	FSHDvar+	0.578947				YEO	ctree2
prevalence	FSHDvar+	0.112782				YEO	ctree2
detection_rate	FSHDvar+	0.0827068				YEO	ctree2
detection_prevalence	FSHDvar+	0.172932				YEO	ctree2
balanced_accuracy	FSHDvar+	0.815819				YEO	ctree2
accuracy		0.87218	0.803252	0.923745	0.759349	YEO	rpart
kappa		0.516157				YEO	rpart
mcnemar					0.0152934	YEO	rpart
sensitivity	FSHDvar+	0.8				YEO	rpart
specificity	FSHDvar+	0.881356				YEO	rpart
pos_pred_value	FSHDvar+	0.461538				YEO	rpart
neg_pred_value	FSHDvar+	0.971963				YEO	rpart
precision	FSHDvar+	0.461538				YEO	rpart
recall	FSHDvar+	0.8				YEO	rpart
f1	FSHDvar+	0.585366				YEO	rpart
prevalence	FSHDvar+	0.112782				YEO	rpart
detection_rate	FSHDvar+	0.0902256				YEO	rpart
detection_prevalence	FSHDvar+	0.195489				YEO	rpart
balanced_accuracy	FSHDvar+	0.840678				YEO	rpart
accuracy		0.849624	0.777353	0.905661	0.929366	YEO	C5.0
kappa		0.466078				YEO	C5.0
mcnemar					0.00365043	YEO	C5.0
sensitivity	FSHDvar+	0.8				YEO	C5.0
specificity	FSHDvar+	0.855932				YEO	C5.0
pos_pred_value	FSHDvar+	0.413793				YEO	C5.0
neg_pred_value	FSHDvar+	0.971154				YEO	C5.0
precision	FSHDvar+	0.413793				YEO	C5.0
recall	FSHDvar+	0.8				YEO	C5.0
f1	FSHDvar+	0.545455				YEO	C5.0
prevalence	FSHDvar+	0.112782				YEO	C5.0
detection_rate	FSHDvar+	0.0902256				YEO	C5.0
detection_prevalence	FSHDvar+	0.218045				YEO	C5.0
balanced_accuracy	FSHDvar+	0.827966				YEO	C5.0
accuracy		0.714286	0.629541	0.789226	1	YEO	knn
kappa		0.159348				YEO	knn
mcnemar					0.000190651	YEO	knn
sensitivity	FSHDvar+	0.533333				YEO	knn
specificity	FSHDvar+	0.737288				YEO	knn
pos_pred_value	FSHDvar+	0.205128				YEO	knn
neg_pred_value	FSHDvar+	0.925532				YEO	knn
precision	FSHDvar+	0.205128				YEO	knn
recall	FSHDvar+	0.533333				YEO	knn
f1	FSHDvar+	0.296296				YEO	knn
prevalence	FSHDvar+	0.112782				YEO	knn
detection_rate	FSHDvar+	0.0601504				YEO	knn
detection_prevalence	FSHDvar+	0.293233				YEO	knn
balanced_accuracy	FSHDvar+	0.635311				YEO	knn
accuracy		0.842105	0.768824	0.899523	0.957228	YEO	earth
kappa		0.491905				YEO	earth
mcnemar					8.5683e-05	YEO	earth
sensitivity	FSHDvar+	0.933333				YEO	earth
specificity	FSHDvar+	0.830508				YEO	earth
pos_pred_value	FSHDvar+	0.411765				YEO	earth
neg_pred_value	FSHDvar+	0.989899				YEO	earth
precision	FSHDvar+	0.411765				YEO	earth
recall	FSHDvar+	0.933333				YEO	earth
f1	FSHDvar+	0.571429				YEO	earth
prevalence	FSHDvar+	0.112782				YEO	earth
detection_rate	FSHDvar+	0.105263				YEO	earth
detection_prevalence	FSHDvar+	0.255639				YEO	earth
balanced_accuracy	FSHDvar+	0.881921				YEO	earth
accuracy		0.834586	0.760341	0.893337	0.97526	PWR	glmnet
kappa		0.457545				PWR	glmnet
mcnemar					0.000289619	PWR	glmnet
sensitivity	FSHDvar+	0.866667				PWR	glmnet
specificity	FSHDvar+	0.830508				PWR	glmnet
pos_pred_value	FSHDvar+	0.393939				PWR	glmnet
neg_pred_value	FSHDvar+	0.98				PWR	glmnet
precision	FSHDvar+	0.393939				PWR	glmnet
recall	FSHDvar+	0.866667				PWR	glmnet
f1	FSHDvar+	0.541667				PWR	glmnet
prevalence	FSHDvar+	0.112782				PWR	glmnet
detection_rate	FSHDvar+	0.0977444				PWR	glmnet
detection_prevalence	FSHDvar+	0.24812				PWR	glmnet
balanced_accuracy	FSHDvar+	0.848588				PWR	glmnet
accuracy		0.759398	0.67765	0.829239	0.99999	PWR	svmLinear
kappa		0.315536				PWR	svmLinear
mcnemar					9.89673e-06	PWR	svmLinear
sensitivity	FSHDvar+	0.8				PWR	svmLinear
specificity	FSHDvar+	0.754237				PWR	svmLinear
pos_pred_value	FSHDvar+	0.292683				PWR	svmLinear
neg_pred_value	FSHDvar+	0.967391				PWR	svmLinear
precision	FSHDvar+	0.292683				PWR	svmLinear
recall	FSHDvar+	0.8				PWR	svmLinear
f1	FSHDvar+	0.428571				PWR	svmLinear
prevalence	FSHDvar+	0.112782				PWR	svmLinear
detection_rate	FSHDvar+	0.0902256				PWR	svmLinear
detection_prevalence	FSHDvar+	0.308271				PWR	svmLinear
balanced_accuracy	FSHDvar+	0.777119				PWR	svmLinear
accuracy		0.849624	0.777353	0.905661	0.929366	PWR	svmRadial
kappa		0.443049				PWR	svmRadial
mcnemar					0.0139063	PWR	svmRadial
sensitivity	FSHDvar+	0.733333				PWR	svmRadial
specificity	FSHDvar+	0.864407				PWR	svmRadial
pos_pred_value	FSHDvar+	0.407407				PWR	svmRadial
neg_pred_value	FSHDvar+	0.962264				PWR	svmRadial
precision	FSHDvar+	0.407407				PWR	svmRadial
recall	FSHDvar+	0.733333				PWR	svmRadial
f1	FSHDvar+	0.52381				PWR	svmRadial
prevalence	FSHDvar+	0.112782				PWR	svmRadial
detection_rate	FSHDvar+	0.0827068				PWR	svmRadial
detection_prevalence	FSHDvar+	0.203008				PWR	svmRadial
balanced_accuracy	FSHDvar+	0.79887				PWR	svmRadial
accuracy		0.827068	0.751903	0.887103	0.986321	PWR	svmLinearWeights2
kappa		0.443515				PWR	svmLinearWeights2
mcnemar					0.00017455	PWR	svmLinearWeights2
sensitivity	FSHDvar+	0.866667				PWR	svmLinearWeights2
specificity	FSHDvar+	0.822034				PWR	svmLinearWeights2
pos_pred_value	FSHDvar+	0.382353				PWR	svmLinearWeights2
neg_pred_value	FSHDvar+	0.979798				PWR	svmLinearWeights2
precision	FSHDvar+	0.382353				PWR	svmLinearWeights2
recall	FSHDvar+	0.866667				PWR	svmLinearWeights2
f1	FSHDvar+	0.530612				PWR	svmLinearWeights2
prevalence	FSHDvar+	0.112782				PWR	svmLinearWeights2
detection_rate	FSHDvar+	0.0977444				PWR	svmLinearWeights2
detection_prevalence	FSHDvar+	0.255639				PWR	svmLinearWeights2
balanced_accuracy	FSHDvar+	0.84435				PWR	svmLinearWeights2
accuracy		0.827068	0.751903	0.887103	0.986321	PWR	nb
kappa		0.443515				PWR	nb
mcnemar					0.00017455	PWR	nb
sensitivity	FSHDvar+	0.866667				PWR	nb
specificity	FSHDvar+	0.822034				PWR	nb
pos_pred_value	FSHDvar+	0.382353				PWR	nb
neg_pred_value	FSHDvar+	0.979798				PWR	nb
precision	FSHDvar+	0.382353				PWR	nb
recall	FSHDvar+	0.866667				PWR	nb
f1	FSHDvar+	0.530612				PWR	nb
prevalence	FSHDvar+	0.112782				PWR	nb
detection_rate	FSHDvar+	0.0977444				PWR	nb
detection_prevalence	FSHDvar+	0.255639				PWR	nb
balanced_accuracy	FSHDvar+	0.84435				PWR	nb
accuracy		0.849624	0.777353	0.905661	0.929366	PWR	rf
kappa		0.487278				PWR	rf
mcnemar					0.00079623	PWR	rf
sensitivity	FSHDvar+	0.866667				PWR	rf
specificity	FSHDvar+	0.847458				PWR	rf
pos_pred_value	FSHDvar+	0.419355				PWR	rf
neg_pred_value	FSHDvar+	0.980392				PWR	rf
precision	FSHDvar+	0.419355				PWR	rf
recall	FSHDvar+	0.866667				PWR	rf
f1	FSHDvar+	0.565217				PWR	rf
prevalence	FSHDvar+	0.112782				PWR	rf
detection_rate	FSHDvar+	0.0977444				PWR	rf
detection_prevalence	FSHDvar+	0.233083				PWR	rf
balanced_accuracy	FSHDvar+	0.857062				PWR	rf
accuracy		0.902256	0.838655	0.946922	0.351639	PWR	ctree2
kappa		0.594227				PWR	ctree2
mcnemar					0.0960923	PWR	ctree2
sensitivity	FSHDvar+	0.8				PWR	ctree2
specificity	FSHDvar+	0.915254				PWR	ctree2
pos_pred_value	FSHDvar+	0.545455				PWR	ctree2
neg_pred_value	FSHDvar+	0.972973				PWR	ctree2
precision	FSHDvar+	0.545455				PWR	ctree2
recall	FSHDvar+	0.8				PWR	ctree2
f1	FSHDvar+	0.648649				PWR	ctree2
prevalence	FSHDvar+	0.112782				PWR	ctree2
detection_rate	FSHDvar+	0.0902256				PWR	ctree2
detection_prevalence	FSHDvar+	0.165414				PWR	ctree2
balanced_accuracy	FSHDvar+	0.857627				PWR	ctree2
accuracy		0.842105	0.768824	0.899523	0.957228	PWR	rpart
kappa		0.427547				PWR	rpart
mcnemar					0.00882876	PWR	rpart
sensitivity	FSHDvar+	0.733333				PWR	rpart
specificity	FSHDvar+	0.855932				PWR	rpart
pos_pred_value	FSHDvar+	0.392857				PWR	rpart
neg_pred_value	FSHDvar+	0.961905				PWR	rpart
precision	FSHDvar+	0.392857				PWR	rpart
recall	FSHDvar+	0.733333				PWR	rpart
f1	FSHDvar+	0.511628				PWR	rpart
prevalence	FSHDvar+	0.112782				PWR	rpart
detection_rate	FSHDvar+	0.0827068				PWR	rpart
detection_prevalence	FSHDvar+	0.210526				PWR	rpart
balanced_accuracy	FSHDvar+	0.794633				PWR	rpart
accuracy		0.857143	0.785932	0.911746	0.888632	PWR	C5.0
kappa		0.434296				PWR	C5.0
mcnemar					0.0664574	PWR	C5.0
sensitivity	FSHDvar+	0.666667				PWR	C5.0
specificity	FSHDvar+	0.881356				PWR	C5.0
pos_pred_value	FSHDvar+	0.416667				PWR	C5.0
neg_pred_value	FSHDvar+	0.954128				PWR	C5.0
precision	FSHDvar+	0.416667				PWR	C5.0
recall	FSHDvar+	0.666667				PWR	C5.0
f1	FSHDvar+	0.512821				PWR	C5.0
prevalence	FSHDvar+	0.112782				PWR	C5.0
detection_rate	FSHDvar+	0.075188				PWR	C5.0
detection_prevalence	FSHDvar+	0.180451				PWR	C5.0
balanced_accuracy	FSHDvar+	0.774011				PWR	C5.0
accuracy		0.593985	0.505446	0.678243	1	PWR	knn
kappa		0.110258				PWR	knn
mcnemar					4.86987e-09	PWR	knn
sensitivity	FSHDvar+	0.666667				PWR	knn
specificity	FSHDvar+	0.584746				PWR	knn
pos_pred_value	FSHDvar+	0.169492				PWR	knn
neg_pred_value	FSHDvar+	0.932432				PWR	knn
precision	FSHDvar+	0.169492				PWR	knn
recall	FSHDvar+	0.666667				PWR	knn
f1	FSHDvar+	0.27027				PWR	knn
prevalence	FSHDvar+	0.112782				PWR	knn
detection_rate	FSHDvar+	0.075188				PWR	knn
detection_prevalence	FSHDvar+	0.443609				PWR	knn
balanced_accuracy	FSHDvar+	0.625706				PWR	knn
accuracy		0.827068	0.751903	0.887103	0.986321	PWR	earth
kappa		0.421848				PWR	earth
mcnemar					0.000849227	PWR	earth
sensitivity	FSHDvar+	0.8				PWR	earth
specificity	FSHDvar+	0.830508				PWR	earth
pos_pred_value	FSHDvar+	0.375				PWR	earth
neg_pred_value	FSHDvar+	0.970297				PWR	earth
precision	FSHDvar+	0.375				PWR	earth
recall	FSHDvar+	0.8				PWR	earth
f1	FSHDvar+	0.510638				PWR	earth
prevalence	FSHDvar+	0.112782				PWR	earth
detection_rate	FSHDvar+	0.0902256				PWR	earth
detection_prevalence	FSHDvar+	0.240602				PWR	earth
balanced_accuracy	FSHDvar+	0.815254				PWR	earth
accuracy		0.834586	0.760341	0.893337	0.97526	CTR	glmnet
kappa		0.436006				CTR	glmnet
mcnemar					0.00138379	CTR	glmnet
sensitivity	FSHDvar+	0.8				CTR	glmnet
specificity	FSHDvar+	0.838983				CTR	glmnet
pos_pred_value	FSHDvar+	0.387097				CTR	glmnet
neg_pred_value	FSHDvar+	0.970588				CTR	glmnet
precision	FSHDvar+	0.387097				CTR	glmnet
recall	FSHDvar+	0.8				CTR	glmnet
f1	FSHDvar+	0.521739				CTR	glmnet
prevalence	FSHDvar+	0.112782				CTR	glmnet
detection_rate	FSHDvar+	0.0902256				CTR	glmnet
detection_prevalence	FSHDvar+	0.233083				CTR	glmnet
balanced_accuracy	FSHDvar+	0.819492				CTR	glmnet
accuracy		0.819549	0.743507	0.880826	0.992766	CTR	svmLinear
kappa		0.408231				CTR	svmLinear
mcnemar					0.000520244	CTR	svmLinear
sensitivity	FSHDvar+	0.8				CTR	svmLinear
specificity	FSHDvar+	0.822034				CTR	svmLinear
pos_pred_value	FSHDvar+	0.363636				CTR	svmLinear
neg_pred_value	FSHDvar+	0.97				CTR	svmLinear
precision	FSHDvar+	0.363636				CTR	svmLinear
recall	FSHDvar+	0.8				CTR	svmLinear
f1	FSHDvar+	0.5				CTR	svmLinear
prevalence	FSHDvar+	0.112782				CTR	svmLinear
detection_rate	FSHDvar+	0.0902256				CTR	svmLinear
detection_prevalence	FSHDvar+	0.24812				CTR	svmLinear
balanced_accuracy	FSHDvar+	0.811017				CTR	svmLinear
accuracy		0.87218	0.803252	0.923745	0.759349	CTR	svmRadial
kappa		0.493844				CTR	svmRadial
mcnemar					0.0523451	CTR	svmRadial
sensitivity	FSHDvar+	0.733333				CTR	svmRadial
specificity	FSHDvar+	0.889831				CTR	svmRadial
pos_pred_value	FSHDvar+	0.458333				CTR	svmRadial
neg_pred_value	FSHDvar+	0.963303				CTR	svmRadial
precision	FSHDvar+	0.458333				CTR	svmRadial
recall	FSHDvar+	0.733333				CTR	svmRadial
f1	FSHDvar+	0.564103				CTR	svmRadial
prevalence	FSHDvar+	0.112782				CTR	svmRadial
detection_rate	FSHDvar+	0.0827068				CTR	svmRadial
detection_prevalence	FSHDvar+	0.180451				CTR	svmRadial
balanced_accuracy	FSHDvar+	0.811582				CTR	svmRadial
accuracy		0.834586	0.760341	0.893337	0.97526	CTR	svmLinearWeights2
kappa		0.436006				CTR	svmLinearWeights2
mcnemar					0.00138379	CTR	svmLinearWeights2
sensitivity	FSHDvar+	0.8				CTR	svmLinearWeights2
specificity	FSHDvar+	0.838983				CTR	svmLinearWeights2
pos_pred_value	FSHDvar+	0.387097				CTR	svmLinearWeights2
neg_pred_value	FSHDvar+	0.970588				CTR	svmLinearWeights2
precision	FSHDvar+	0.387097				CTR	svmLinearWeights2
recall	FSHDvar+	0.8				CTR	svmLinearWeights2
f1	FSHDvar+	0.521739				CTR	svmLinearWeights2
prevalence	FSHDvar+	0.112782				CTR	svmLinearWeights2
detection_rate	FSHDvar+	0.0902256				CTR	svmLinearWeights2
detection_prevalence	FSHDvar+	0.233083				CTR	svmLinearWeights2
balanced_accuracy	FSHDvar+	0.819492				CTR	svmLinearWeights2
accuracy		0.81203	0.73515	0.874507	0.996338	CTR	nb
kappa		0.371574				CTR	nb
mcnemar					0.00137428	CTR	nb
sensitivity	FSHDvar+	0.733333				CTR	nb
specificity	FSHDvar+	0.822034				CTR	nb
pos_pred_value	FSHDvar+	0.34375				CTR	nb
neg_pred_value	FSHDvar+	0.960396				CTR	nb
precision	FSHDvar+	0.34375				CTR	nb
recall	FSHDvar+	0.733333				CTR	nb
f1	FSHDvar+	0.468085				CTR	nb
prevalence	FSHDvar+	0.112782				CTR	nb
detection_rate	FSHDvar+	0.0827068				CTR	nb
detection_prevalence	FSHDvar+	0.240602				CTR	nb
balanced_accuracy	FSHDvar+	0.777684				CTR	nb
accuracy		0.857143	0.785932	0.911746	0.888632	CTR	rf
kappa		0.503048				CTR	rf
mcnemar					0.00131897	CTR	rf
sensitivity	FSHDvar+	0.866667				CTR	rf
specificity	FSHDvar+	0.855932				CTR	rf
pos_pred_value	FSHDvar+	0.433333				CTR	rf
neg_pred_value	FSHDvar+	0.980583				CTR	rf
precision	FSHDvar+	0.433333				CTR	rf
recall	FSHDvar+	0.866667				CTR	rf
f1	FSHDvar+	0.577778				CTR	rf
prevalence	FSHDvar+	0.112782				CTR	rf
detection_rate	FSHDvar+	0.0977444				CTR	rf
detection_prevalence	FSHDvar+	0.225564				CTR	rf
balanced_accuracy	FSHDvar+	0.861299				CTR	rf
accuracy		0.894737	0.829695	0.941245	0.459469	CTR	ctree2
kappa		0.573327				CTR	ctree2
mcnemar					0.0613688	CTR	ctree2
sensitivity	FSHDvar+	0.8				CTR	ctree2
specificity	FSHDvar+	0.90678				CTR	ctree2
pos_pred_value	FSHDvar+	0.521739				CTR	ctree2
neg_pred_value	FSHDvar+	0.972727				CTR	ctree2
precision	FSHDvar+	0.521739				CTR	ctree2
recall	FSHDvar+	0.8				CTR	ctree2
f1	FSHDvar+	0.631579				CTR	ctree2
prevalence	FSHDvar+	0.112782				CTR	ctree2
detection_rate	FSHDvar+	0.0902256				CTR	ctree2
detection_prevalence	FSHDvar+	0.172932				CTR	ctree2
balanced_accuracy	FSHDvar+	0.85339				CTR	ctree2
accuracy		0.857143	0.785932	0.911746	0.888632	CTR	rpart
kappa		0.459234				CTR	rpart
mcnemar					0.0217815	CTR	rpart
sensitivity	FSHDvar+	0.733333				CTR	rpart
specificity	FSHDvar+	0.872881				CTR	rpart
pos_pred_value	FSHDvar+	0.423077				CTR	rpart
neg_pred_value	FSHDvar+	0.962617				CTR	rpart
precision	FSHDvar+	0.423077				CTR	rpart
recall	FSHDvar+	0.733333				CTR	rpart
f1	FSHDvar+	0.536585				CTR	rpart
prevalence	FSHDvar+	0.112782				CTR	rpart
detection_rate	FSHDvar+	0.0827068				CTR	rpart
detection_prevalence	FSHDvar+	0.195489				CTR	rpart
balanced_accuracy	FSHDvar+	0.803107				CTR	rpart
accuracy		0.857143	0.785932	0.911746	0.888632	CTR	C5.0
kappa		0.459234				CTR	C5.0
mcnemar					0.0217815	CTR	C5.0
sensitivity	FSHDvar+	0.733333				CTR	C5.0
specificity	FSHDvar+	0.872881				CTR	C5.0
pos_pred_value	FSHDvar+	0.423077				CTR	C5.0
neg_pred_value	FSHDvar+	0.962617				CTR	C5.0
precision	FSHDvar+	0.423077				CTR	C5.0
recall	FSHDvar+	0.733333				CTR	C5.0
f1	FSHDvar+	0.536585				CTR	C5.0
prevalence	FSHDvar+	0.112782				CTR	C5.0
detection_rate	FSHDvar+	0.0827068				CTR	C5.0
detection_prevalence	FSHDvar+	0.195489				CTR	C5.0
balanced_accuracy	FSHDvar+	0.803107				CTR	C5.0
accuracy		0.879699	0.812	0.92965	0.670159	CTR	knn
kappa		0.512374				CTR	knn
mcnemar					0.0801183	CTR	knn
sensitivity	FSHDvar+	0.733333				CTR	knn
specificity	FSHDvar+	0.898305				CTR	knn
pos_pred_value	FSHDvar+	0.478261				CTR	knn
neg_pred_value	FSHDvar+	0.963636				CTR	knn
precision	FSHDvar+	0.478261				CTR	knn
recall	FSHDvar+	0.733333				CTR	knn
f1	FSHDvar+	0.578947				CTR	knn
prevalence	FSHDvar+	0.112782				CTR	knn
detection_rate	FSHDvar+	0.0827068				CTR	knn
detection_prevalence	FSHDvar+	0.172932				CTR	knn
balanced_accuracy	FSHDvar+	0.815819				CTR	knn
accuracy		0.834586	0.760341	0.893337	0.97526	CTR	earth
kappa		0.457545				CTR	earth
mcnemar					0.000289619	CTR	earth
sensitivity	FSHDvar+	0.866667				CTR	earth
specificity	FSHDvar+	0.830508				CTR	earth
pos_pred_value	FSHDvar+	0.393939				CTR	earth
neg_pred_value	FSHDvar+	0.98				CTR	earth
precision	FSHDvar+	0.393939				CTR	earth
recall	FSHDvar+	0.866667				CTR	earth
f1	FSHDvar+	0.541667				CTR	earth
prevalence	FSHDvar+	0.112782				CTR	earth
detection_rate	FSHDvar+	0.0977444				CTR	earth
detection_prevalence	FSHDvar+	0.24812				CTR	earth
balanced_accuracy	FSHDvar+	0.848588				CTR	earth
accuracy		0.849624	0.777353	0.905661	0.929366	PCA	glmnet
kappa		0.466078				PCA	glmnet
mcnemar					0.00365043	PCA	glmnet
sensitivity	FSHDvar+	0.8				PCA	glmnet
specificity	FSHDvar+	0.855932				PCA	glmnet
pos_pred_value	FSHDvar+	0.413793				PCA	glmnet
neg_pred_value	FSHDvar+	0.971154				PCA	glmnet
precision	FSHDvar+	0.413793				PCA	glmnet
recall	FSHDvar+	0.8				PCA	glmnet
f1	FSHDvar+	0.545455				PCA	glmnet
prevalence	FSHDvar+	0.112782				PCA	glmnet
detection_rate	FSHDvar+	0.0902256				PCA	glmnet
detection_prevalence	FSHDvar+	0.218045				PCA	glmnet
balanced_accuracy	FSHDvar+	0.827966				PCA	glmnet
accuracy		0.819549	0.743507	0.880826	0.992766	PCA	svmLinear
kappa		0.331658				PCA	svmLinear
mcnemar					0.0247447	PCA	svmLinear
sensitivity	FSHDvar+	0.6				PCA	svmLinear
specificity	FSHDvar+	0.847458				PCA	svmLinear
pos_pred_value	FSHDvar+	0.333333				PCA	svmLinear
neg_pred_value	FSHDvar+	0.943396				PCA	svmLinear
precision	FSHDvar+	0.333333				PCA	svmLinear
recall	FSHDvar+	0.6				PCA	svmLinear
f1	FSHDvar+	0.428571				PCA	svmLinear
prevalence	FSHDvar+	0.112782				PCA	svmLinear
detection_rate	FSHDvar+	0.0676692				PCA	svmLinear
detection_prevalence	FSHDvar+	0.203008				PCA	svmLinear
balanced_accuracy	FSHDvar+	0.723729				PCA	svmLinear
accuracy		0.864662	0.794564	0.917775	0.832415	PCA	svmRadial
kappa		0.476149				PCA	svmRadial
mcnemar					0.0338949	PCA	svmRadial
sensitivity	FSHDvar+	0.733333				PCA	svmRadial
specificity	FSHDvar+	0.881356				PCA	svmRadial
pos_pred_value	FSHDvar+	0.44				PCA	svmRadial
neg_pred_value	FSHDvar+	0.962963				PCA	svmRadial
precision	FSHDvar+	0.44				PCA	svmRadial
recall	FSHDvar+	0.733333				PCA	svmRadial
f1	FSHDvar+	0.55				PCA	svmRadial
prevalence	FSHDvar+	0.112782				PCA	svmRadial
detection_rate	FSHDvar+	0.0827068				PCA	svmRadial
detection_prevalence	FSHDvar+	0.18797				PCA	svmRadial
balanced_accuracy	FSHDvar+	0.807345				PCA	svmRadial
accuracy		0.834586	0.760341	0.893337	0.97526	PCA	svmLinearWeights2
kappa		0.436006				PCA	svmLinearWeights2
mcnemar					0.00138379	PCA	svmLinearWeights2
sensitivity	FSHDvar+	0.8				PCA	svmLinearWeights2
specificity	FSHDvar+	0.838983				PCA	svmLinearWeights2
pos_pred_value	FSHDvar+	0.387097				PCA	svmLinearWeights2
neg_pred_value	FSHDvar+	0.970588				PCA	svmLinearWeights2
precision	FSHDvar+	0.387097				PCA	svmLinearWeights2
recall	FSHDvar+	0.8				PCA	svmLinearWeights2
f1	FSHDvar+	0.521739				PCA	svmLinearWeights2
prevalence	FSHDvar+	0.112782				PCA	svmLinearWeights2
detection_rate	FSHDvar+	0.0902256				PCA	svmLinearWeights2
detection_prevalence	FSHDvar+	0.233083				PCA	svmLinearWeights2
balanced_accuracy	FSHDvar+	0.819492				PCA	svmLinearWeights2
accuracy		0.81203	0.73515	0.874507	0.996338	PCA	nb
kappa		0.395125				PCA	nb
mcnemar					0.000318217	PCA	nb
sensitivity	FSHDvar+	0.8				PCA	nb
specificity	FSHDvar+	0.813559				PCA	nb
pos_pred_value	FSHDvar+	0.352941				PCA	nb
neg_pred_value	FSHDvar+	0.969697				PCA	nb
precision	FSHDvar+	0.352941				PCA	nb
recall	FSHDvar+	0.8				PCA	nb
f1	FSHDvar+	0.489796				PCA	nb
prevalence	FSHDvar+	0.112782				PCA	nb
detection_rate	FSHDvar+	0.0902256				PCA	nb
detection_prevalence	FSHDvar+	0.255639				PCA	nb
balanced_accuracy	FSHDvar+	0.80678				PCA	nb
accuracy		0.842105	0.768824	0.899523	0.957228	PCA	rf
kappa		0.450737				PCA	rf
mcnemar					0.00225023	PCA	rf
sensitivity	FSHDvar+	0.8				PCA	rf
specificity	FSHDvar+	0.847458				PCA	rf
pos_pred_value	FSHDvar+	0.4				PCA	rf
neg_pred_value	FSHDvar+	0.970874				PCA	rf
precision	FSHDvar+	0.4				PCA	rf
recall	FSHDvar+	0.8				PCA	rf
f1	FSHDvar+	0.533333				PCA	rf
prevalence	FSHDvar+	0.112782				PCA	rf
detection_rate	FSHDvar+	0.0902256				PCA	rf
detection_prevalence	FSHDvar+	0.225564				PCA	rf
balanced_accuracy	FSHDvar+	0.823729				PCA	rf
accuracy		0.864662	0.794564	0.917775	0.832415	PCA	ctree2
kappa		0.476149				PCA	ctree2
mcnemar					0.0338949	PCA	ctree2
sensitivity	FSHDvar+	0.733333				PCA	ctree2
specificity	FSHDvar+	0.881356				PCA	ctree2
pos_pred_value	FSHDvar+	0.44				PCA	ctree2
neg_pred_value	FSHDvar+	0.962963				PCA	ctree2
precision	FSHDvar+	0.44				PCA	ctree2
recall	FSHDvar+	0.733333				PCA	ctree2
f1	FSHDvar+	0.55				PCA	ctree2
prevalence	FSHDvar+	0.112782				PCA	ctree2
detection_rate	FSHDvar+	0.0827068				PCA	ctree2
detection_prevalence	FSHDvar+	0.18797				PCA	ctree2
balanced_accuracy	FSHDvar+	0.807345				PCA	ctree2
accuracy		0.857143	0.785932	0.911746	0.888632	PCA	rpart
kappa		0.459234				PCA	rpart
mcnemar					0.0217815	PCA	rpart
sensitivity	FSHDvar+	0.733333				PCA	rpart
specificity	FSHDvar+	0.872881				PCA	rpart
pos_pred_value	FSHDvar+	0.423077				PCA	rpart
neg_pred_value	FSHDvar+	0.962617				PCA	rpart
precision	FSHDvar+	0.423077				PCA	rpart
recall	FSHDvar+	0.733333				PCA	rpart
f1	FSHDvar+	0.536585				PCA	rpart
prevalence	FSHDvar+	0.112782				PCA	rpart
detection_rate	FSHDvar+	0.0827068				PCA	rpart
detection_prevalence	FSHDvar+	0.195489				PCA	rpart
balanced_accuracy	FSHDvar+	0.803107				PCA	rpart
accuracy		0.849624	0.777353	0.905661	0.929366	PCA	C5.0
kappa		0.390467				PCA	C5.0
mcnemar					0.117525	PCA	C5.0
sensitivity	FSHDvar+	0.6				PCA	C5.0
specificity	FSHDvar+	0.881356				PCA	C5.0
pos_pred_value	FSHDvar+	0.391304				PCA	C5.0
neg_pred_value	FSHDvar+	0.945455				PCA	C5.0
precision	FSHDvar+	0.391304				PCA	C5.0
recall	FSHDvar+	0.6				PCA	C5.0
f1	FSHDvar+	0.473684				PCA	C5.0
prevalence	FSHDvar+	0.112782				PCA	C5.0
detection_rate	FSHDvar+	0.0676692				PCA	C5.0
detection_prevalence	FSHDvar+	0.172932				PCA	C5.0
balanced_accuracy	FSHDvar+	0.740678				PCA	C5.0
accuracy		0.864662	0.794564	0.917775	0.832415	PCA	knn
kappa		0.51947				PCA	knn
mcnemar					0.00218304	PCA	knn
sensitivity	FSHDvar+	0.866667				PCA	knn
specificity	FSHDvar+	0.864407				PCA	knn
pos_pred_value	FSHDvar+	0.448276				PCA	knn
neg_pred_value	FSHDvar+	0.980769				PCA	knn
precision	FSHDvar+	0.448276				PCA	knn
recall	FSHDvar+	0.866667				PCA	knn
f1	FSHDvar+	0.590909				PCA	knn
prevalence	FSHDvar+	0.112782				PCA	knn
detection_rate	FSHDvar+	0.0977444				PCA	knn
detection_prevalence	FSHDvar+	0.218045				PCA	knn
balanced_accuracy	FSHDvar+	0.865537				PCA	knn
accuracy		0.804511	0.726833	0.868147	0.998225	PCA	earth
kappa		0.3825				PCA	earth
mcnemar					0.000194383	PCA	earth
sensitivity	FSHDvar+	0.8				PCA	earth
specificity	FSHDvar+	0.805085				PCA	earth
pos_pred_value	FSHDvar+	0.342857				PCA	earth
neg_pred_value	FSHDvar+	0.969388				PCA	earth
precision	FSHDvar+	0.342857				PCA	earth
recall	FSHDvar+	0.8				PCA	earth
f1	FSHDvar+	0.48				PCA	earth
prevalence	FSHDvar+	0.112782				PCA	earth
detection_rate	FSHDvar+	0.0902256				PCA	earth
detection_prevalence	FSHDvar+	0.263158				PCA	earth
balanced_accuracy	FSHDvar+	0.802542				PCA	earth
accuracy		0.842105	0.768824	0.899523	0.957228	SPA	glmnet
kappa		0.450737				SPA	glmnet
mcnemar					0.00225023	SPA	glmnet
sensitivity	FSHDvar+	0.8				SPA	glmnet
specificity	FSHDvar+	0.847458				SPA	glmnet
pos_pred_value	FSHDvar+	0.4				SPA	glmnet
neg_pred_value	FSHDvar+	0.970874				SPA	glmnet
precision	FSHDvar+	0.4				SPA	glmnet
recall	FSHDvar+	0.8				SPA	glmnet
f1	FSHDvar+	0.533333				SPA	glmnet
prevalence	FSHDvar+	0.112782				SPA	glmnet
detection_rate	FSHDvar+	0.0902256				SPA	glmnet
detection_prevalence	FSHDvar+	0.225564				SPA	glmnet
balanced_accuracy	FSHDvar+	0.823729				SPA	glmnet
accuracy		0.781955	0.702094	0.848846	0.999842	SPA	svmLinear
kappa		0.347267				SPA	svmLinear
mcnemar					4.40204e-05	SPA	svmLinear
sensitivity	FSHDvar+	0.8				SPA	svmLinear
specificity	FSHDvar+	0.779661				SPA	svmLinear
pos_pred_value	FSHDvar+	0.315789				SPA	svmLinear
neg_pred_value	FSHDvar+	0.968421				SPA	svmLinear
precision	FSHDvar+	0.315789				SPA	svmLinear
recall	FSHDvar+	0.8				SPA	svmLinear
f1	FSHDvar+	0.45283				SPA	svmLinear
prevalence	FSHDvar+	0.112782				SPA	svmLinear
detection_rate	FSHDvar+	0.0902256				SPA	svmLinear
detection_prevalence	FSHDvar+	0.285714				SPA	svmLinear
balanced_accuracy	FSHDvar+	0.789831				SPA	svmLinear
accuracy		0.857143	0.785932	0.911746	0.888632	SPA	svmRadial
kappa		0.459234				SPA	svmRadial
mcnemar					0.0217815	SPA	svmRadial
sensitivity	FSHDvar+	0.733333				SPA	svmRadial
specificity	FSHDvar+	0.872881				SPA	svmRadial
pos_pred_value	FSHDvar+	0.423077				SPA	svmRadial
neg_pred_value	FSHDvar+	0.962617				SPA	svmRadial
precision	FSHDvar+	0.423077				SPA	svmRadial
recall	FSHDvar+	0.733333				SPA	svmRadial
f1	FSHDvar+	0.536585				SPA	svmRadial
prevalence	FSHDvar+	0.112782				SPA	svmRadial
detection_rate	FSHDvar+	0.0827068				SPA	svmRadial
detection_prevalence	FSHDvar+	0.195489				SPA	svmRadial
balanced_accuracy	FSHDvar+	0.803107				SPA	svmRadial
accuracy		0.842105	0.768824	0.899523	0.957228	SPA	svmLinearWeights2
kappa		0.450737				SPA	svmLinearWeights2
mcnemar					0.00225023	SPA	svmLinearWeights2
sensitivity	FSHDvar+	0.8				SPA	svmLinearWeights2
specificity	FSHDvar+	0.847458				SPA	svmLinearWeights2
pos_pred_value	FSHDvar+	0.4				SPA	svmLinearWeights2
neg_pred_value	FSHDvar+	0.970874				SPA	svmLinearWeights2
precision	FSHDvar+	0.4				SPA	svmLinearWeights2
recall	FSHDvar+	0.8				SPA	svmLinearWeights2
f1	FSHDvar+	0.533333				SPA	svmLinearWeights2
prevalence	FSHDvar+	0.112782				SPA	svmLinearWeights2
detection_rate	FSHDvar+	0.0902256				SPA	svmLinearWeights2
detection_prevalence	FSHDvar+	0.225564				SPA	svmLinearWeights2
balanced_accuracy	FSHDvar+	0.823729				SPA	svmLinearWeights2
accuracy		0.796992	0.718552	0.86175	0.999175	SPA	nb
kappa		0.370331				SPA	nb
mcnemar					0.0001186	SPA	nb
sensitivity	FSHDvar+	0.8				SPA	nb
specificity	FSHDvar+	0.79661				SPA	nb
pos_pred_value	FSHDvar+	0.333333				SPA	nb
neg_pred_value	FSHDvar+	0.969072				SPA	nb
precision	FSHDvar+	0.333333				SPA	nb
recall	FSHDvar+	0.8				SPA	nb
f1	FSHDvar+	0.470588				SPA	nb
prevalence	FSHDvar+	0.112782				SPA	nb
detection_rate	FSHDvar+	0.0902256				SPA	nb
detection_prevalence	FSHDvar+	0.270677				SPA	nb
balanced_accuracy	FSHDvar+	0.798305				SPA	nb
accuracy		0.819549	0.743507	0.880826	0.992766	SPA	rf
kappa		0.384734				SPA	rf
mcnemar					0.00219965	SPA	rf
sensitivity	FSHDvar+	0.733333				SPA	rf
specificity	FSHDvar+	0.830508				SPA	rf
pos_pred_value	FSHDvar+	0.354839				SPA	rf
neg_pred_value	FSHDvar+	0.960784				SPA	rf
precision	FSHDvar+	0.354839				SPA	rf
recall	FSHDvar+	0.733333				SPA	rf
f1	FSHDvar+	0.478261				SPA	rf
prevalence	FSHDvar+	0.112782				SPA	rf
detection_rate	FSHDvar+	0.0827068				SPA	rf
detection_prevalence	FSHDvar+	0.233083				SPA	rf
balanced_accuracy	FSHDvar+	0.781921				SPA	rf
accuracy		0.87218	0.803252	0.923745	0.759349	SPA	ctree2
kappa		0.516157				SPA	ctree2
mcnemar					0.0152934	SPA	ctree2
sensitivity	FSHDvar+	0.8				SPA	ctree2
specificity	FSHDvar+	0.881356				SPA	ctree2
pos_pred_value	FSHDvar+	0.461538				SPA	ctree2
neg_pred_value	FSHDvar+	0.971963				SPA	ctree2
precision	FSHDvar+	0.461538				SPA	ctree2
recall	FSHDvar+	0.8				SPA	ctree2
f1	FSHDvar+	0.585366				SPA	ctree2
prevalence	FSHDvar+	0.112782				SPA	ctree2
detection_rate	FSHDvar+	0.0902256				SPA	ctree2
detection_prevalence	FSHDvar+	0.195489				SPA	ctree2
balanced_accuracy	FSHDvar+	0.840678				SPA	ctree2
accuracy		0.827068	0.751903	0.887103	0.986321	SPA	rpart
kappa		0.421848				SPA	rpart
mcnemar					0.000849227	SPA	rpart
sensitivity	FSHDvar+	0.8				SPA	rpart
specificity	FSHDvar+	0.830508				SPA	rpart
pos_pred_value	FSHDvar+	0.375				SPA	rpart
neg_pred_value	FSHDvar+	0.970297				SPA	rpart
precision	FSHDvar+	0.375				SPA	rpart
recall	FSHDvar+	0.8				SPA	rpart
f1	FSHDvar+	0.510638				SPA	rpart
prevalence	FSHDvar+	0.112782				SPA	rpart
detection_rate	FSHDvar+	0.0902256				SPA	rpart
detection_prevalence	FSHDvar+	0.240602				SPA	rpart
balanced_accuracy	FSHDvar+	0.815254				SPA	rpart
accuracy		0.887218	0.820812	0.935485	0.568212	SPA	C5.0
kappa		0.573079				SPA	C5.0
mcnemar					0.00982327	SPA	C5.0
sensitivity	FSHDvar+	0.866667				SPA	C5.0
specificity	FSHDvar+	0.889831				SPA	C5.0
pos_pred_value	FSHDvar+	0.5				SPA	C5.0
neg_pred_value	FSHDvar+	0.981308				SPA	C5.0
precision	FSHDvar+	0.5				SPA	C5.0
recall	FSHDvar+	0.866667				SPA	C5.0
f1	FSHDvar+	0.634146				SPA	C5.0
prevalence	FSHDvar+	0.112782				SPA	C5.0
detection_rate	FSHDvar+	0.0977444				SPA	C5.0
detection_prevalence	FSHDvar+	0.195489				SPA	C5.0
balanced_accuracy	FSHDvar+	0.878249				SPA	C5.0
accuracy		0.819549	0.743507	0.880826	0.992766	SPA	knn
kappa		0.408231				SPA	knn
mcnemar					0.000520244	SPA	knn
sensitivity	FSHDvar+	0.8				SPA	knn
specificity	FSHDvar+	0.822034				SPA	knn
pos_pred_value	FSHDvar+	0.363636				SPA	knn
neg_pred_value	FSHDvar+	0.97				SPA	knn
precision	FSHDvar+	0.363636				SPA	knn
recall	FSHDvar+	0.8				SPA	knn
f1	FSHDvar+	0.5				SPA	knn
prevalence	FSHDvar+	0.112782				SPA	knn
detection_rate	FSHDvar+	0.0902256				SPA	knn
detection_prevalence	FSHDvar+	0.24812				SPA	knn
balanced_accuracy	FSHDvar+	0.811017				SPA	knn
accuracy		0.766917	0.685767	0.835807	0.999974	SPA	earth
kappa		0.302251				SPA	earth
mcnemar					7.77224e-05	SPA	earth
sensitivity	FSHDvar+	0.733333				SPA	earth
specificity	FSHDvar+	0.771186				SPA	earth
pos_pred_value	FSHDvar+	0.289474				SPA	earth
neg_pred_value	FSHDvar+	0.957895				SPA	earth
precision	FSHDvar+	0.289474				SPA	earth
recall	FSHDvar+	0.733333				SPA	earth
f1	FSHDvar+	0.415094				SPA	earth
prevalence	FSHDvar+	0.112782				SPA	earth
detection_rate	FSHDvar+	0.0827068				SPA	earth
detection_prevalence	FSHDvar+	0.285714				SPA	earth
balanced_accuracy	FSHDvar+	0.75226				SPA	earth
